# Supplementary material
Source: MDPI journal article supplement (https://www.mdpi.com/2297-8739/9/12/447)
Supplement: s1 [file s1]

## Supplementary material

# Phytochemical, Antimicrobial, Antioxidant, and *In Vitro* Cytotoxicity Evaluation of *Echinops erinaceus* Kit Tan

Sherouk Hussein Sweilam<sup>1,2\*</sup>, Fatma M. Abdel Bar<sup>1,3</sup>, Ahmed I. Foudah<sup>1</sup>, Mohammed H. Alqarni<sup>1</sup>, Nouran A. Elattal<sup>4</sup>, Omayma D. El-Gindi<sup>2</sup>, Moshera M. El- Sherei<sup>5</sup>, and Essam Abdel-Sattar<sup>5\*</sup>

<sup>1</sup> Department of Pharmacognosy, College of Pharmacy, Prince Sattam Bin Abdulaziz University, Al-Kharj 11942, Saudi Arabia.

<sup>2</sup> Department of Pharmacognosy, Faculty of Pharmacy, Egyptian Russian University, Badr City, Cairo-Suez Road, 11829 Cairo, Egypt.

<sup>3</sup> Department of Pharmacognosy, Faculty of Pharmacy, Mansoura University, Mansoura 35516, Egypt.

<sup>4</sup> Department of Chemistry of Natural and Microbial Products, National Research Center, Dokki, Giza 12622, Egypt

<sup>5</sup> Department of Pharmacognosy, Faculty of Pharmacy, Faculty of Pharmacy, Cairo University, Kasr El-Aini Street, 11562 Cairo, Egypt.

## Corresponding author:

[essam.abdelsattar@pharma.cu.edu.eg](mailto:essam.abdelsattar@pharma.cu.edu.eg) (Essam A. Abdel-Sattar)

---

## \*Corresponding author

Essam Abdel-Sattar

[essam.abdelsattar@pharma.cu.edu.eg](mailto:essam.abdelsattar@pharma.cu.edu.eg) (Essam Abdel-Sattar),

ORCID: <https://orcid.org/0000-0002-0617-1420>

## Table of Contents

|                      |                                                                                                                                                                                                                 |
|----------------------|-----------------------------------------------------------------------------------------------------------------------------------------------------------------------------------------------------------------|
| <b>Table S1.</b>     | NMR spectral data for the compounds <b>C1*</b> and <b>C2**</b> in CDCl <sub>3</sub> .                                                                                                                           |
| <b>Table S2.</b>     | NMR spectral data for the compound <b>C4</b> in CDCl <sub>3</sub> .                                                                                                                                             |
| <b>Table S3.</b>     | NMR spectral data for the compound <b>C6</b> in CD <sub>3</sub> OD.                                                                                                                                             |
| <b>Table S4.</b>     | NMR spectral data for the compound <b>C7</b> in CD <sub>3</sub> OD.                                                                                                                                             |
| <b>Table S5.</b>     | <i>In silico</i> physicochemical and pharmacokinetics of compounds <b>C1-C7</b> .                                                                                                                               |
| <b>Table S6.</b>     | Docking results of isolated compounds against PDB ID:1KZN, 3GNS, 7AFW, 4M6J, and 6C0V enzymes (binding energies, interaction type derived from the best conformations of each compound into the macromolecule). |
| <b>Flowchart S1.</b> | Fractionation and purification of the CHCl <sub>3</sub> extract of <i>E. erinaceus</i> .                                                                                                                        |
| <b>Fig. S1.</b>      | <sup>1</sup> H-NMR spectrum of mixture of <b>C1*</b> and <b>C2**</b> in CDCl <sub>3</sub> .                                                                                                                     |
| <b>Fig. S2.</b>      | APT spectrum of mixture of <b>C1*</b> and <b>C2**</b> in CDCl <sub>3</sub> .                                                                                                                                    |
| <b>Fig. S3.</b>      | HSQC spectrum (expansion; 0.5-5.5 ppm) of mixture of <b>C1*</b> and <b>C2**</b> in CDCl <sub>3</sub> .                                                                                                          |
| <b>Fig. S4.</b>      | COSY spectrum (expansion; 0.6-5.6 ppm) of mixture of <b>C1*</b> and <b>C2**</b> in CDCl <sub>3</sub> .                                                                                                          |
| <b>Fig. S5.</b>      | HMBC spectrum (expansion; 0-6.0 and 1.3-4.4 ppm) of mixture of <b>C1*</b> and <b>C2**</b> in CDCl <sub>3</sub> .                                                                                                |
| <b>Fig. S6.</b>      | <sup>1</sup> H-NMR spectrum (expansion; 0.5-8.5, 0.9-2.6, 3.5-7.5 ppm) of <b>C3</b> in CD <sub>3</sub> OD.                                                                                                      |
| <b>Fig. S7.</b>      | <sup>13</sup> C-NMR spectrum of <b>C3</b> in CD <sub>3</sub> OD.                                                                                                                                                |
| <b>Fig. S8.</b>      | APT spectrum of <b>C3</b> in CD <sub>3</sub> OD.                                                                                                                                                                |
| <b>Fig. S9.</b>      | DEPT spectrum (expansion; 14-48 and 115-160 ppm) of <b>C3</b> in CD <sub>3</sub> OD.                                                                                                                            |
| <b>Fig. S10.</b>     | HSQC-NMR spectrum (expansion; 0.8-2.8 and 5.35-6.0 ppm) of <b>C3</b> in CD <sub>3</sub> OD.                                                                                                                     |
| <b>Fig. S11.</b>     | COSY spectrum (expansion; 0.9-2.8 ppm) of <b>C3</b> in CD <sub>3</sub> OD.                                                                                                                                      |
| <b>Fig. S12.</b>     | HMBC spectrum (expansion; -1.5 – 6.5 ppm) of <b>C3</b> in CD <sub>3</sub> OD.                                                                                                                                   |
| <b>Fig. S13.</b>     | HR-ESI-MS spectrum (positive mode) of <b>C3</b> .                                                                                                                                                               |
| <b>Fig. S14.</b>     | <sup>1</sup> H-NMR spectrum of <b>C4</b> in CDCl <sub>3</sub> .                                                                                                                                                 |
| <b>Fig. S15.</b>     | <sup>13</sup> C-NMR spectrum of <b>C4</b> in CDCl <sub>3</sub> .                                                                                                                                                |
| <b>Fig. S16.</b>     | DEPT spectrum of <b>C4</b> in CDCl <sub>3</sub> .                                                                                                                                                               |
| <b>Fig. S17.</b>     | HSQC spectrum (expansion; 1.1-2.4 ppm and 4.1-5.7 ppm) of <b>C4</b> in CDCl <sub>3</sub> .                                                                                                                      |
| <b>Fig. S18.</b>     | COSY spectrum (expansion; 0.5-6.5 ppm) of <b>C4</b> in CDCl <sub>3</sub> .                                                                                                                                      |
| <b>Fig. S19.</b>     | HMBC spectrum (expansion; A. 1.0-2.7, B. 1.0-5.8, and C. 3.9-5.9 ppm) of <b>C4</b> in CDCl <sub>3</sub> .                                                                                                       |
| <b>Fig. S20.</b>     | NOESY spectrum (expansion; 0.5-6.5 ppm) of <b>C4</b> in CDCl <sub>3</sub> .                                                                                                                                     |
| <b>Fig. S21.</b>     | HR-ESI-MS (+ mode) spectrum (expansion; 170-420 <i>m/z</i> ) of <b>C4</b> in CDCl <sub>3</sub> .                                                                                                                |
| <b>Fig. S22.</b>     | <sup>1</sup> H-NMR spectrum of <b>C5</b> in CD <sub>3</sub> OD.                                                                                                                                                 |
| <b>Fig. S23.</b>     | APT spectrum (expansion; 18-66 and 80-205 ppm) of <b>C5</b> in CD <sub>3</sub> OD.                                                                                                                              |
| <b>Fig. S24.</b>     | DEPT spectrum (expansion; 12-70 and 111-141 ppm) of <b>C5</b> in CD <sub>3</sub> OD.                                                                                                                            |
| <b>Fig. S25.</b>     | HSQC spectrum (expansion; 0.9-4.0 and 5.7-7.9 ppm) of <b>C5</b> in CD <sub>3</sub> OD.                                                                                                                          |
| <b>Fig. S26.</b>     | COSY spectrum of <b>C5</b> in CD <sub>3</sub> OD.                                                                                                                                                               |
| <b>Fig. S27.</b>     | HMBC spectrum of <b>C5</b> in CD <sub>3</sub> OD.                                                                                                                                                               |
| <b>Fig. S28.</b>     | HR-ESI-MS (- mode) spectrum (expansion; 200-800 <i>m/z</i> ) of <b>C5</b> in CD <sub>3</sub> OD.                                                                                                                |
| <b>Fig. S29.</b>     | HR-ESI-MS (+ mode) spectrum (expansion; 200-800 <i>m/z</i> ) of <b>C5</b> in CD <sub>3</sub> OD.                                                                                                                |
| <b>Fig. S30.</b>     | <sup>1</sup> H-NMR spectrum (expansion; 6.0-8.0 ppm) of <b>C6</b> in CD <sub>3</sub> OD.                                                                                                                        |

- Fig. S31.** APT spectrum (expansion; 95-200 ppm) of **C6** in CD<sub>3</sub>OD.
- Fig. S32.** <sup>1</sup>H-NMR spectrum of **C7** in CD<sub>3</sub>OD.
- Fig. S33.** APT spectrum (expansion; 30-210 ppm) of **C7** in CD<sub>3</sub>OD.
- Fig. S34.** DEPT spectrum (expansion; 30-145 ppm) of **C7** in CD<sub>3</sub>OD.
- Fig. S35.** HSQC spectrum (expansion; 5.1-7.2 ppm) of **C7** in CD<sub>3</sub>OD.
- Fig. S36.** COSY spectrum (expansion; 2.6-7.2 ppm) of **C7** in CD<sub>3</sub>OD.
- Fig. S37.** HMBC spectrum (expansion; 2.4-7.2 ppm) of **C7** in CD<sub>3</sub>OD.
- Fig. S38.** Two-dimensional (2D) molecular interactions of isolated compounds **(a)** Clorobiocin (CBN), reference inhibitor, **(b-h)** Compounds **C1-C7** with DNA Gyrase Topoisomerase II (*E. coli*) enzyme (PDB ID:1KZN), (dimensions X:21.0176, Y: 30.3575, Z:27.6357).
- Fig. S39.** Two-dimensional (2D) molecular interactions of **(a)** Triclosan, TRI, Reference Ligand, and **(b-h)** compounds **C1-C7** with Enoyl-Acyl Carrier Protein Reductase (*S. aureus*), (FabI) (PDB ID:3GNS), (dimensions (Å) X:43.7680, Y: 51.7046, Z:49.0095).
- Fig. S40.** Two-dimensional (2D) molecular interactions of **(a)** Reference Ligand, R9Q, and **(b-h)** isolated compounds **C1-C-7** with  $\beta$ -Catenin (PDB ID:7AFW), (dimensions (Å) X:20.4162, Y: 21.1198, Z:25.0).
- Fig. S41.** Two-dimensional (2D) molecular interactions of **(a)** NDP, Reference Ligand, **(b-h)** isolated compounds **C1-C7**, and **(i)** Methotrexate, and **(j)** Ciprofloxacin with Crystal structure of human dihydrofolate reductase (DHFR) bound to NADPH (PDB ID:4M6J), Ciprofloxacin (PubChem ID: 2764), Methotrexate (PubChem ID: 12694), (dimensions (Å) X:20.8191, Y:24.1576, Z:27.1117), (root mean square deviation) RMSD < 2.
- Fig. S42.** Two-dimensional (2D) molecular interactions of **(a)** Doxorubicin (PubChem ID: 31703), and isolated compounds; **(b-h)** Compound **C1-C7** with Crystal structure of human P-gp (PDB ID: 6C0V), (dimensions (Å) X:20.8191, Y:24.1576, Z:27.1117), (root mean square deviation) RMSD < 2. Width 995.
- Fig. S43.** Bioavailability radar representation of compounds **C1-C7** (compounds **1-7**).
- Fig. S44.** Predicted BOILED-Egg diagram of compounds **C1-C7** (compounds **1-7**, respectively).

**Table S1. NMR spectral data for the mixture of C1\* and C2\*\* in CDCl<sub>3</sub>.**

| P.    | Type              |                   | Compounds C1* and C2**             |                                           |              |               |                     |              | Reported *** |             |
|-------|-------------------|-------------------|------------------------------------|-------------------------------------------|--------------|---------------|---------------------|--------------|--------------|-------------|
|       |                   |                   | HSQC $\delta_H$ (J in Hz) */**     |                                           | $\delta_C$ * | $\delta_C$ ** | HMBC (H→C) *        | COSY *       | $\delta_H$   | $\delta_C$  |
|       | C-1*              | C-2**             | C-1*                               | C-2**                                     | C-1*         | C-2**         | C-1* / C-2**        | C-1* / C-2** | C-1* / C-2** |             |
| 1     | CO                | CO                |                                    |                                           | 174.3        | 174.7         |                     |              |              | 180.5       |
| 2     | CH <sub>2</sub>   | CH <sub>2</sub>   | 2.22, <i>q</i> , (8.0, 15.8)       |                                           | 34.4         | 34.7          | C-1                 | C-3          | 2.36         | 34.0        |
| 3     | CH <sub>2</sub>   | CH <sub>2</sub>   | 1.54, <i>br.s</i>                  |                                           | 25.3         | 25.3          | C-1, C-2, C-4       | C-2, C-4     | 1.64         | 24.6        |
| 4-7   | CH <sub>2</sub>   | CH <sub>2</sub>   | 1.17, 1.22, <i>m</i>               |                                           | 29.7- 30.1   | 29.8-30.1     | C-3                 | C-8          | 1.30         | 29-3        |
| 8     | CH <sub>2</sub>   | CH <sub>2</sub>   | 1.96, <i>m</i> *, 1.54, <i>m</i> * | 2.70, <i>m</i> **                         | 25.9         | 26.0          | C-12, C-7           | C-7, C-9     | 2.03         | 27.1        |
| 9     | CH                | CH                | 5.30, <i>m</i>                     |                                           | 128.3        | 128.4         | C-8, C-11           | C-8          | 5.36         | 130.0       |
| 10    | CH                | CH                | 5.30, <i>m</i>                     |                                           | 130.4        | 130.6         | C-8, C-11           | C-11         | 5.36         | 130.0       |
| 11    | CH <sub>2</sub>   | CH <sub>2</sub>   | 1.96, <i>m</i>                     |                                           | 27.6         | 27.6          | C-9, C-10, C-12     | C-10, C-12   | 2.03         | 27.1        |
| 12-15 | CH <sub>2</sub>   | CH <sub>2</sub>   | 1.17, 1.22, <i>m</i>               |                                           | 29.7-30.1    | 29.8-31.0     |                     |              | 1.30         | 29.0 - 31.0 |
| 16    | CH <sub>2</sub>   | CH <sub>2</sub>   |                                    |                                           | 31.9         | 32.3          |                     |              |              |             |
| 17    | CH <sub>2</sub>   | CH <sub>2</sub>   |                                    |                                           | 23.0         | 23.1          |                     | C-18         |              | 22.5        |
| 18    | CH <sub>3</sub>   | CH <sub>3</sub>   | 0.80, <i>s</i> *                   | 0.81, <i>s</i> **                         | 14.5         | 14.5          | C-17                | C-17         | 0.89         | 14.1        |
| 1'    | O-CH <sub>3</sub> | O-CH <sub>2</sub> | 3.59, <i>s</i> *                   | 4.04, <i>q</i> , <i>J</i> = (7.0, 14.0)** | 51.8         | 60.5          | C-1* C-1**, C-2'*** | C-2'         |              | 51.9 60.4   |
| 2'    |                   | CH <sub>3</sub>   | 1.17, overlapped                   |                                           |              | 14.6          | C-1'***             | C-1'         |              |             |

\* Signals are related to compound **C1**.

\*\* Signals are related to compound **C2**.

\*\*\* published data for methyl oleate and ethyl oleate [35,36].



**Table S2. NMR spectral data for the compound C4 in CDCl<sub>3</sub>.**

| P.        | Compound C4     |                                                      |                  |                                     |                                     |                                     |                                | Reported *<br>(600 MHz, acetone- <i>d</i> <sub>6</sub> ) |                                                          |                  |
|-----------|-----------------|------------------------------------------------------|------------------|-------------------------------------|-------------------------------------|-------------------------------------|--------------------------------|----------------------------------------------------------|----------------------------------------------------------|------------------|
|           | HSQC            |                                                      | HMBC (H→C)       |                                     |                                     | COSY                                | NOESY                          | HSQC                                                     |                                                          |                  |
|           | Type            | δ <sub>H</sub> ( <i>J</i> in Hz) *                   | δ <sub>C</sub> * | <sup>2</sup> <i>J</i> <sub>CH</sub> | <sup>3</sup> <i>J</i> <sub>CH</sub> | <sup>4</sup> <i>J</i> <sub>CH</sub> | <sup>1</sup> H- <sup>1</sup> H | <sup>1</sup> H- <sup>1</sup> H                           | δ <sub>H</sub> ( <i>J</i> in Hz) *                       | δ <sub>C</sub> * |
| <b>1</b>  | C               |                                                      | 36.1             |                                     |                                     |                                     |                                |                                                          |                                                          | 36.5             |
| <b>2</b>  | CH <sub>2</sub> | 1.41, <i>dd</i> (14.5, 3.3); 1.90, <i>d</i> , (14.5) | 47.2             | C-1                                 | C-4, C-6, C-10                      |                                     | H-3                            | H-12, H-10                                               | 1.99, <i>dd</i> (14.2, 3.7); 1.54, <i>dd</i> (14.3, 3.5) | 48.0             |
| <b>3</b>  | CH              | 4.24, <i>br.s</i>                                    | 66.5             | C-4                                 | C-1, C-5                            |                                     | H-2, H-4                       | H-11                                                     | 4.29, <i>m</i>                                           | 66.9             |
| <b>4</b>  | CH <sub>2</sub> | 2.4, <i>d</i> (13.8); 1.63, <i>dd</i> (3.6, 14.0)    | 45.5             |                                     | C-2, C-6                            |                                     | H-3                            | H-12                                                     | 2.39, <i>dd</i> (13.4, 3.7); 1.71, <i>dd</i> (13.6, 3.7) | 46.5             |
| <b>5</b>  | C               |                                                      | 87.4             |                                     |                                     |                                     |                                |                                                          |                                                          | 87.1             |
| <b>6</b>  | C               |                                                      | 183.5            |                                     |                                     |                                     |                                |                                                          |                                                          | 183.5            |
| <b>7</b>  | CH              | 5.60, <i>s</i>                                       | 112.6            | C-8, C-6                            | C-1, C-5                            |                                     |                                | H-13                                                     | 5.68, <i>s</i>                                           | 113.4            |
| <b>8</b>  | C               |                                                      | 172.6            |                                     |                                     |                                     |                                |                                                          |                                                          | 171.7            |
| <b>9</b>  | CH <sub>3</sub> | 1.18, <i>s</i>                                       | 30.7             |                                     | C-6                                 | C-1                                 |                                | H-9                                                      | 1.26, <i>s</i>                                           | 30.4             |
| <b>10</b> | CH <sub>3</sub> | 1.39, <i>s</i>                                       | 26.4             |                                     | C-6                                 |                                     |                                | H-12                                                     | 1.47, <i>s</i>                                           | 27.6             |
| <b>11</b> | CH <sub>3</sub> | 1.70, <i>s</i>                                       | 26.9             | C-1                                 | C-2, C-6                            |                                     |                                | H-10                                                     | 1.74, <i>s</i>                                           | 27.0             |

\* published data [40].

**Table S3. NMR spectral data for the Compound C6 in CD<sub>3</sub>OD.**

| P. | Compound C6                           |                     |                                         |                       |
|----|---------------------------------------|---------------------|-----------------------------------------|-----------------------|
|    | C6                                    |                     | Reported *                              |                       |
|    | $\delta_{\text{H}}$ ( <i>J</i> in Hz) | $\delta_{\text{C}}$ | $\delta_{\text{H}}$ ( <i>J</i> in Hz) * | $\delta_{\text{C}}$ * |
| 1  |                                       | 127.1               |                                         | 127.6                 |
| 2  | 7.41, <i>d</i> (8.5)                  | 130.9               | 7.41, <i>d</i> (8.5)                    | 130.8                 |
| 3  | 6.78, <i>d</i> (8.5)                  | 116.6               | 6.78, <i>d</i> (8.5)                    | 116.7                 |
| 4  |                                       | 160.9               |                                         | 160.8                 |
| 5  | 6.78, <i>d</i> (8.5)                  | 116.6               | 6.78, <i>d</i> (8.5)                    | 116.7                 |
| 6  | 7.41, <i>d</i> (8.5)                  | 130.9               | 7.41, <i>d</i> (8.5)                    | 130.8                 |
| 7  | 7.56, <i>d</i> (15.9)                 | 146.3               | 7.51, <i>d</i> (15.9)                   | 145.2                 |
| 8  | 6.26, <i>d</i> (15.9)                 | 115.8               | 6.27, <i>d</i> (15.9)                   | 116.0                 |
| 9  |                                       | 177.8               |                                         | 178.0                 |

\* published data [56].

**Table S4. NMR spectral data for the compound C7 in CD<sub>3</sub>OD.**

| P. | Compound C7                           |                     |                   |                   |                   |                                 | Reported *                              |                       |
|----|---------------------------------------|---------------------|-------------------|-------------------|-------------------|---------------------------------|-----------------------------------------|-----------------------|
|    | HSQC                                  |                     | HMBC (H→C)        |                   | COSY              | (400/100 MHz, DMSO- <i>d</i> 6) | $\delta_{\text{H}}$ ( <i>J</i> in Hz) * | $\delta_{\text{C}}$ * |
|    | $\delta_{\text{H}}$ ( <i>J</i> in Hz) | $\delta_{\text{C}}$ | $^2J_{\text{CH}}$ | $^3J_{\text{CH}}$ | $^4J_{\text{CH}}$ | $^1\text{H}-^1\text{H}$         |                                         |                       |
| 2  | 5.25, <i>dd</i> (12.8, 2.8)           | 81.0                |                   |                   |                   | H-3                             | 5.37, <i>dd</i> (12.5, 3.0)             | 78.5                  |
| 3  | 3.05, <i>d</i> (17.2, 12.8)           | 44.6                | C-4               | C-10              |                   | H-2                             | 3.19, <i>dd</i> (17.1, 12.5)            | 42.1                  |
|    | 2.67, <i>dd</i> (17.2, 2.9)           |                     | C-2, C-4          | C-1'              |                   | H-2                             | 2.67, <i>dd</i> (17.1, 3.0)             |                       |
| 4  |                                       | 196.5               |                   |                   |                   |                                 |                                         | 196.5                 |
| 5  | 12.08, <i>s</i>                       | 160.9               |                   |                   |                   |                                 | 12.97, <i>s</i>                         | 163.0                 |
| 6  | 5.87, <i>d</i> , <i>J</i> =7.5 Hz     | 97.6                |                   |                   |                   |                                 | 5.88, <i>s</i>                          | 95.9                  |
| 7  |                                       | 167.0               |                   |                   |                   |                                 | 10.81, <i>s</i>                         | 166.7                 |
| 8  | 5.87, <i>d</i> , <i>J</i> =7.5 Hz     | 96.7                |                   |                   |                   |                                 | 5.88, <i>s</i>                          | 95.1                  |
| 9  |                                       | 161.8               |                   |                   |                   |                                 |                                         | 163.6                 |
| 10 |                                       | 101.9               |                   |                   |                   |                                 |                                         | 101.9                 |
| 1' |                                       | 132.3               |                   |                   |                   |                                 |                                         | 129.6                 |
| 2' | 6.76, <i>s</i>                        | 116.7               | C-1', C-3'        | C-2, C-4'         |                   |                                 | 6.75, <i>s</i>                          | 114.5                 |
| 3' |                                       | 147.4               |                   |                   |                   |                                 | 9.09, <i>s</i>                          | 145.8 <sup>a</sup>    |
| 4' | 6.89, <i>s</i>                        | 115.2               | C-3'/C-5'         | C-6'              | C-2               |                                 | 6.88, <i>s</i>                          | 118.1                 |
| 5' |                                       | 147.4               |                   |                   |                   |                                 | 9.04, <i>s</i>                          | 145.3 <sup>a</sup>    |
| 6' | 6.76, <i>s</i>                        | 119.7               | C-1', C-3'        | C-2, C-4'         |                   |                                 | 6.75, <i>s</i>                          | 115.5                 |

\* Published data [48,55]. <sup>a</sup>: interchangeable values.

**Table S5. *In silico* Physicochemical and pharmacokinetics of compounds C1-C7.**

| Predictive parameters                                 | C1                           | C2                   | C3                           | C4                                                                                  | C5                           | C6                           | C7                              |
|-------------------------------------------------------|------------------------------|----------------------|------------------------------|-------------------------------------------------------------------------------------|------------------------------|------------------------------|---------------------------------|
| <b>Pass prediction (Pa/Pi) <sup>a</sup></b>           |                              |                      |                              |                                                                                     |                              |                              |                                 |
| <b>Anti-inflammatory/<br/>Intestinal <sup>a</sup></b> | 0.717/ 0.002 <sup>a</sup>    | 0.672/<br>0.019      | 0.415/<br>0.008              | 0.515/ 0.053                                                                        | 0.325/<br>0.139              | 0.641/<br>0.024              | 0.697/ 0.016                    |
| <b>Antimycobacterial/ antibacterial <sup>b</sup></b>  | 0.367/ 0.049                 | 0.427/<br>0.033      | 0.312/<br>0.056 <sup>b</sup> | 0.455/ 0.021<br><sub>b</sub>                                                        | 0.176/<br>0.140 <sup>b</sup> | 0.457/<br>0.026              | 0.403/ 0.029 <sup>b</sup>       |
| <b>Anti-ulcerative</b>                                | 0.662/ 0.007                 | 0.688/<br>0.005      |                              |                                                                                     |                              | 0.581/<br>0.013              | 0.604/ 0.011                    |
| <b>Antineoplastic/ Anticarcinogenic <sup>c</sup></b>  | 0.343/ 0.044<br><sub>c</sub> | 0.546/<br>0.017      | 0.366/<br>0.118              | 0.746/ 0.019;<br>0.305/ 0.032<br>(Colon<br>cancer);<br>0.437/ 0.026<br><sub>c</sub> | 0.591/<br>0.047              | 0.559/<br>0.015 <sup>c</sup> | 0.662/ 0.007<br>(Breast cancer) |
| <b>Antifungal</b>                                     | 0.505/ 0.030                 | 0.487/<br>0.033      | 0.380/<br>0.054              | 0.393/ 0.051                                                                        | 0.364/<br>0.059              | 0.451/<br>0.039              | 0.593/ 0.019                    |
| <b>TNF expression inhibitor</b>                       | 0.672/ 0.008                 | 0.609/<br>0.012      | 0.323/<br>0.089              | 0.309/ 0.097                                                                        | 0.680/<br>0.007              | 0.737/<br>0.005              | 0.496/ 0.030                    |
| <b>CYP2J2 substrate</b>                               |                              |                      |                              |                                                                                     |                              | 0.836/<br>0.008              | 0.659/ 0.044                    |
| <b>CYP2C12 substrate</b>                              | 0.752/ 0.047                 | 0.812/<br>0.033      | 0.726/<br>0.052              | 0.871/ 0.019                                                                        |                              |                              | 0.898/ 0.012                    |
| <b>CYP3A1 substrate</b>                               | 0.700/0.009                  | 0.680/<br>0.010      | 0.535/<br>0.036              |                                                                                     | 0.254/<br>0.138              | 0.540/<br>0.034              | 0.580/ 0.024                    |
| <b>CYP4A2 substrate</b>                               | 0.696/ 0.002                 | 0.671/<br>0.002      |                              | 0.363/ 0.044                                                                        |                              |                              |                                 |
| <b>Oxygen/ free radical scavenger/antioxidant</b>     | 0.628/ 0.017                 | 0.600/<br>0,023      |                              | 0,297/ 0,023                                                                        | 0,350/<br>0,017              | 0,627/<br>0,005              | 0,828/ 0,003                    |
| <b>ADME Prediction <sup>b</sup></b>                   |                              |                      |                              |                                                                                     |                              |                              |                                 |
| <b>Physicochemical parameters</b>                     |                              |                      |                              |                                                                                     |                              |                              |                                 |
| <b>TPSA (<sup>0</sup>A):</b>                          | 26.30 Å <sup>2</sup>         | 26.30 Å <sup>2</sup> | 37.30 Å <sup>2</sup>         | 46.53 Å <sup>2</sup>                                                                | 113.29 Å <sup>2</sup>        | 57.53 Å <sup>2</sup>         | 107.22 Å <sup>2</sup>           |
| <b>Molar Refractivity</b>                             | 94.26                        | 99.06                | 70.66                        | 52.51                                                                               | 126.50                       | 45.13                        | 73.59                           |
| <b>Drug likeness Prediction</b>                       |                              |                      |                              |                                                                                     |                              |                              |                                 |
| <b>Bioavailability Score</b>                          | 0.55                         | 0.55                 | 0.55                         | 0.55                                                                                | 0.55                         | 0.85                         | 0.55                            |
| <b>Synthetic accessibility</b>                        | 3.16                         | 3.34                 | 4.14                         | 3.63                                                                                | 3.63                         | 1.61                         | 3.09                            |

| Absorption Prediction                                  |                             |       |         |              |              |         |                             |
|--------------------------------------------------------|-----------------------------|-------|---------|--------------|--------------|---------|-----------------------------|
| Log <i>S</i> (ESOL)                                    | -5.32                       | -5.70 | -2.65   | -1.69        | -1.69        | -2.02   | -3.40                       |
| Consensus Log <i>P</i> <sub><i>o/w</i></sub>           | 5.95                        | 6.33  | 2.72    | 1.53         | 1.53         | 1.26    | 1.48                        |
| Solubility class                                       | Moderately soluble          |       | Soluble | Very soluble | Very soluble | Soluble | Soluble                     |
| Distribution Prediction/Pharmacokinetics               |                             |       |         |              |              |         |                             |
| Log <i>K</i> <sub>p</sub> (skin permeation, cm/s)      | -2.82                       | -2.49 | -6.15   | -6.79        | -6.79        | -6.26   | -6.46                       |
| GI absorption                                          | High                        | Low   | High    | High         | High         | High    | High                        |
| BBB permeant                                           | No                          | No    | Yes     | Yes          | Yes          | Yes     | No                          |
| Metabolism Prediction                                  |                             |       |         |              |              |         |                             |
| P-gp substrate                                         | No                          | No    | No      | No           | No           | No      | Yes                         |
| CYP1A2, CYP2C19, CYP2C9, CYP2D6, and CYP3A4 inhibitors | All No, except Yes (CYP1A2) |       | No      | No           | No           | No      | All No, except Yes (CYP3A4) |

Where “Pa” is probable activity, “Pi” is probable inactivity, “Å<sup>2</sup>” polar surface area, “TPSA” Topological polar surface area, and Methyl oleate (**C1**), Ethyl oleate (**C2**), erinaceosin (**C3**), loliolide (**C4**), erinaceol (**C5**), (*E*)-*p*-coumaric acid (**C6**), and 5,7,3',5'-tetrahydroxy flavanone (**C7**). <sup>a</sup> PASS prediction web tool [29], <sup>b</sup> SwissADME web tool [30].

**Table S6.** Docking results of isolated compounds against PDB ID:1KZN, 3GNS, 7AFW, 4M6J, and 6C0V enzymes (binding free energies, interaction type derived from the best conformations of each compound into the macromolecule).

| Score/ Interactions                                                              | Isolated Compounds                                        |                                            |                                                                                                                       |                                                                                                                |                                                                                                                                |                                                                                     |                                                                                                 | Co-Crystallized Ligand(s)                                                                |               |  |
|----------------------------------------------------------------------------------|-----------------------------------------------------------|--------------------------------------------|-----------------------------------------------------------------------------------------------------------------------|----------------------------------------------------------------------------------------------------------------|--------------------------------------------------------------------------------------------------------------------------------|-------------------------------------------------------------------------------------|-------------------------------------------------------------------------------------------------|------------------------------------------------------------------------------------------|---------------|--|
|                                                                                  | C1                                                        | C2                                         | C3                                                                                                                    | C4                                                                                                             | C5                                                                                                                             | C6                                                                                  | C7                                                                                              | CBN                                                                                      | TRI           |  |
| <b>Antimicrobial Molecular Docking</b>                                           |                                                           |                                            |                                                                                                                       |                                                                                                                |                                                                                                                                |                                                                                     |                                                                                                 |                                                                                          |               |  |
| <b>1. DNA Gyrase Topoisomerase II (<i>E. coli</i>), (PDB ID:1KZN)</b>            |                                                           |                                            |                                                                                                                       |                                                                                                                |                                                                                                                                |                                                                                     |                                                                                                 |                                                                                          |               |  |
| <b>BFE<sup>a</sup> (kcal/mol)</b>                                                | -4.5                                                      | -4.1                                       | -5.7                                                                                                                  | -4.9                                                                                                           | -5.7                                                                                                                           | -5.5                                                                                | -7.7                                                                                            | -7.4                                                                                     |               |  |
| <b>Amide- <math>\pi</math>-stucked</b>                                           |                                                           |                                            |                                                                                                                       |                                                                                                                |                                                                                                                                |                                                                                     |                                                                                                 | <b>Asn46*</b>                                                                            |               |  |
| <b>HB</b>                                                                        | <b>Asn46*</b><br><b>Gly119*</b><br><b>Val120*</b>         |                                            | <b>Ala96</b><br><b>Gly117*</b>                                                                                        | <b>Ala96</b><br><b>Asn46*</b>                                                                                  | <b>Ala96</b><br><b>Gly117*,</b><br><b>119*</b><br>Ser121                                                                       | <b>Ala96</b><br><b>Asn46*</b>                                                       | <b>Glu42</b><br><b>Val120*</b><br>Ser121                                                        | <b>Arg136</b><br><b>Asn46*</b><br><b>Asp73*</b>                                          |               |  |
| <b>Ha.B</b>                                                                      |                                                           |                                            |                                                                                                                       |                                                                                                                |                                                                                                                                |                                                                                     |                                                                                                 | <b>Gly77</b>                                                                             |               |  |
| <b><math>\pi</math>-alkyl/alkyl</b>                                              | <b>Ala86, 96</b><br>Val89                                 | <b>Ala86, 96</b><br><b>Ile90*</b><br>Val89 |                                                                                                                       |                                                                                                                |                                                                                                                                | <b>Ala96</b><br><b>Ile90*</b>                                                       | <b>Ile90*</b>                                                                                   | <b>Ala47</b><br><b>Ile90*</b><br>Pro79<br><b>Val71*</b>                                  |               |  |
| <b><math>\pi</math>-<math>\sigma</math></b>                                      |                                                           |                                            |                                                                                                                       |                                                                                                                |                                                                                                                                |                                                                                     |                                                                                                 | <b>Thr165</b>                                                                            |               |  |
| <b><math>\pi</math>-Cation/ <math>\pi</math>-Anion</b>                           |                                                           |                                            |                                                                                                                       |                                                                                                                |                                                                                                                                |                                                                                     |                                                                                                 | <b>Arg76</b><br><b>Glu50*</b>                                                            |               |  |
| <b>VDW</b>                                                                       | <b>Asp49*</b><br><b>His95*</b><br><b>Ile90*</b><br>Ser121 | Ser85<br>Val84                             | <b>Asp45</b><br><b>Asn46*</b><br>Glu42<br><b>Gly119*</b><br><b>His95*</b><br><b>Ile90*</b><br>Ser121<br>Val93,<br>118 | <b>Gly117,</b><br><b>119*</b><br><b>His95*</b><br><b>Ile90*</b><br>Ser121<br><b>Val93, 118,</b><br><b>120*</b> | <b>Asn46*</b><br><b>Asp45, 49*</b><br>Glu42<br><b>His95*, 116</b><br><b>Ile90*</b><br>Leu94<br>Val93, 118,<br><b>120*, 122</b> | <b>Asp49*</b><br><b>His95*</b><br><b>Leu94*</b><br><b>Gly119*</b><br><b>Val120*</b> | <b>Asn46*</b><br><b>Asp45, 49*</b><br><b>His95*</b><br><b>Leu94*</b><br><b>Gly119*</b><br>Val93 | <b>Ala86</b><br><b>Asp49*</b><br>Ile78<br>Met91, 166<br>Val43,<br><b>Val120*,</b><br>167 |               |  |
| <b>C:H bond</b>                                                                  |                                                           |                                            |                                                                                                                       |                                                                                                                |                                                                                                                                |                                                                                     | <b>Gly117</b>                                                                                   |                                                                                          |               |  |
| <b>2. Enoyl-Acyl Carrier Protein Reductase (<i>S. aureus</i>) (PDB ID: 3GNS)</b> |                                                           |                                            |                                                                                                                       |                                                                                                                |                                                                                                                                |                                                                                     |                                                                                                 |                                                                                          |               |  |
| <b>BFE<sup>a</sup> (kcal/mol)</b>                                                | -4.5                                                      | -5.1                                       | -6.3                                                                                                                  | -5.9                                                                                                           | -6.0                                                                                                                           | -5.8                                                                                | -6.9                                                                                            |                                                                                          | -5.8          |  |
| <b>Amide- <math>\pi</math>-stucked</b>                                           |                                                           |                                            |                                                                                                                       |                                                                                                                |                                                                                                                                | <b>Phe77</b>                                                                        |                                                                                                 |                                                                                          |               |  |
| <b>HB</b>                                                                        | <b>Asn205</b><br><b>Leu196*</b>                           | <b>Ala21</b><br>Ile20                      | <b>Arg45</b><br>Gln64                                                                                                 | <b>Ser19'</b><br>Thr146'                                                                                       | <b>Ala21'</b><br>Gly13'                                                                                                        | <b>Asn86</b><br>Lys134                                                              | <b>Gly13'</b><br>Ser93'                                                                         |                                                                                          | <b>Ser19'</b> |  |

|                                                                                                  |                                                                |                                                                                 |                                                                      |                                                                                             |                                                                              |                                                                         |                                                                                           |                                                                                           |                                                                         |  |
|--------------------------------------------------------------------------------------------------|----------------------------------------------------------------|---------------------------------------------------------------------------------|----------------------------------------------------------------------|---------------------------------------------------------------------------------------------|------------------------------------------------------------------------------|-------------------------------------------------------------------------|-------------------------------------------------------------------------------------------|-------------------------------------------------------------------------------------------|-------------------------------------------------------------------------|--|
|                                                                                                  | <b>Try147*</b>                                                 |                                                                                 | Glu72<br>Tyr39                                                       |                                                                                             | Ile94<br>Ser93`, 121<br>Thr145`                                              |                                                                         |                                                                                           |                                                                                           |                                                                         |  |
| <b><math>\pi</math>-alkyl/alky</b>                                                               | Ile211<br>Leu148<br>Pro192                                     | Ala163<br>Ile20<br>Leu148,<br><b>196*</b><br>Lys164<br>Met160<br><b>Try147*</b> |                                                                      |                                                                                             | Ile20`<br><b>Leu196*</b>                                                     | Lys134                                                                  | Ile20`<br>Ala15                                                                           |                                                                                           | Ala15<br>Ile20`<br><b>Leu196*</b>                                       |  |
| <b>VDW</b>                                                                                       | Glu210<br>Leu207,<br>208                                       | Ile94<br>Gly13<br>Ser19, 93<br>Thr145,<br>146                                   | Asn75<br>Asp66<br>Gln79<br>Gly76<br>Ile65<br>Leu62<br>Tyr63          | Ala15, 21`<br>Gly13`<br>Ile20, 94`<br><b>Leu196*</b><br>Thr145`<br><b>Tyr147*</b><br>Ser93` | Ala15<br>Arg40<br>Ile120<br>Thr146`<br>Tyr91, <b>147*</b><br>Ser19`<br>Val67 | Glu78, 131<br>Gly81, 85<br>Ile74<br>Leu135<br>Pro137                    | Ala21`<br>Ile14, 94`<br><b>Leu196*</b><br>Thr145,<br>146`<br>Tyr91`, <b>147*</b><br>Val24 |                                                                                           | Ala21`<br>Gly13`<br>Ser93`<br>Thr145,<br>146`<br>Tyr91`,<br><b>147*</b> |  |
| <b>Cytotoxic Molecular Docking</b>                                                               |                                                                |                                                                                 |                                                                      |                                                                                             |                                                                              |                                                                         |                                                                                           |                                                                                           |                                                                         |  |
| <b>3. <math>\beta</math>-Catenin (PDB ID: 7AFW)</b>                                              |                                                                |                                                                                 |                                                                      |                                                                                             |                                                                              |                                                                         |                                                                                           |                                                                                           |                                                                         |  |
|                                                                                                  | <b>C1</b>                                                      | <b>C2</b>                                                                       | <b>C3</b>                                                            | <b>C4</b>                                                                                   | <b>C5</b>                                                                    | <b>C6</b>                                                               | <b>C7</b>                                                                                 | <b>R9Q</b>                                                                                |                                                                         |  |
| <b>BFE<sup>a</sup> (kcal/mol)</b>                                                                | -4.3                                                           | -4.2                                                                            | -6.0                                                                 | -5.3                                                                                        | -5.1                                                                         | -5.0                                                                    | -5.9                                                                                      | -6.2                                                                                      |                                                                         |  |
| <b>Amide- <math>\pi</math>-stucked</b>                                                           |                                                                |                                                                                 |                                                                      |                                                                                             |                                                                              |                                                                         |                                                                                           | Gly245``                                                                                  |                                                                         |  |
| <b>HB</b>                                                                                        |                                                                | Gly245`<br>Lys242``,<br>281                                                     | Gln203                                                               | Thr201                                                                                      | Gln203<br><b>Thr205**</b>                                                    | Met202                                                                  | Asn204<br>Gln203                                                                          | <b>Asn206**</b><br><b>Thr205**</b>                                                        |                                                                         |  |
| <b><math>\pi</math>-alkyl/alky</b>                                                               | Lys242``<br><b>Pro247**</b>                                    | Lys242``<br><b>Pro247**</b>                                                     | Lys242``                                                             |                                                                                             | Lys242``                                                                     | Lys242``                                                                | Lys242``                                                                                  | <b>Pro247**</b>                                                                           |                                                                         |  |
| <b><math>\pi</math>-Sulphur</b>                                                                  |                                                                |                                                                                 |                                                                      |                                                                                             |                                                                              |                                                                         | <b>Met243**</b>                                                                           | <b>Met243**</b>                                                                           |                                                                         |  |
| <b>VDW</b>                                                                                       | Asn204<br>Gln203<br>Met202,<br><b>243**</b><br><b>Thr205**</b> | Gln203<br><b>Met243**</b>                                                       | <b>Asn204,</b><br><b>206**</b><br><b>Met243**</b><br><b>Thr205**</b> | Arg200<br>Asn161,<br>204<br>Asp162<br>Gln165<br>Leu160<br><b>Thr205**</b><br>Val204         | <b>Asn206**</b><br>Gly245``<br>Met202,<br><b>243**</b><br><b>Thr205**</b>    | Asn204<br>Gly203, 245``<br>Lys281<br><b>Met243**</b><br><b>Thr205**</b> | <b>Asn206**</b><br>Met202<br><b>Thr205**</b>                                              | Ala211<br><b>Asp207**</b><br>Lys242``<br><b>Ser246**</b><br>Val208,<br><b>248**</b> , 251 |                                                                         |  |
| <b>C:H bond</b>                                                                                  | <b>Asn206**</b>                                                |                                                                                 |                                                                      |                                                                                             |                                                                              |                                                                         |                                                                                           |                                                                                           |                                                                         |  |
| <b>4. Crystal structure of human dihydrofolate reductase (DHFR) bound to NADPH (PDB ID:4M6J)</b> |                                                                |                                                                                 |                                                                      |                                                                                             |                                                                              |                                                                         |                                                                                           |                                                                                           |                                                                         |  |

|                                                          | C1                                                                                                                                       | C2                                                                                                                                                                                | C3                                                                                     | C4                                                                                                              | C5                                                                                                              | C6                                                                                              | C7                                                                                     | NDP                                                                                                                             | Metho                                                                                                                                         | Cipro                                                                                   |
|----------------------------------------------------------|------------------------------------------------------------------------------------------------------------------------------------------|-----------------------------------------------------------------------------------------------------------------------------------------------------------------------------------|----------------------------------------------------------------------------------------|-----------------------------------------------------------------------------------------------------------------|-----------------------------------------------------------------------------------------------------------------|-------------------------------------------------------------------------------------------------|----------------------------------------------------------------------------------------|---------------------------------------------------------------------------------------------------------------------------------|-----------------------------------------------------------------------------------------------------------------------------------------------|-----------------------------------------------------------------------------------------|
| <b>BFE<sup>a</sup> (kcal/mol)</b>                        | -4.4                                                                                                                                     | -3.8                                                                                                                                                                              | -5.1                                                                                   | -4.5                                                                                                            | -5.3                                                                                                            | -4.9                                                                                            | -6.3                                                                                   | -7.1                                                                                                                            | -7.1                                                                                                                                          | -5.5                                                                                    |
| <b>Amide- <math>\pi</math>-stucked</b>                   |                                                                                                                                          |                                                                                                                                                                                   |                                                                                        |                                                                                                                 |                                                                                                                 |                                                                                                 | <b>Ser118<sup>***</sup></b>                                                            |                                                                                                                                 |                                                                                                                                               | <b>Ser118<sup>***</sup></b>                                                             |
| <b>HB</b>                                                | <b>Gly20<sup>***</sup></b>                                                                                                               | <b>Gly20<sup>***</sup></b>                                                                                                                                                        | <b>Ser118<sup>***</sup></b><br><b>Gly20<sup>**</sup></b><br>(DDB)                      | <b>Gly20<sup>***</sup></b><br>(DDB)                                                                             | Asp145<br><b>Gly20<sup>**</sup></b><br>Ser118<br><b>Thr146<sup>***</sup></b>                                    | Asp145<br>Ser118, <b>119<sup>***</sup></b>                                                      | <b>Arg77<sup>***</sup></b><br>Ser118<br><b>Glu123<sup>***</sup></b><br>(AAB)           | <b>Glu123<sup>***</sup></b><br><b>Lys55<sup>***</sup></b><br>Ser118,<br><b>119<sup>***</sup></b><br><b>Thr146<sup>***</sup></b> | Asp145<br>Glu123<br><b>Gly20<sup>***</sup></b>                                                                                                | Lys122<br><b>Ser118<sup>***</sup></b><br>Thr146                                         |
| <b><math>\pi</math>-alkyl/alky</b>                       | Lys122 <sup>***</sup>                                                                                                                    | Lys122 <sup>***</sup>                                                                                                                                                             |                                                                                        |                                                                                                                 |                                                                                                                 |                                                                                                 | Lys122 <sup>***</sup><br>Ser118                                                        |                                                                                                                                 | Lys122 <sup>***</sup>                                                                                                                         |                                                                                         |
| <b>VDW</b>                                               | Asp145<br><b>Gly17<sup>***</sup></b><br><b>Lys55<sup>***</sup></b><br>Ser118,<br><b>119<sup>***</sup></b><br><b>Thr146<sup>***</sup></b> | Asn19<br>Asp145<br><b>Gly17<sup>***</sup></b><br>Ser118,<br><b>119<sup>***</sup></b><br><b>Thr146<sup>***</sup></b>                                                               | Asn19<br>Asp145<br>Lys18<br><b>Ser119<sup>***</sup></b><br><b>Thr146<sup>***</sup></b> | Asn19<br>Asp21, 145<br><b>Lys55<sup>***</sup></b><br><b>Ser118<sup>***</sup></b><br><b>Thr146<sup>***</sup></b> | Asn19<br><b>Lys55<sup>***</sup></b> ,<br>122<br><b>Ser119<sup>***</sup></b>                                     | Asn19<br><b>Gly20<sup>***</sup></b><br>Lys18<br><b>Thr146<sup>***</sup></b>                     | Asn126<br><b>Ser119<sup>***</sup></b>                                                  | <b>Arg77<sup>***</sup></b><br>Lys122 <sup>***</sup><br>Phe147<br><b>Val120<sup>***</sup></b>                                    | Arg77 <sup>***</sup><br>Asn19, 126<br>Lys18,<br><b>55<sup>***</sup></b><br>Ser118,<br><b>119<sup>***</sup></b><br><b>Thr146<sup>***</sup></b> | <b>Arg77<sup>***</sup></b><br><b>Lys55<sup>***</sup></b><br><b>Ser119<sup>***</sup></b> |
| <b>5. Crystal structure of human P-gp (PDB ID: 6C0V)</b> |                                                                                                                                          |                                                                                                                                                                                   |                                                                                        |                                                                                                                 |                                                                                                                 |                                                                                                 |                                                                                        |                                                                                                                                 |                                                                                                                                               |                                                                                         |
|                                                          | C1                                                                                                                                       | C2                                                                                                                                                                                | C3                                                                                     | C4                                                                                                              | C5                                                                                                              | C6                                                                                              | C7                                                                                     | ATP                                                                                                                             | DOXO                                                                                                                                          |                                                                                         |
| <b>BFE<sup>a</sup> (kcal/mol)</b>                        | -6.9                                                                                                                                     | -6.9                                                                                                                                                                              | -7.7                                                                                   | -6.5                                                                                                            | -8.4                                                                                                            | -6.1                                                                                            | -8.0                                                                                   | -7.0                                                                                                                            | -8.2                                                                                                                                          |                                                                                         |
| <b>HB</b>                                                | Ala729 <sup>****</sup><br><b>Ser979<sup>****</sup></b>                                                                                   |                                                                                                                                                                                   |                                                                                        |                                                                                                                 |                                                                                                                 | Ile736 <sup>****</sup>                                                                          | Ala729 <sup>****</sup><br><b>Phe336<sup>****</sup></b>                                 | Ala729<br>Leu332<br>Phe732<br>Ser979                                                                                            | Leu332<br><b>Phe336<sup>****</sup></b>                                                                                                        |                                                                                         |
| <b><math>\pi</math>-alkyl/alky</b>                       | Ile735 <sup>****</sup><br>Leu332,<br>339 <sup>****</sup><br>Phe314,<br><b>335<sup>****</sup></b> ,<br><b>728<sup>****</sup></b> ,<br>759 | Ile735 <sup>****</sup><br>Leu332 <sup>****</sup> ,<br>339, 976<br><b>Phe72<sup>****</sup></b> ,<br><b>728<sup>****</sup></b> ,<br>759,<br><b>983<sup>****</sup></b> ,<br>335, 314 | Leu339 <sup>****</sup><br><b>Phe335<sup>****</sup></b>                                 |                                                                                                                 | Ile731, 735<br>Leu339<br>Phe759 <sup>****</sup><br>( $\pi$ - $\pi$<br>stucked),<br><b>Phe335<sup>****</sup></b> | <b>Phe335<sup>****</sup></b> , 759 <sup>****</sup><br>( $\pi$ - $\pi$ stucked)                  | Leu332 <sup>****</sup>                                                                 |                                                                                                                                 | Ile736<br>Leu332                                                                                                                              |                                                                                         |
| <b><math>\pi</math>-<math>\sigma</math></b>              |                                                                                                                                          |                                                                                                                                                                                   | Phe759                                                                                 | <b>Phe 335<sup>****</sup></b>                                                                                   |                                                                                                                 |                                                                                                 |                                                                                        |                                                                                                                                 |                                                                                                                                               |                                                                                         |
| <b>VDW</b>                                               | Ala729 <sup>****</sup><br>Ile736 <sup>****</sup><br>Leu976<br>Phe336,<br><b>983<sup>****</sup></b>                                       | Ala729 <sup>****</sup><br><b>Ile340<sup>****</sup></b><br>Phe336,<br>732<br><b>Ser979<sup>****</sup></b>                                                                          | Ile731 <sup>****</sup> ,<br>735<br>Phe314,<br>728,<br><b>732<sup>****</sup></b>        | Ile731 <sup>****</sup><br>Leu332,<br>339<br><b>Phe336<sup>****</sup></b> ,<br><b>728<sup>****</sup></b> ,       | Ala729 <sup>****</sup><br>Glu972<br><b>Ile736</b> ,<br><b>340<sup>****</sup></b>                                | Ile735 <sup>****</sup><br>Leu339 <sup>****</sup><br>Phe314, <b>732<sup>****</sup></b><br>Tyr310 | Ile731,<br>735 <sup>****</sup><br>Leu339<br>Phe72, 314,<br><b>335<sup>****</sup></b> , | Ile731,<br>735, 736<br>Leu339,<br>976                                                                                           | Ala729<br>Glu972<br>Ile340,<br>731, 735                                                                                                       |                                                                                         |

|  |  |        |                |                                                   |                                                                                                                                                                                                                                |  |                                                                                             |                                                                                                                                               |                                                                                                                                    |  |
|--|--|--------|----------------|---------------------------------------------------|--------------------------------------------------------------------------------------------------------------------------------------------------------------------------------------------------------------------------------|--|---------------------------------------------------------------------------------------------|-----------------------------------------------------------------------------------------------------------------------------------------------|------------------------------------------------------------------------------------------------------------------------------------|--|
|  |  | Tyr310 | Tyr307,<br>310 | <b>732</b> <sup>***</sup> ,<br>314, 759<br>Val331 | Leu332 <sup>'''</sup> ,<br><b>975</b> <sup>***</sup> , 976<br>Phe72 <sup>***</sup> ,<br><b>336</b> <sup>***</sup> ,<br>728 <sup>***</sup> ,<br>732,<br><b>983</b> <sup>***</sup> , 314<br>Ser733,<br><b>979</b> <sup>***</sup> |  | 728, 732 <sup>'''</sup> ,<br>759, <b>983</b> <sup>***</sup><br><b>Ser979</b> <sup>***</sup> | <b>Phe72</b> <sup>***</sup> ,<br>314, 335,<br><b>336</b> <sup>***</sup> ,<br><b>728</b> <sup>***</sup> ,<br>759,<br><b>983</b> <sup>***</sup> | Leu339,<br>976<br><b>Phe72</b> <sup>***</sup> ,<br>314, 335,<br><b>728</b> <sup>***</sup> ,<br>759<br><b>Ser979</b> <sup>***</sup> |  |
|--|--|--------|----------------|---------------------------------------------------|--------------------------------------------------------------------------------------------------------------------------------------------------------------------------------------------------------------------------------|--|---------------------------------------------------------------------------------------------|-----------------------------------------------------------------------------------------------------------------------------------------------|------------------------------------------------------------------------------------------------------------------------------------|--|

<sup>a</sup>RMSD < 2; BFE: Binding free energy (kcal/mol); CB=Covalent bond; HB= Hydrogen Bond/ Hydrogen-carbon bond; DDB= unfavorable donor-donor bond; AAB= unfavorable acceptor-acceptor bond; Ha.B= Halogen bond;  $\pi$ = Pi;  $\sigma$ = Sigma; VDW= Van Dar Waals; **CBN**= Clorobiocin (reference ligand ID:1KZN); **TRI**= Triclosan (reference ligand ID: 3GNS); **R9Q**= 3-[(2-R)-4-methyl-5-oxidanylidene-2,3-dihydro-1,4-benzoxazepin-2-yl]benzenecarbonitrile (reference ligand ID: 7AFW); **NADPH**= dihydro-nicotinamide-adenine-dinucleotide phosphate (PDB ID:4M6J); and **DOXO**= Doxorubicin (PubChem ID: 31703), and **ATP**= Adenosine-5'-triphosphate (reference ligand ID:6C0V); \* [52], \*\* [33], \*\*\* [34], \*\*\*\* [21], ' , '' , ''' shown with co-crystalized ligand. Amino acid residues in bold are reported before as crucial residues.



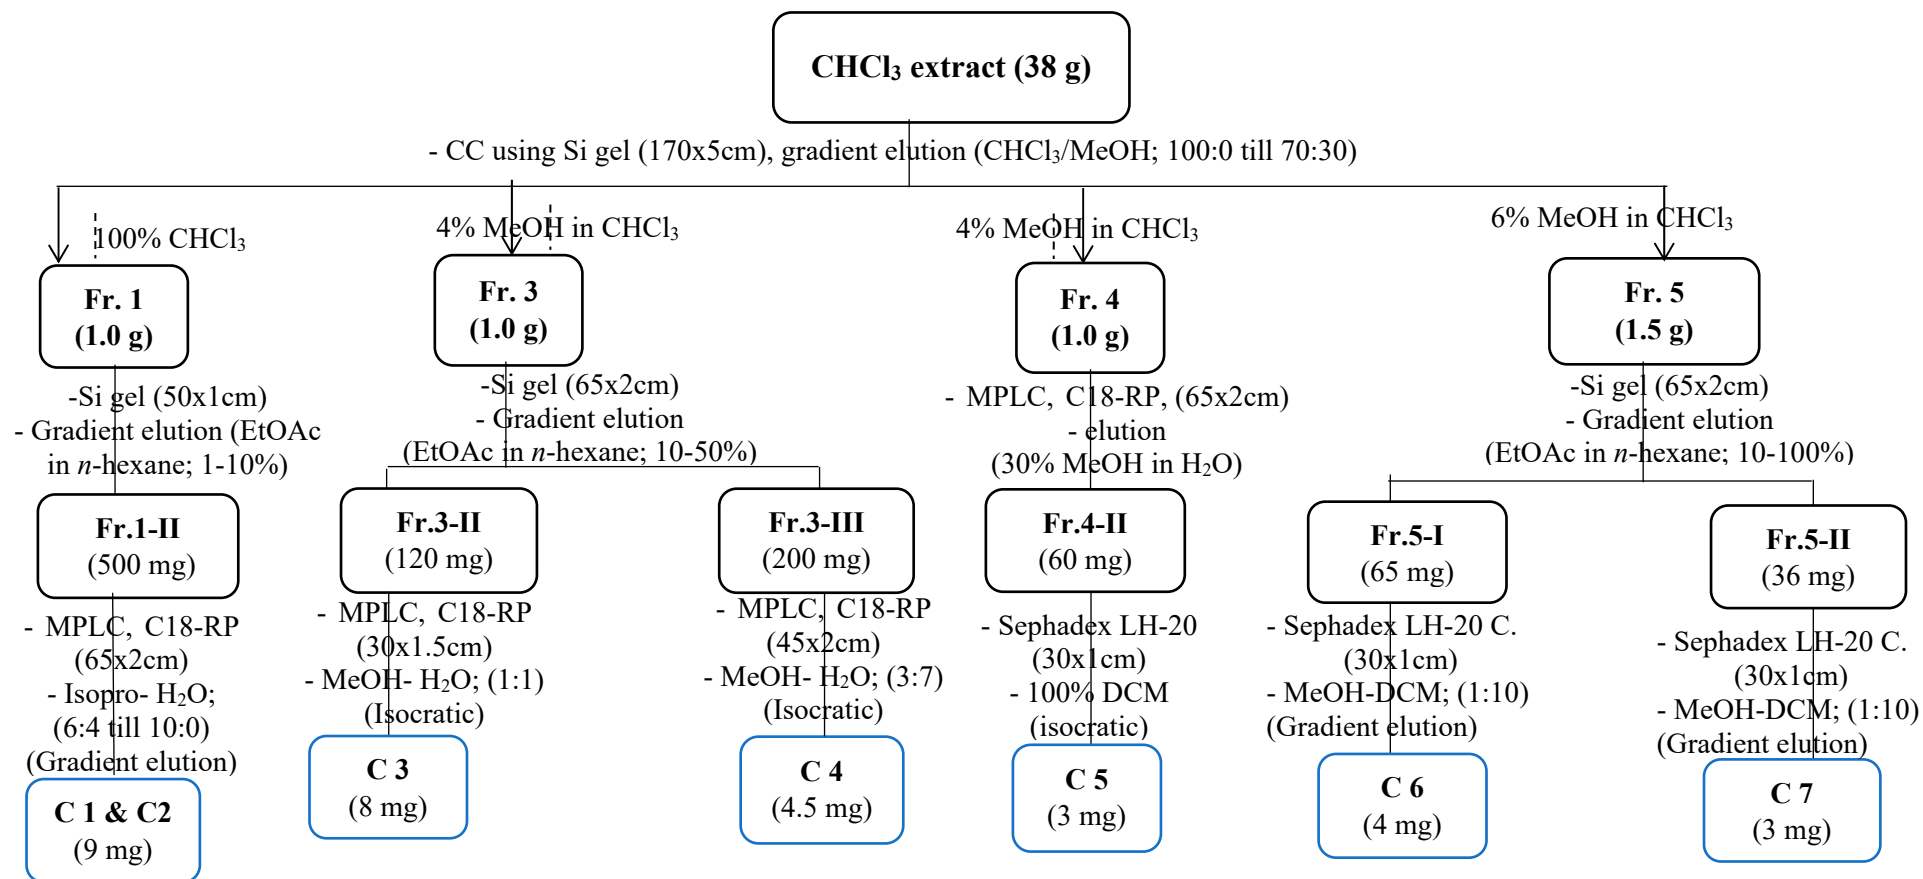

**Flowchart S1.** Fractionation and purification of the CHCl<sub>3</sub> extract of the *E. erinaceus* aerial flowering parts.

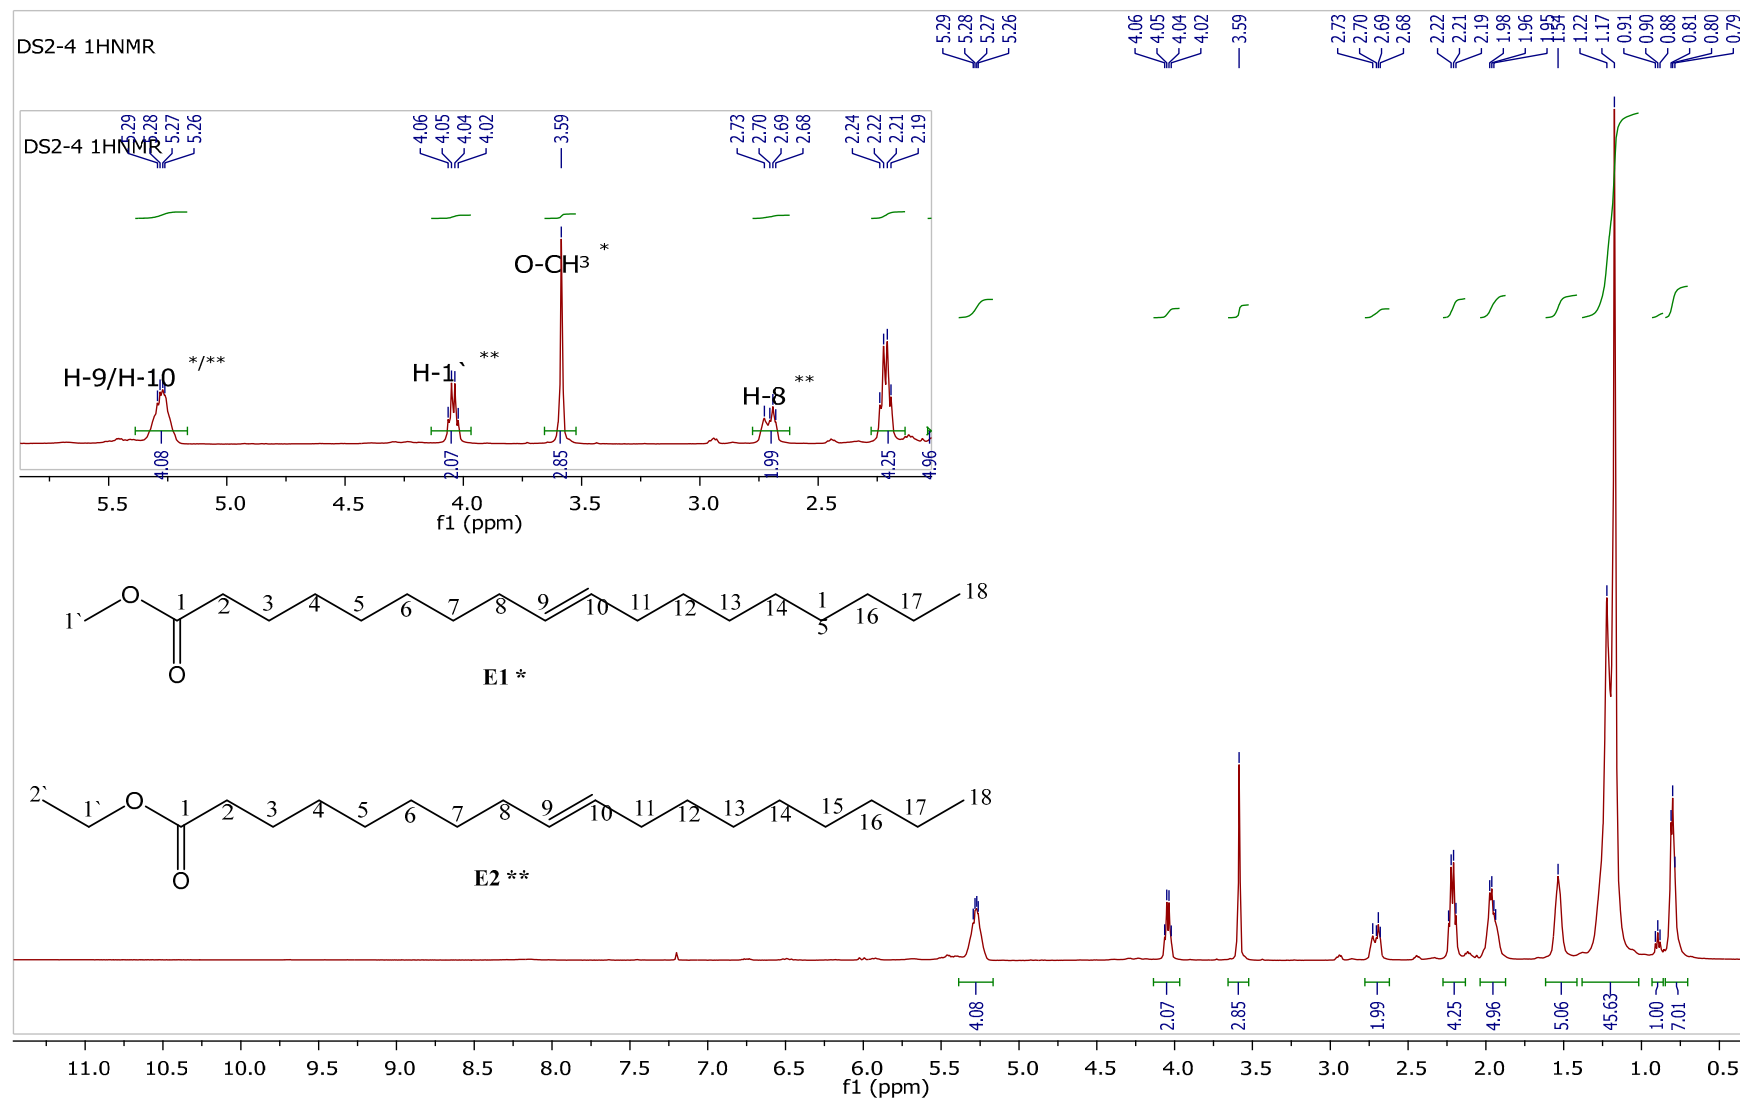

**Fig. S1.** <sup>1</sup>H-NMR spectrum of mixture of compounds **C1\*** and **C2\*\*** in CDCl<sub>3</sub>.

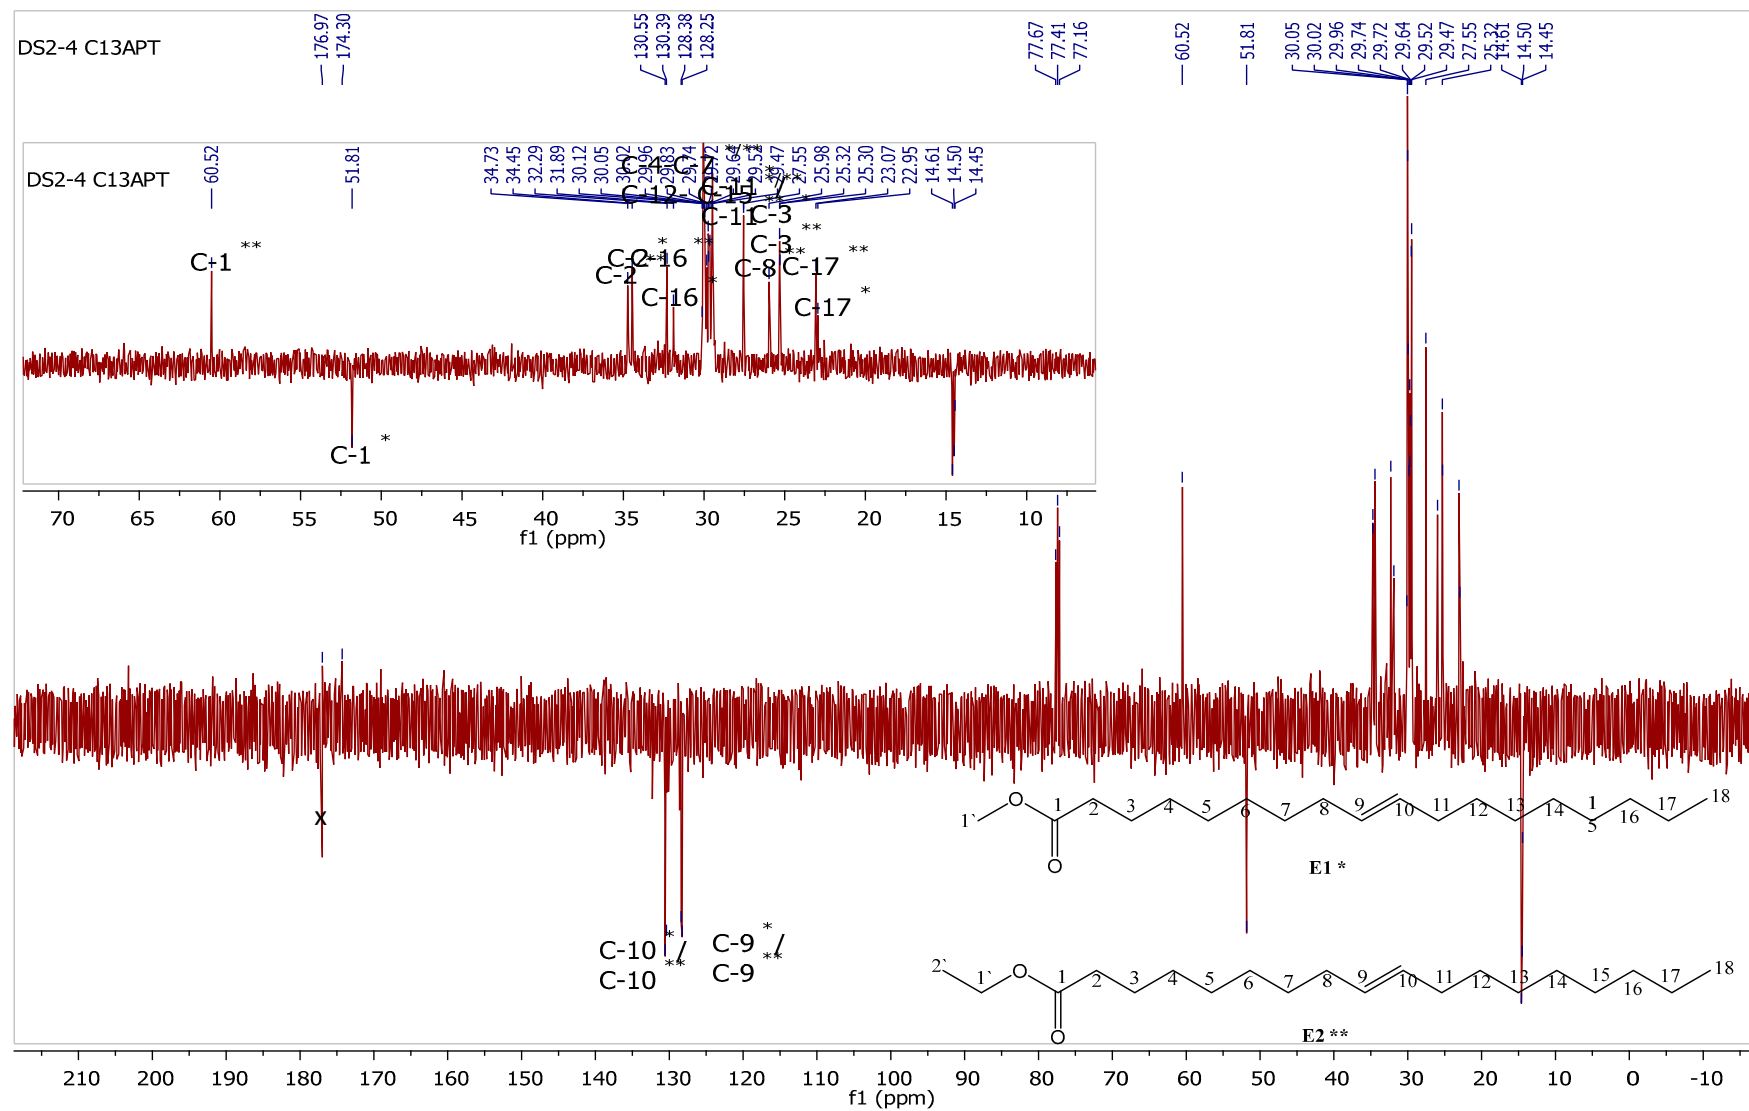

Fig. S2. APT spectrum of mixture of compounds **C1\*** and **C2\*\*** in  $\text{CDCl}_3$ .

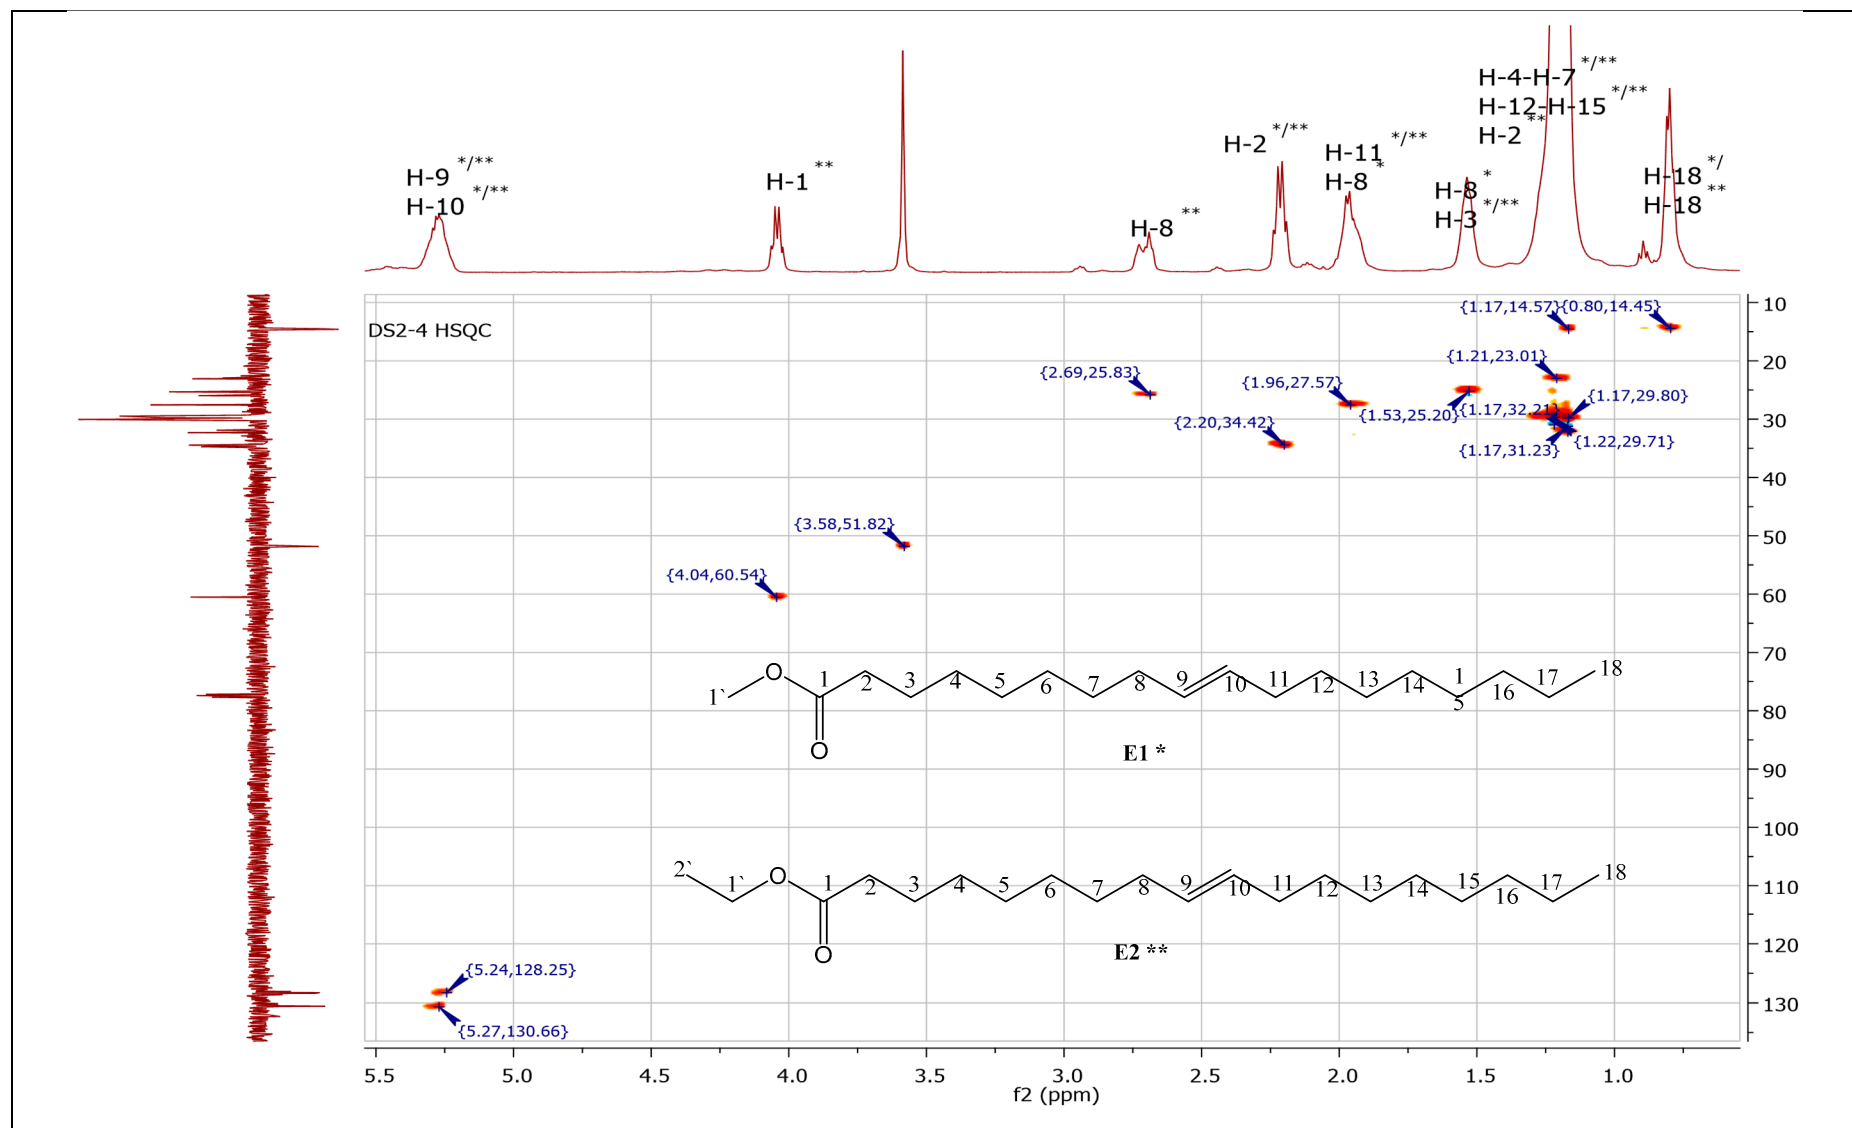

**Fig. S3.** HSQC spectrum (expansion; 0.5-5.5 ppm) of mixture of compounds **C1\*** and **C2\*\*** in  $\text{CDCl}_3$ .

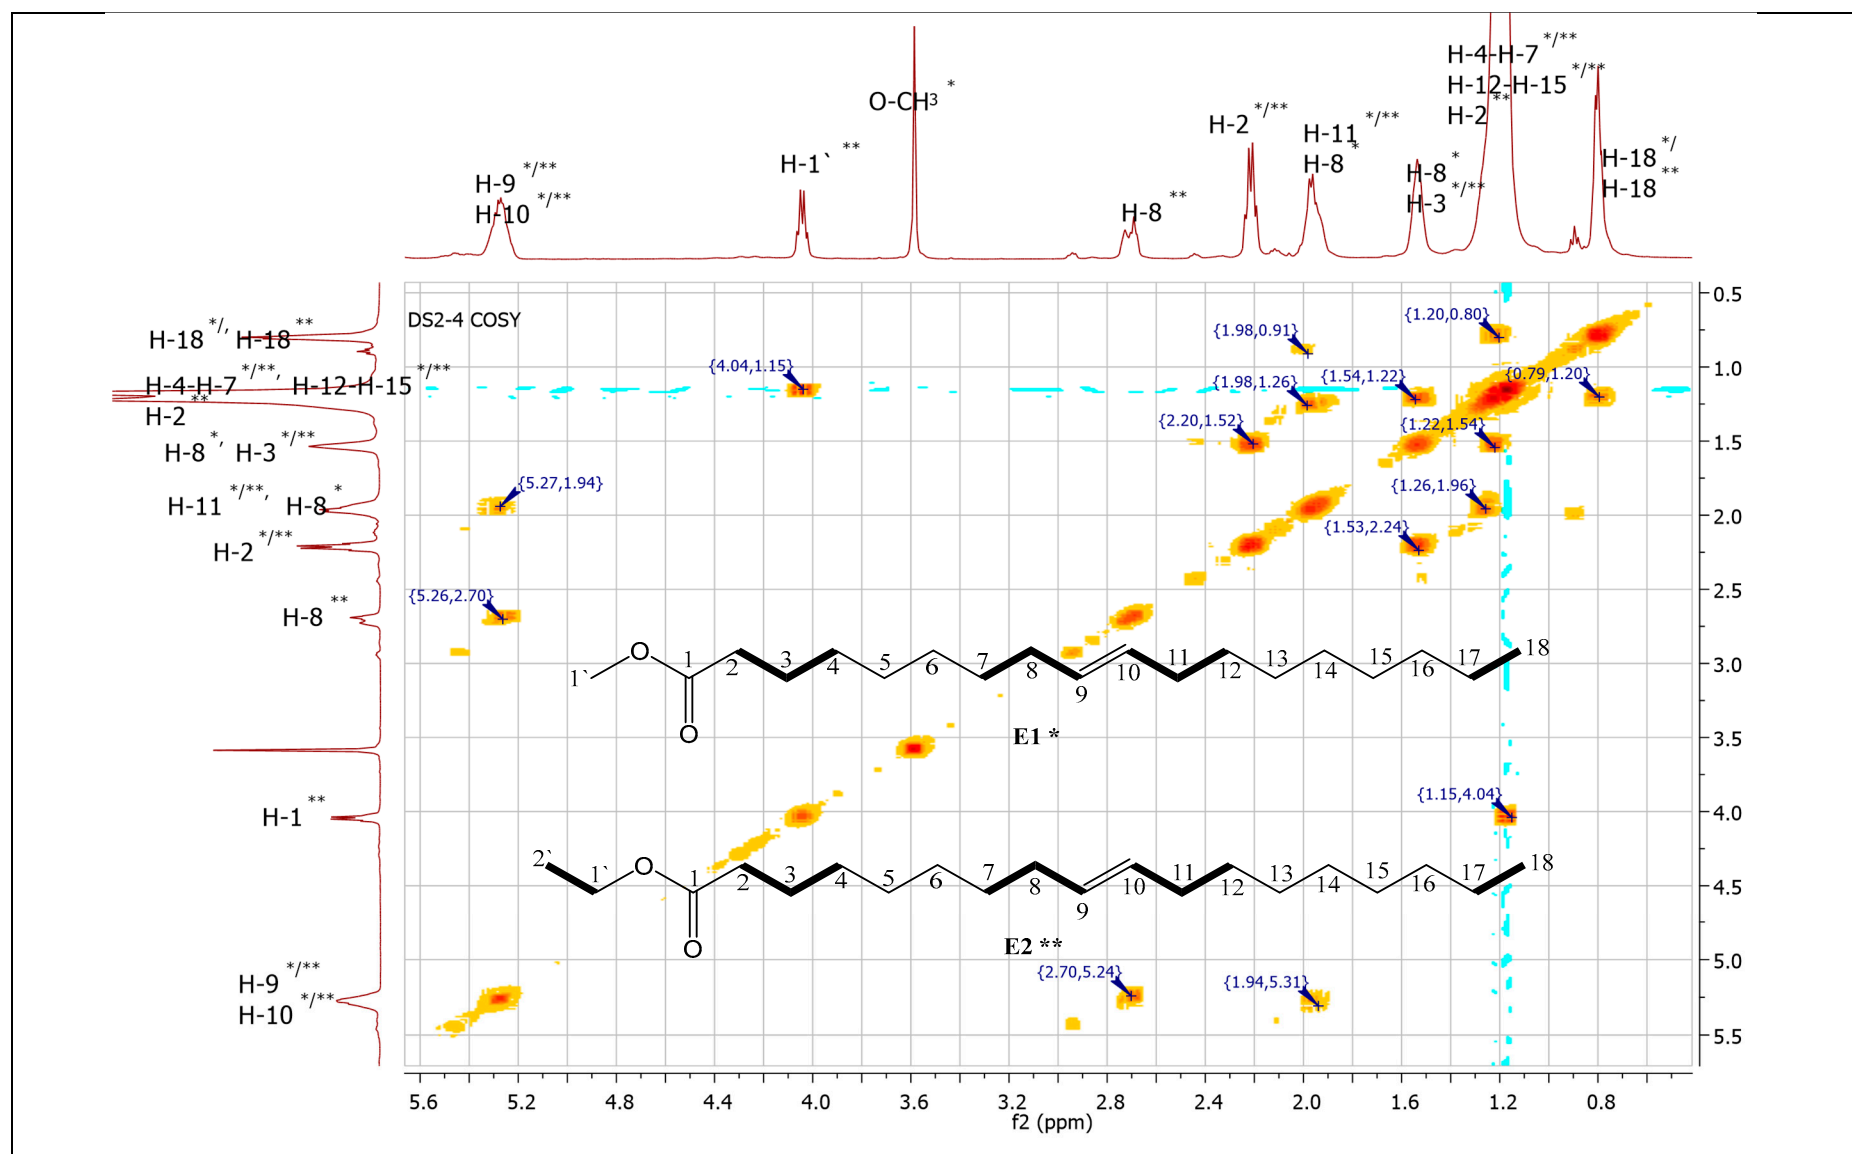

**Fig. S4.** COSY spectrum (expansion; 0.6-5.6 ppm) of mixture of compounds **C1\*** and **C2\*\*** in CDCl<sub>3</sub>.

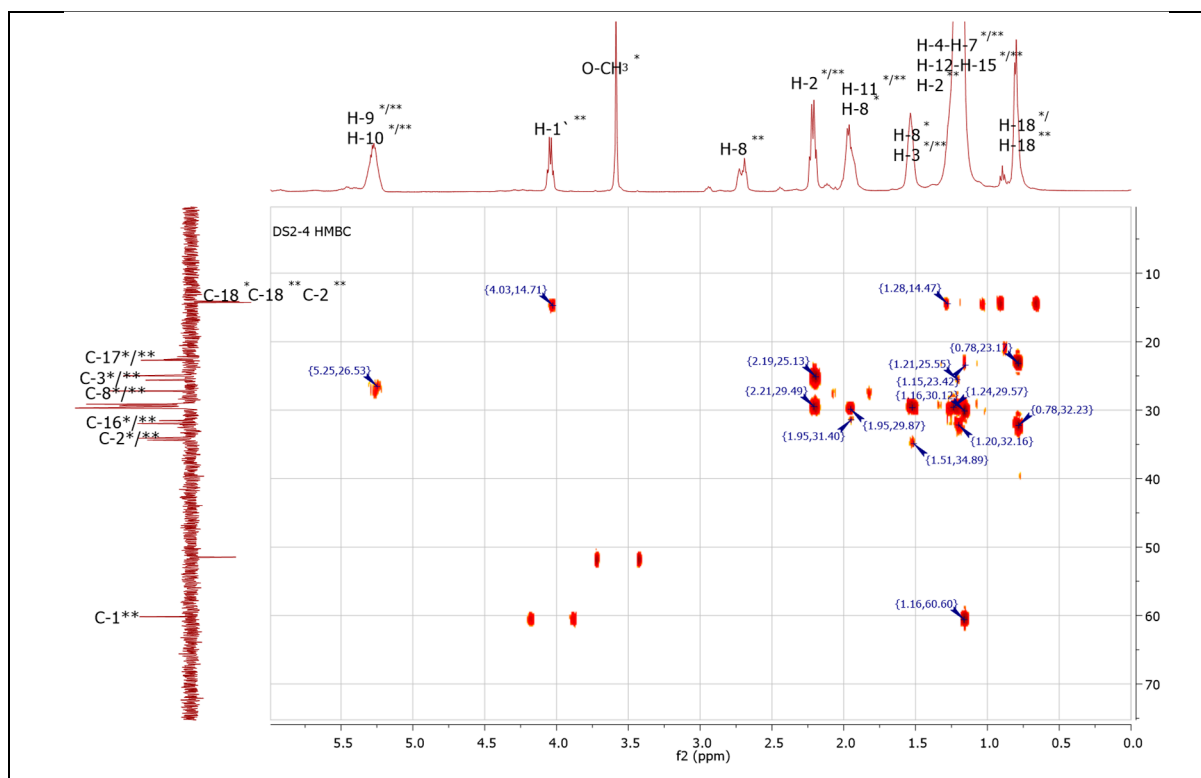

Expansion; 0-6.0 ppm

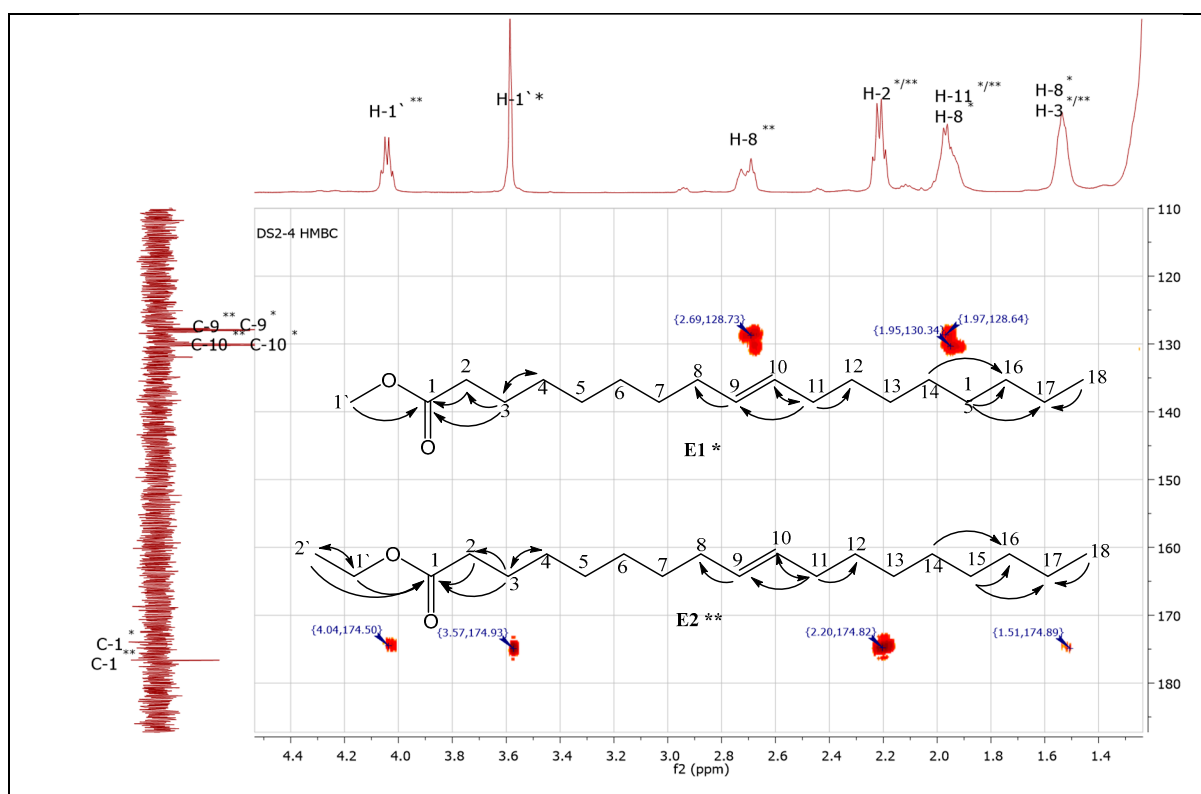

Expansion; 1.3-4.4 ppm

**Fig. S5.** HMBC spectrum (expansion; 0-6.0 and 1.3-4.4 ppm) of mixture of compounds C1\* and C2\*\* in CDCl<sub>3</sub>.

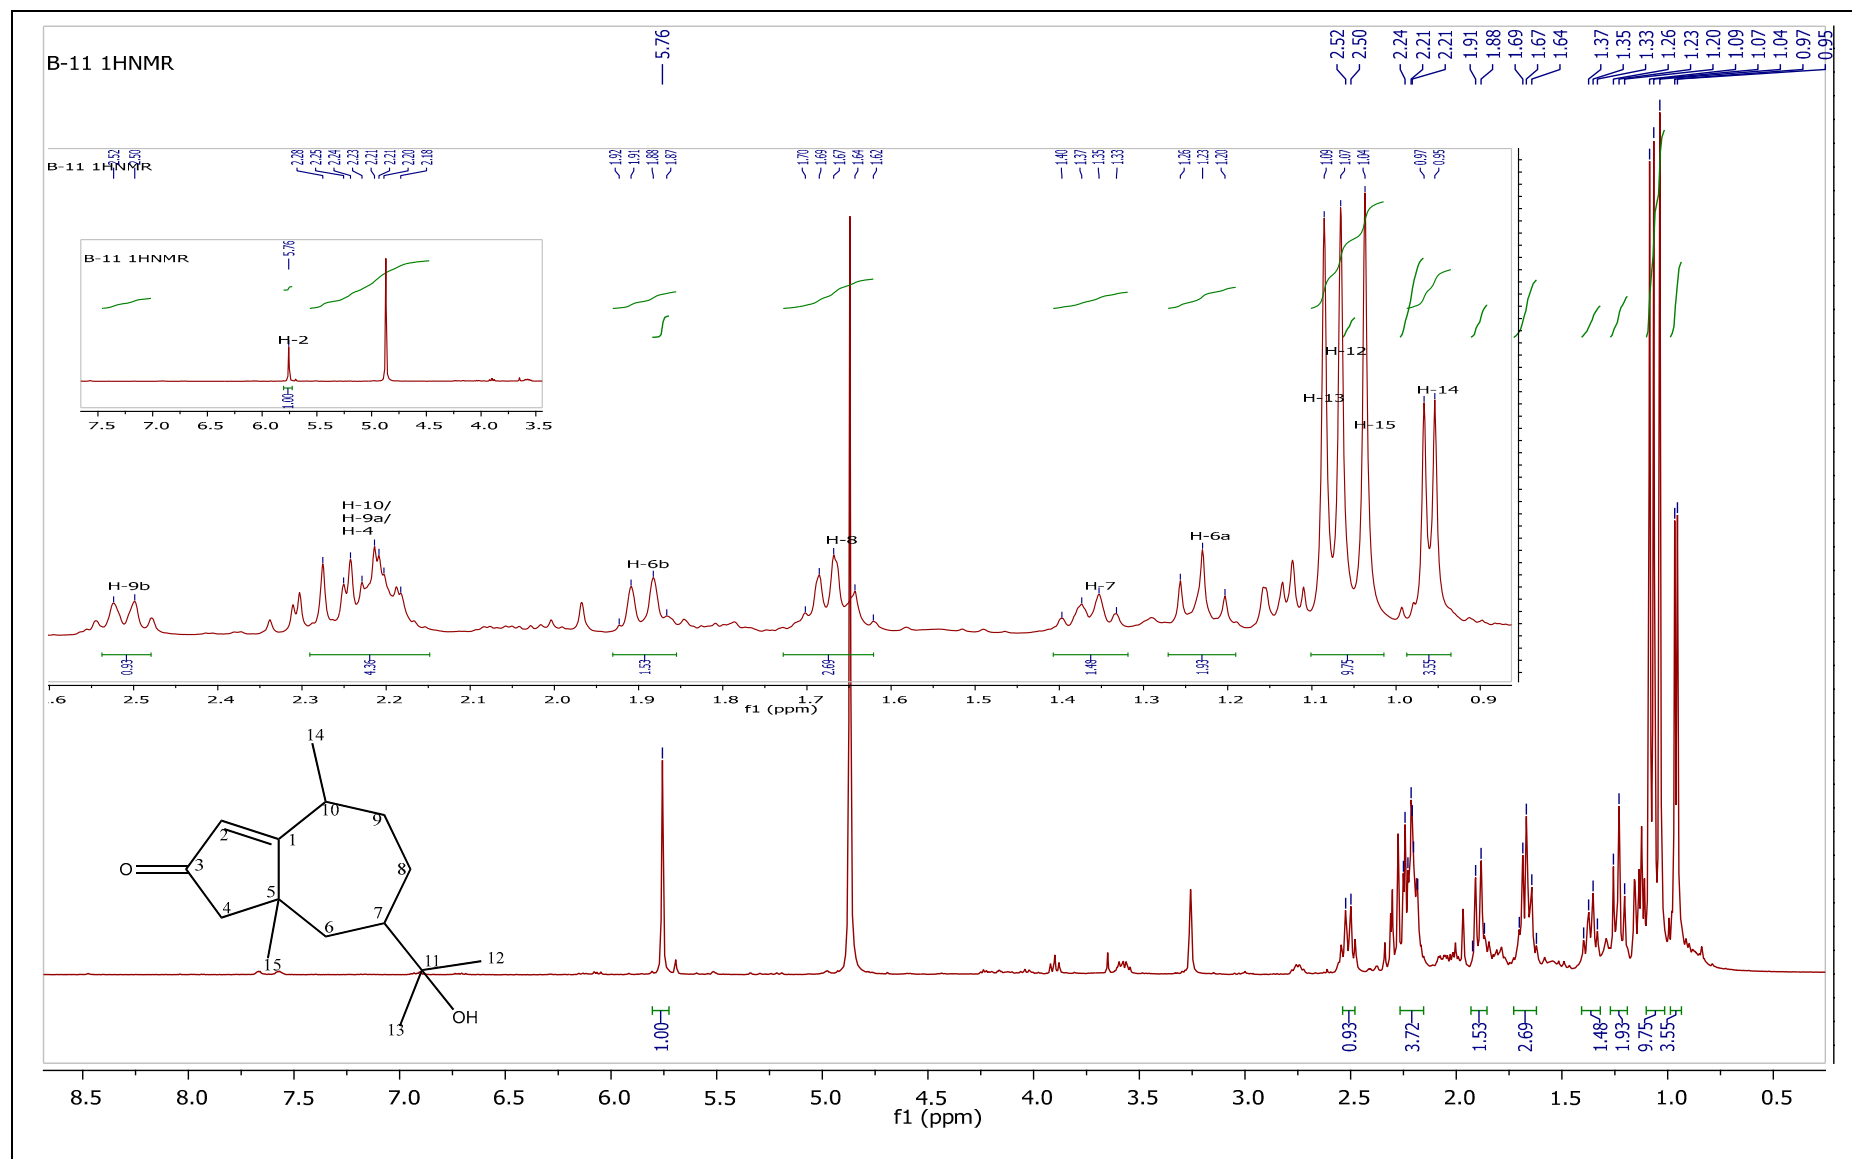

**Fig. S6.**  $^1\text{H}$ -NMR spectrum (expansion; 0.5-8.5, 0.9-2.6, 3.5-7.5 ppm) of **C3** in  $\text{CD}_3\text{OD}$ .

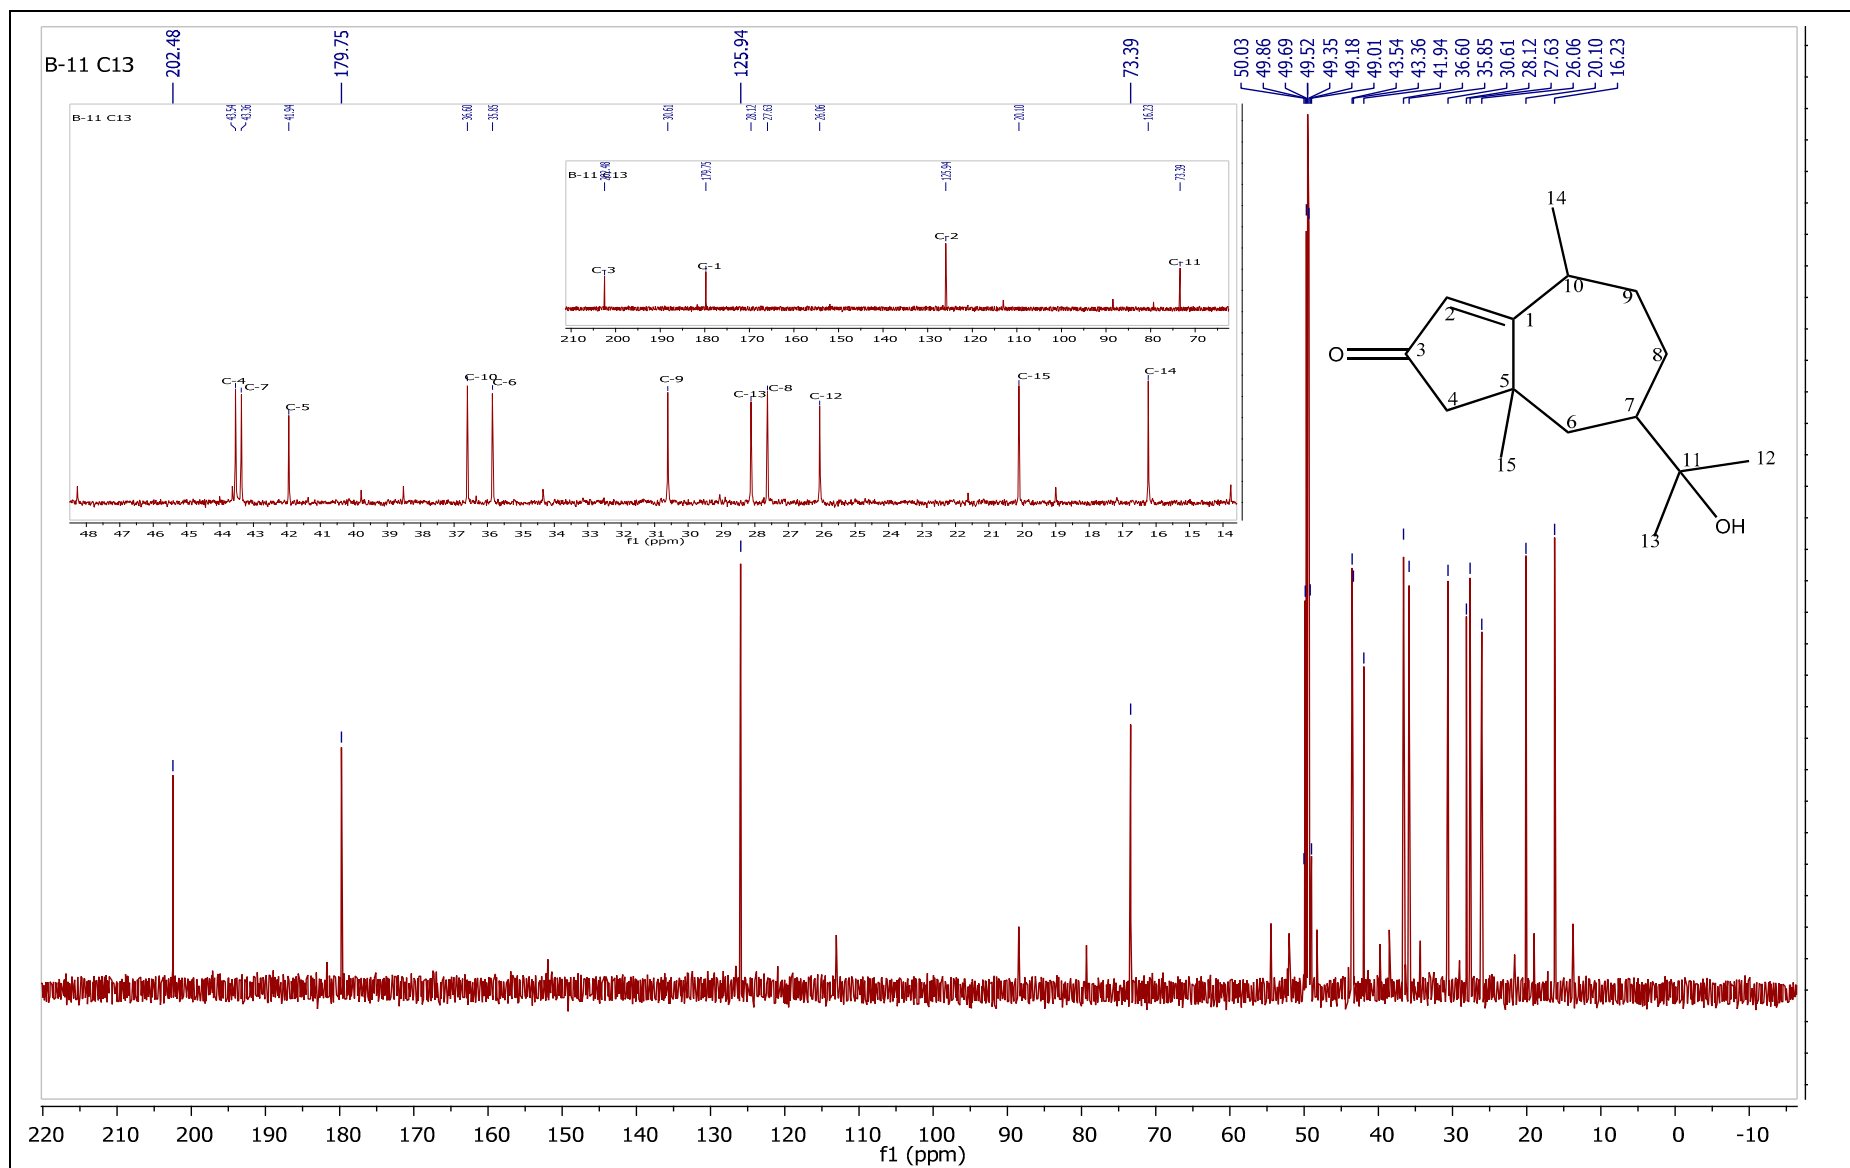

Fig. S7.  $^{13}\text{C}$ -NMR spectrum of C3 in  $\text{CD}_3\text{OD}$ .



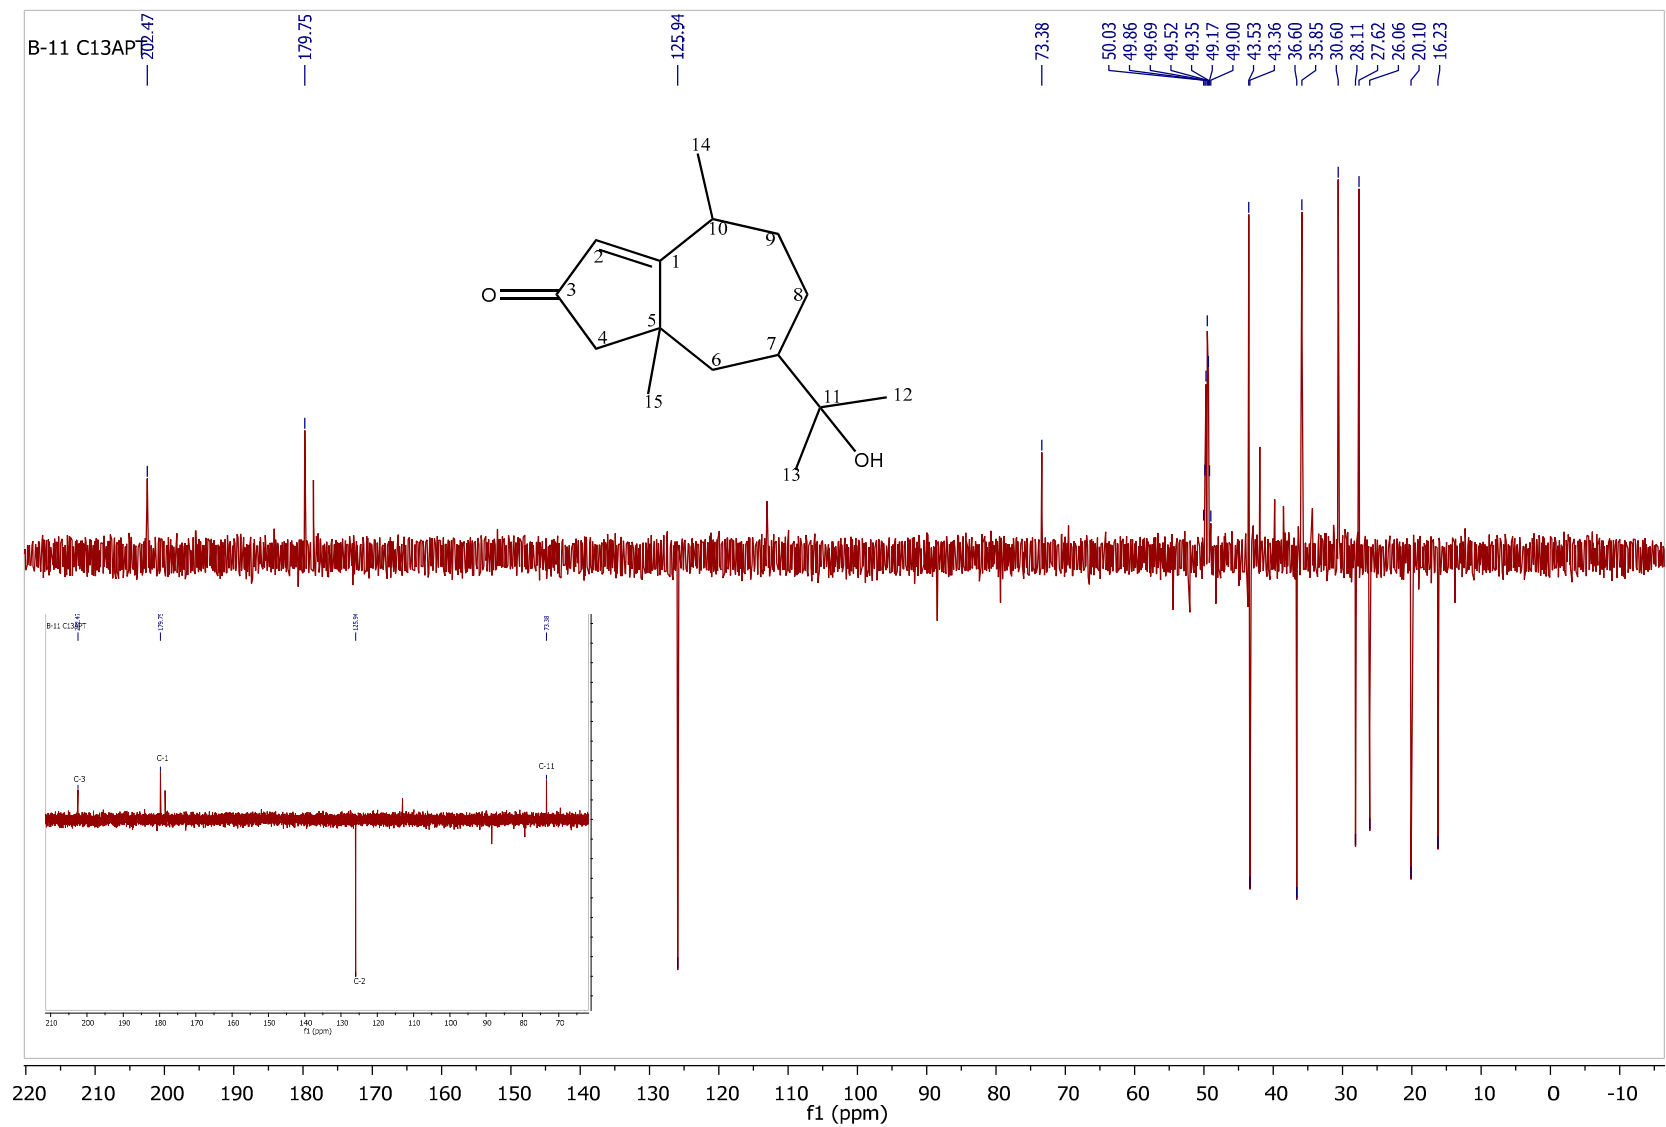

Fig. S8. APT spectrum of C3 in CD<sub>3</sub>OD.

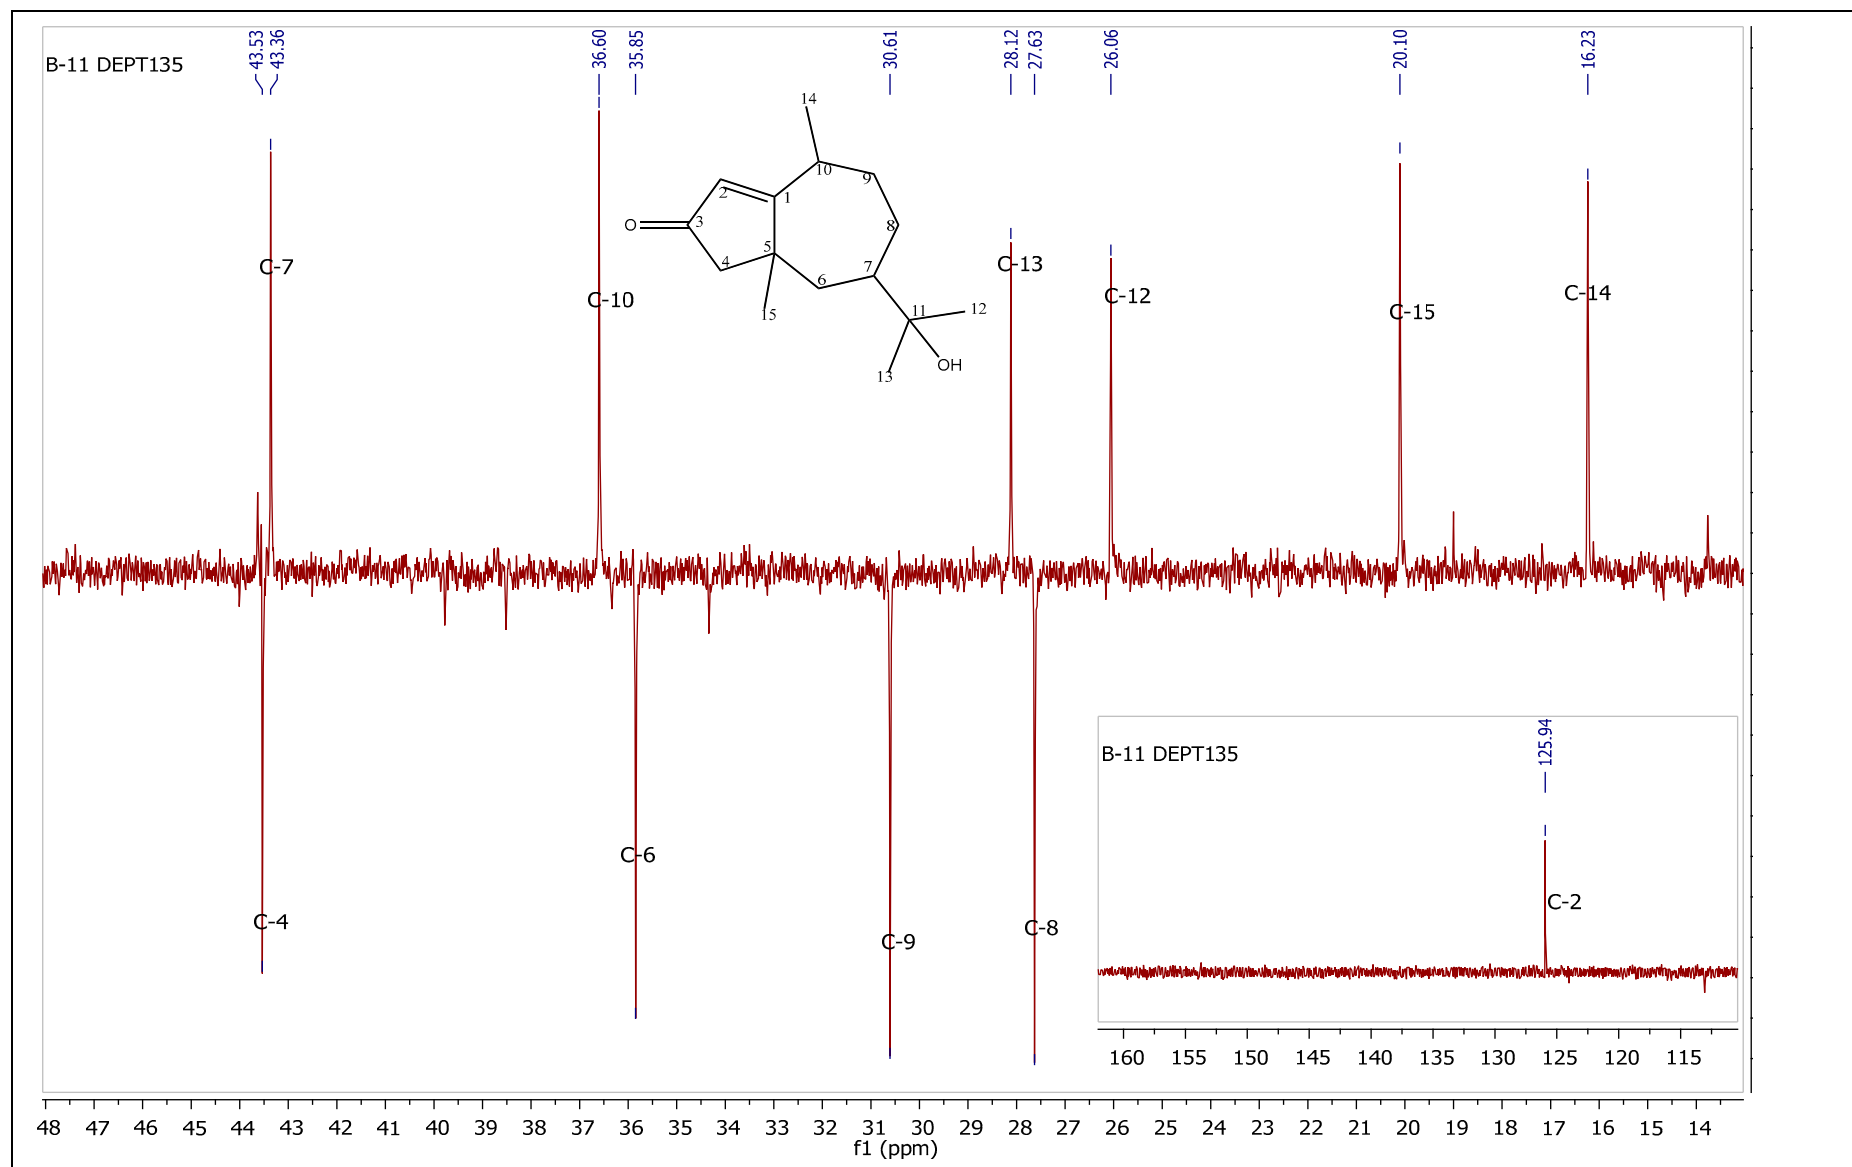

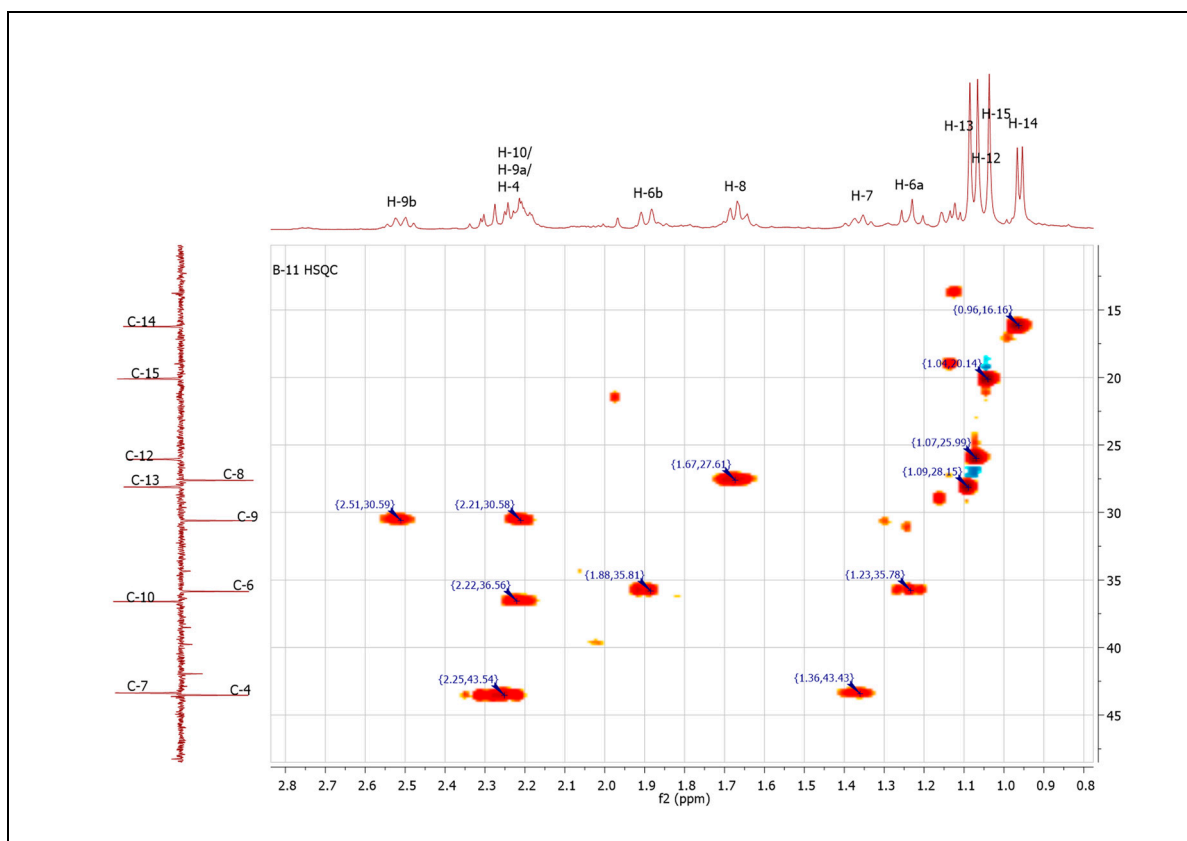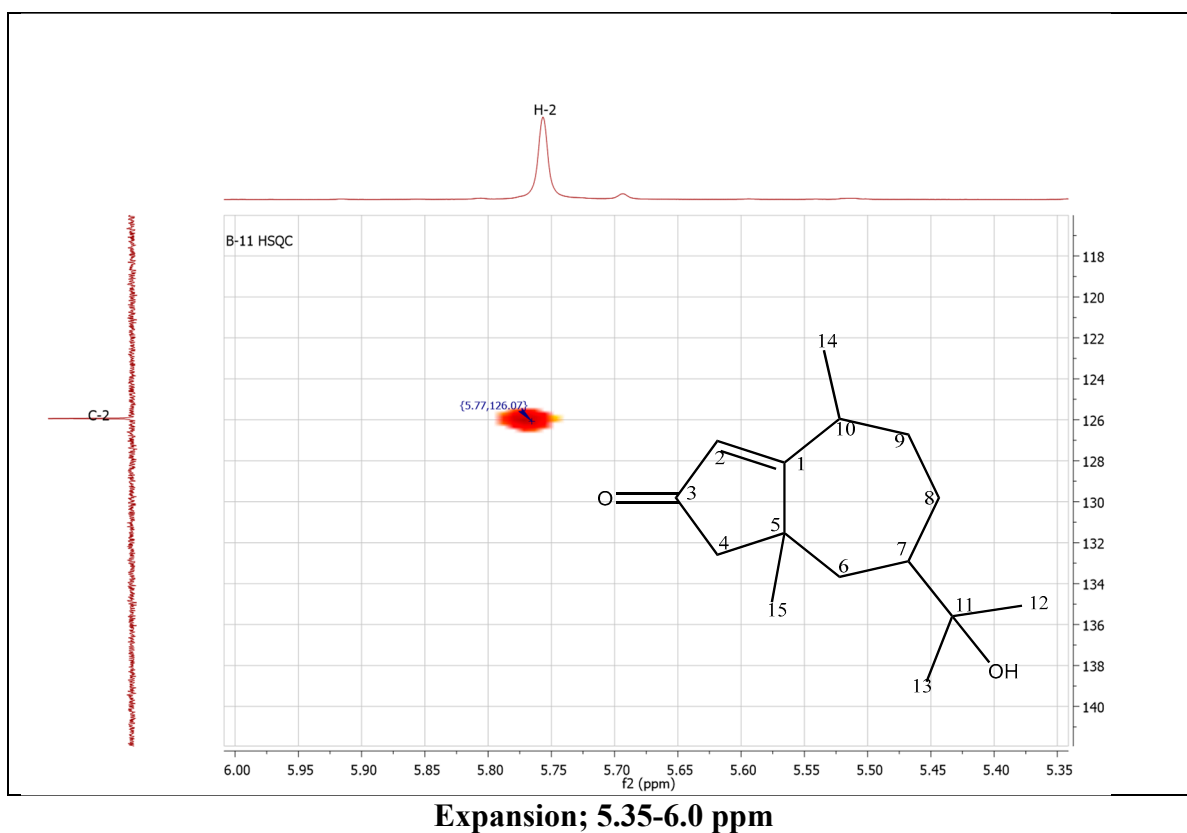

**Fig. S10.** HSQC-NMR spectrum (expansion; 0.8-2.8 and 5.35-6.0 ppm) of **C3** in CD<sub>3</sub>OD.

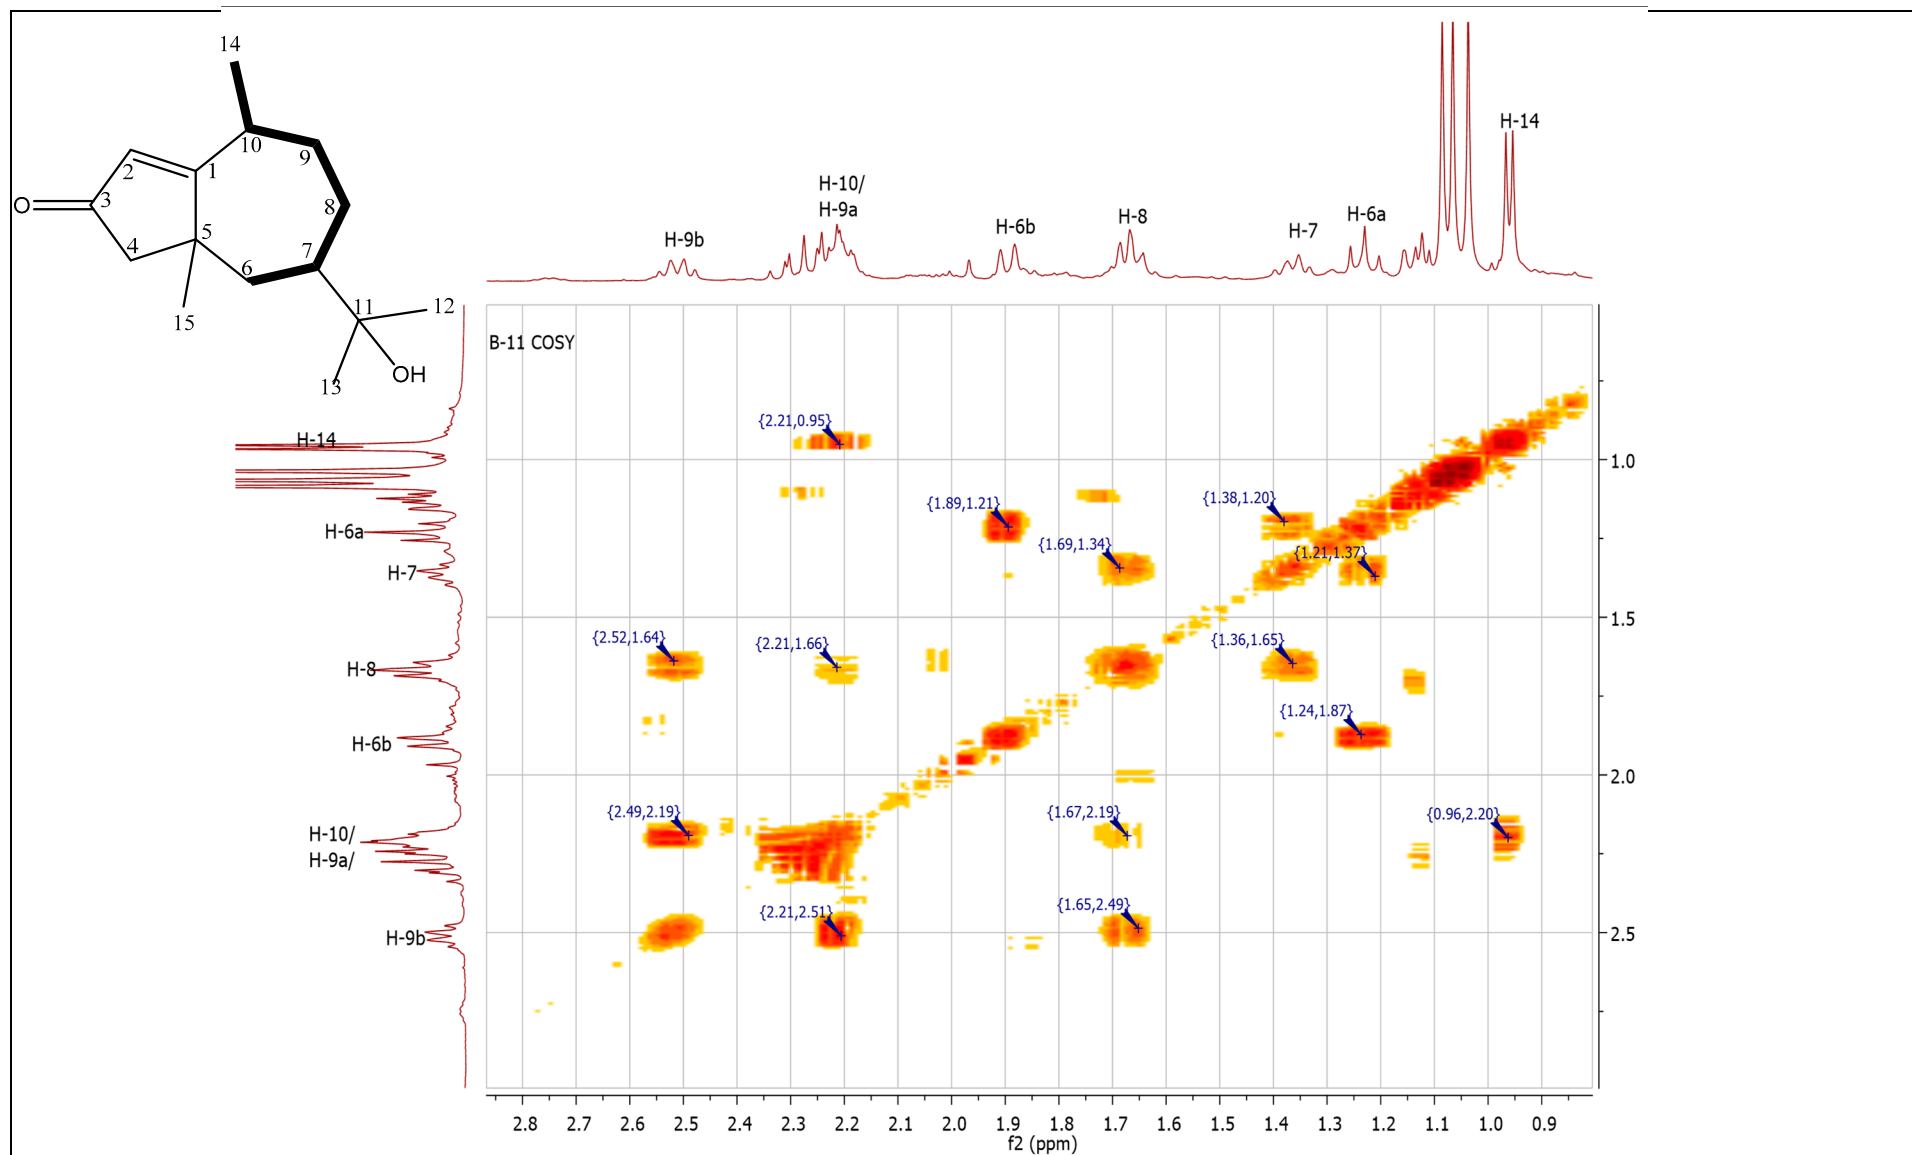

**Fig. S11.** COSY spectrum (expansion; 0.9-2.8 ppm) of C3 in CD<sub>3</sub>OD.

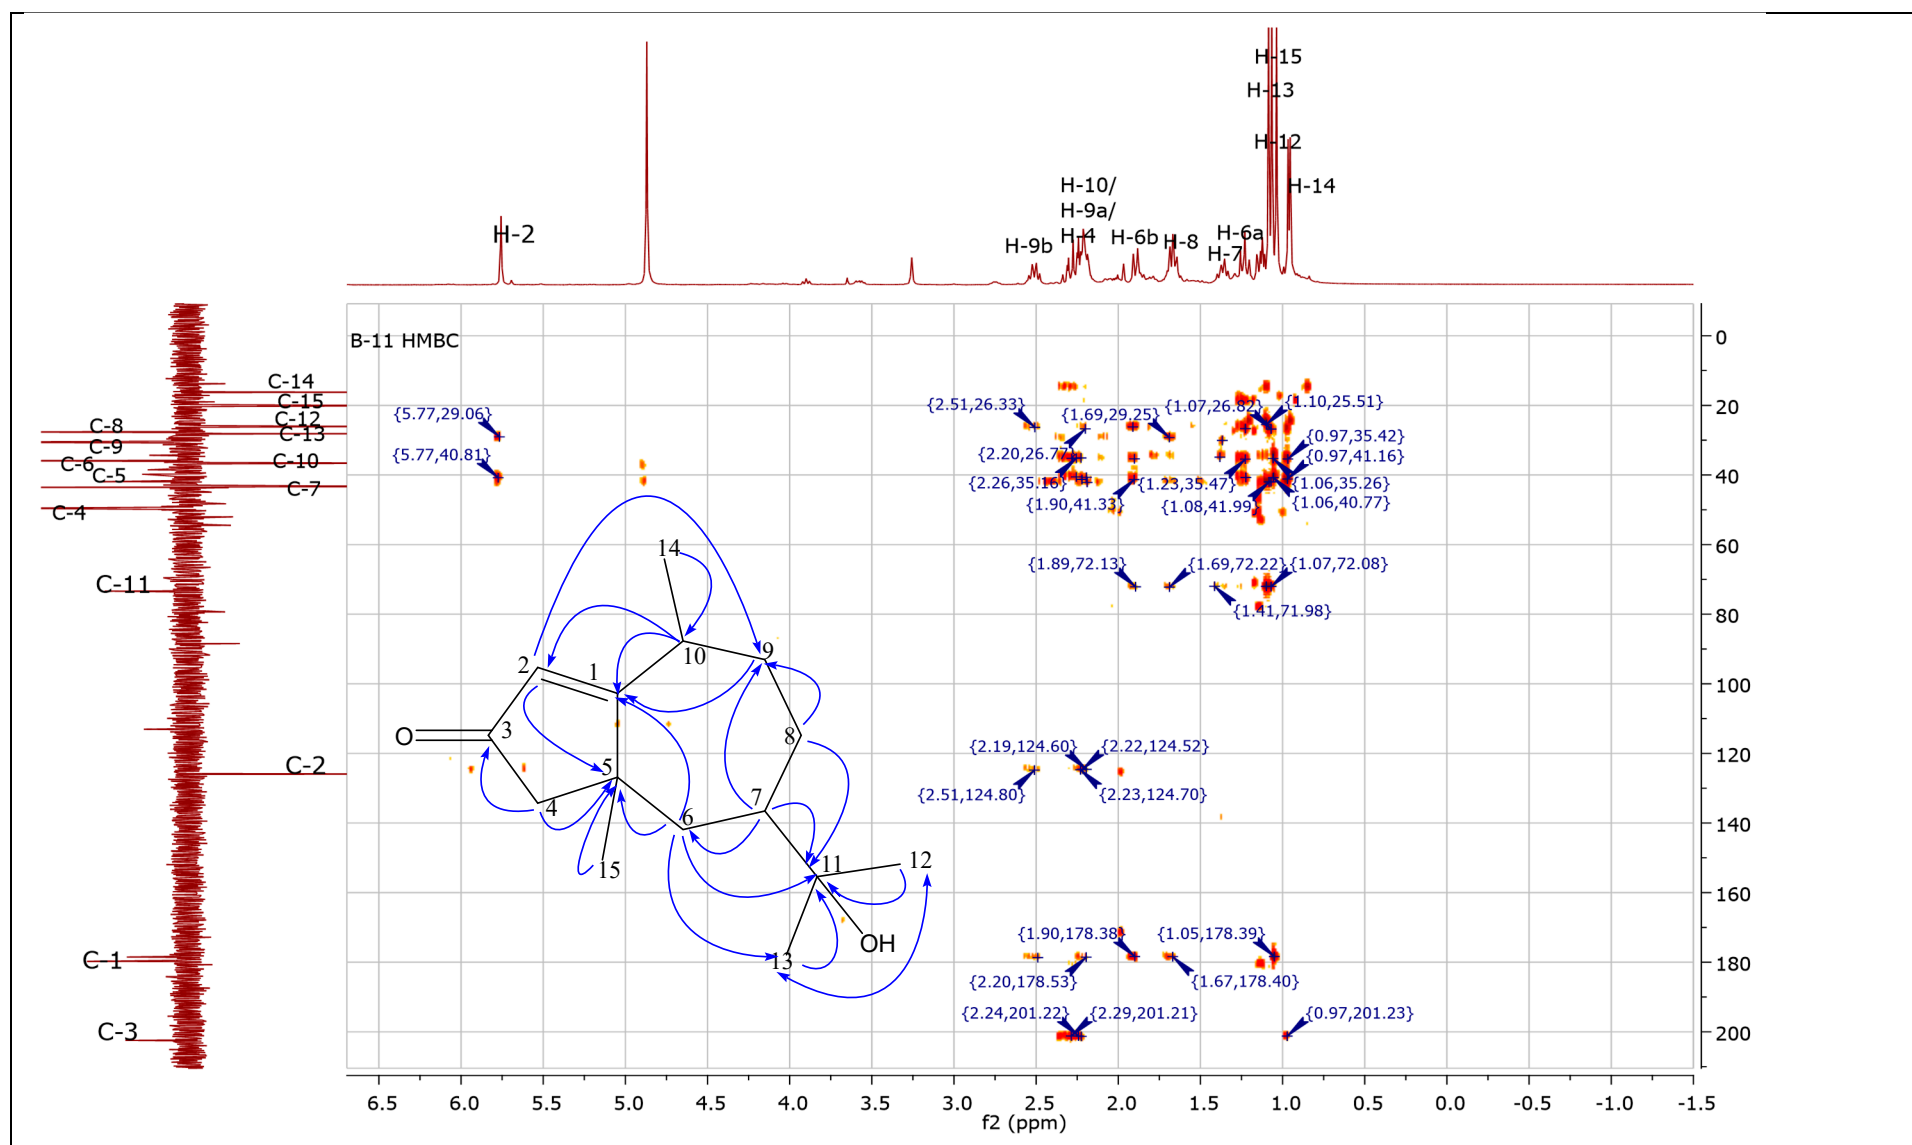

**Fig. S12.** HMBC spectrum (expansion; -1.5 – 6.5 ppm) of C3 in CD<sub>3</sub>OD.

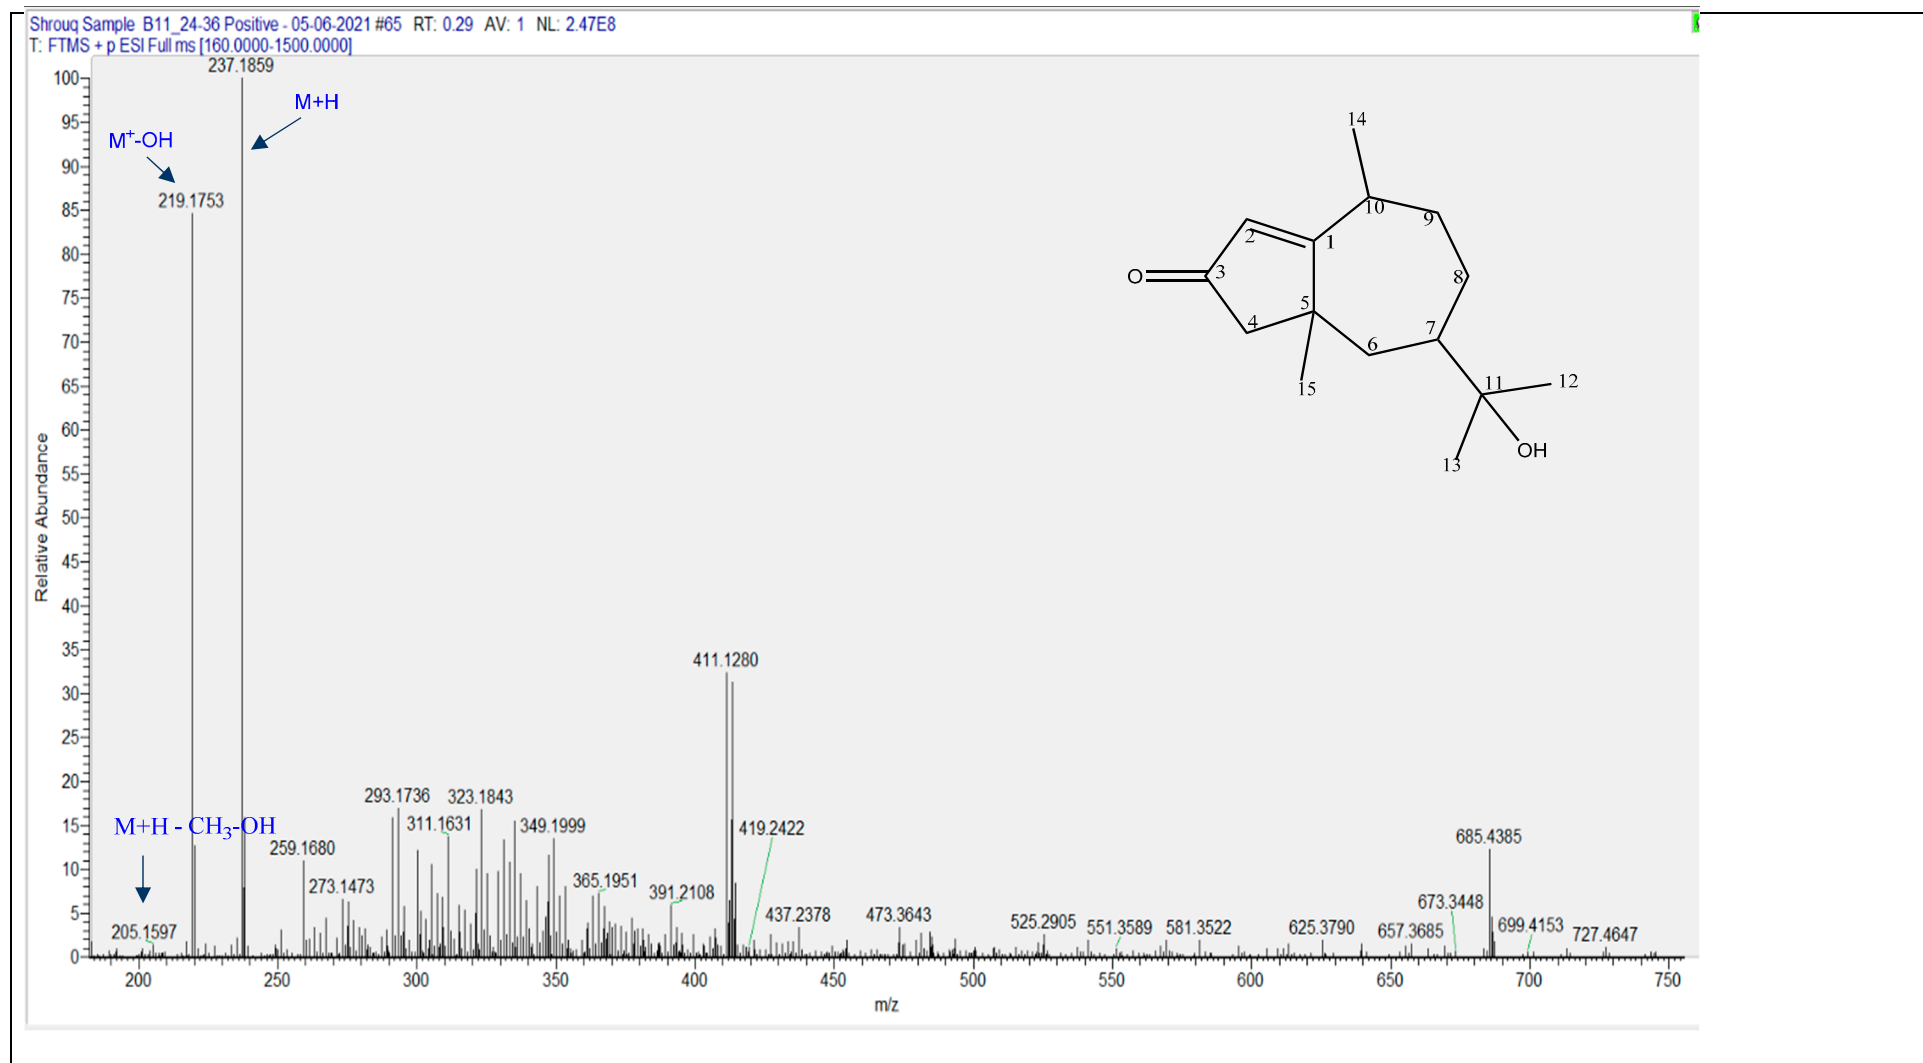

HR-ESI-MS (+ mode)

Fig. S13. HR-ESI-MS spectrum (positive mode) of C3.

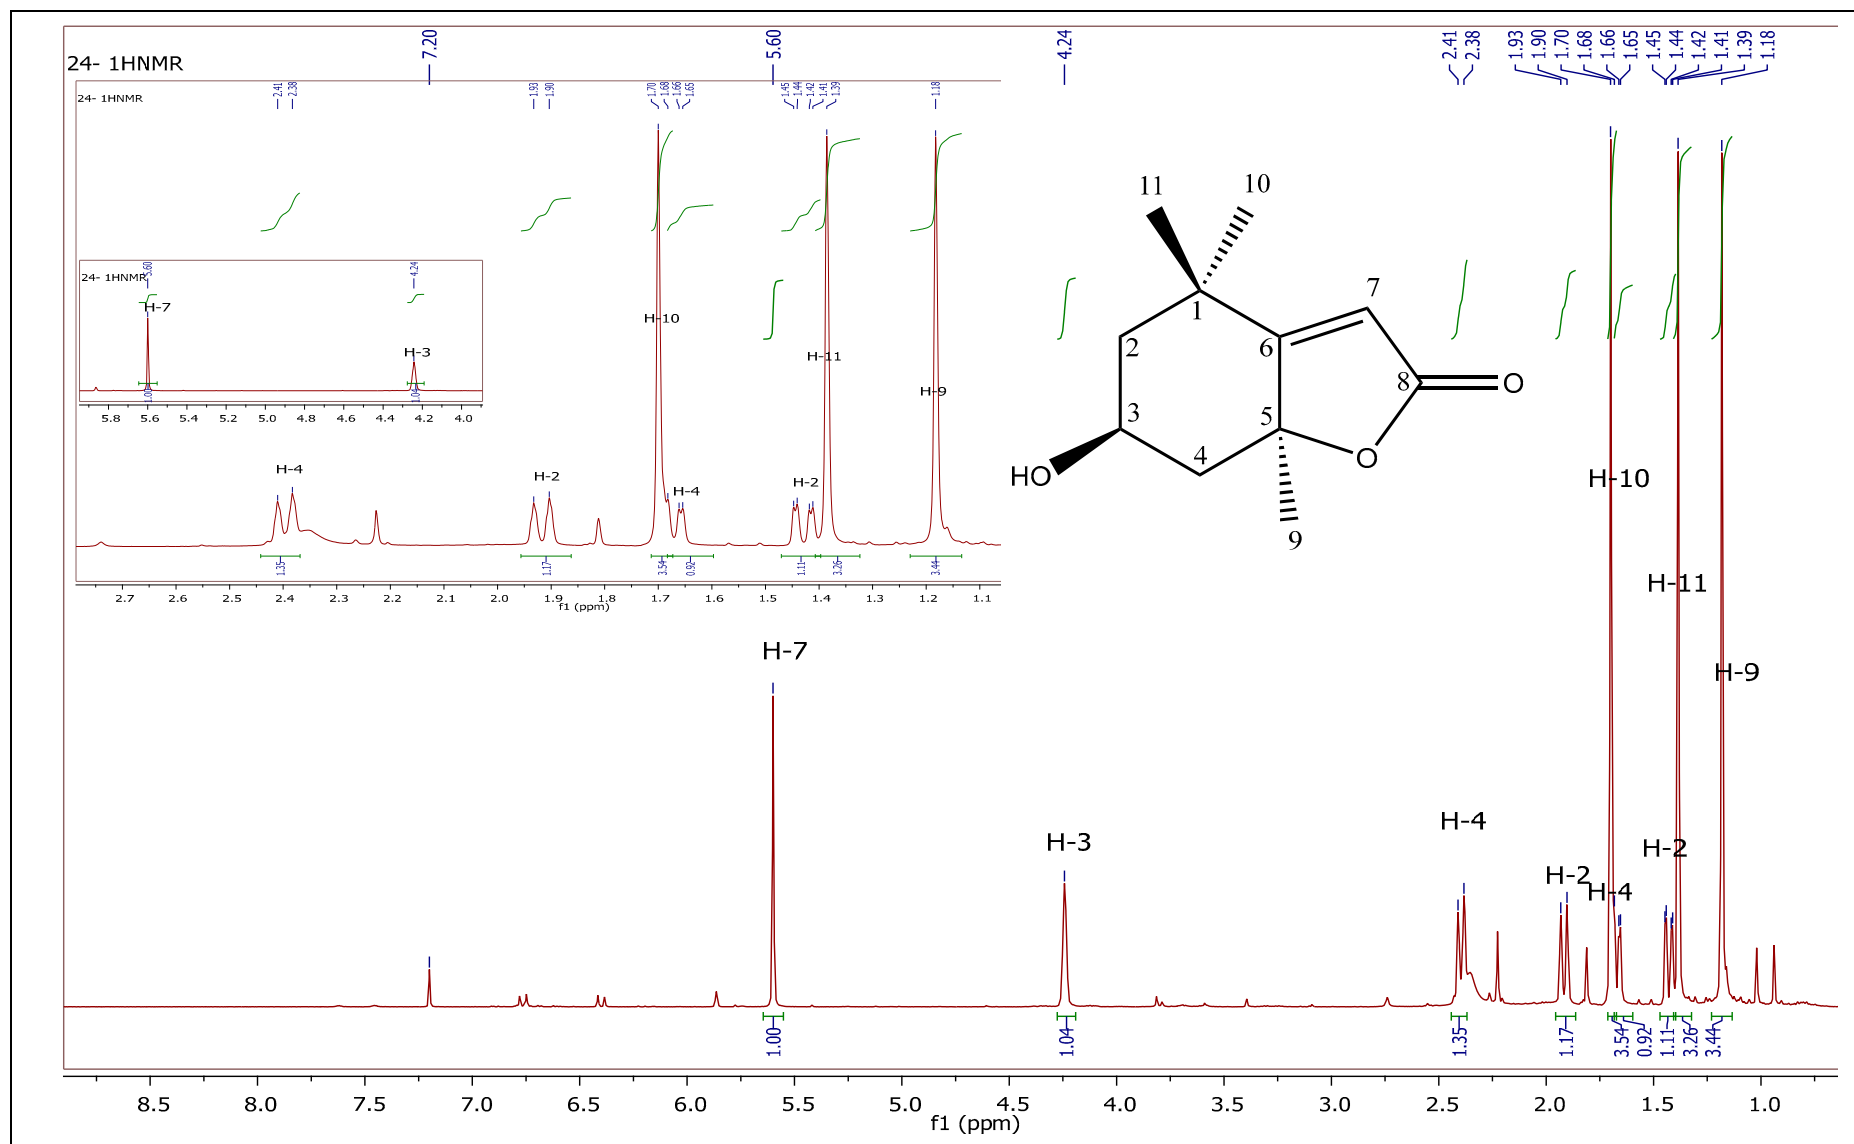

**Fig. S14.**  $^1\text{H}$ -NMR spectrum of **C4** in CDCl<sub>3</sub>.

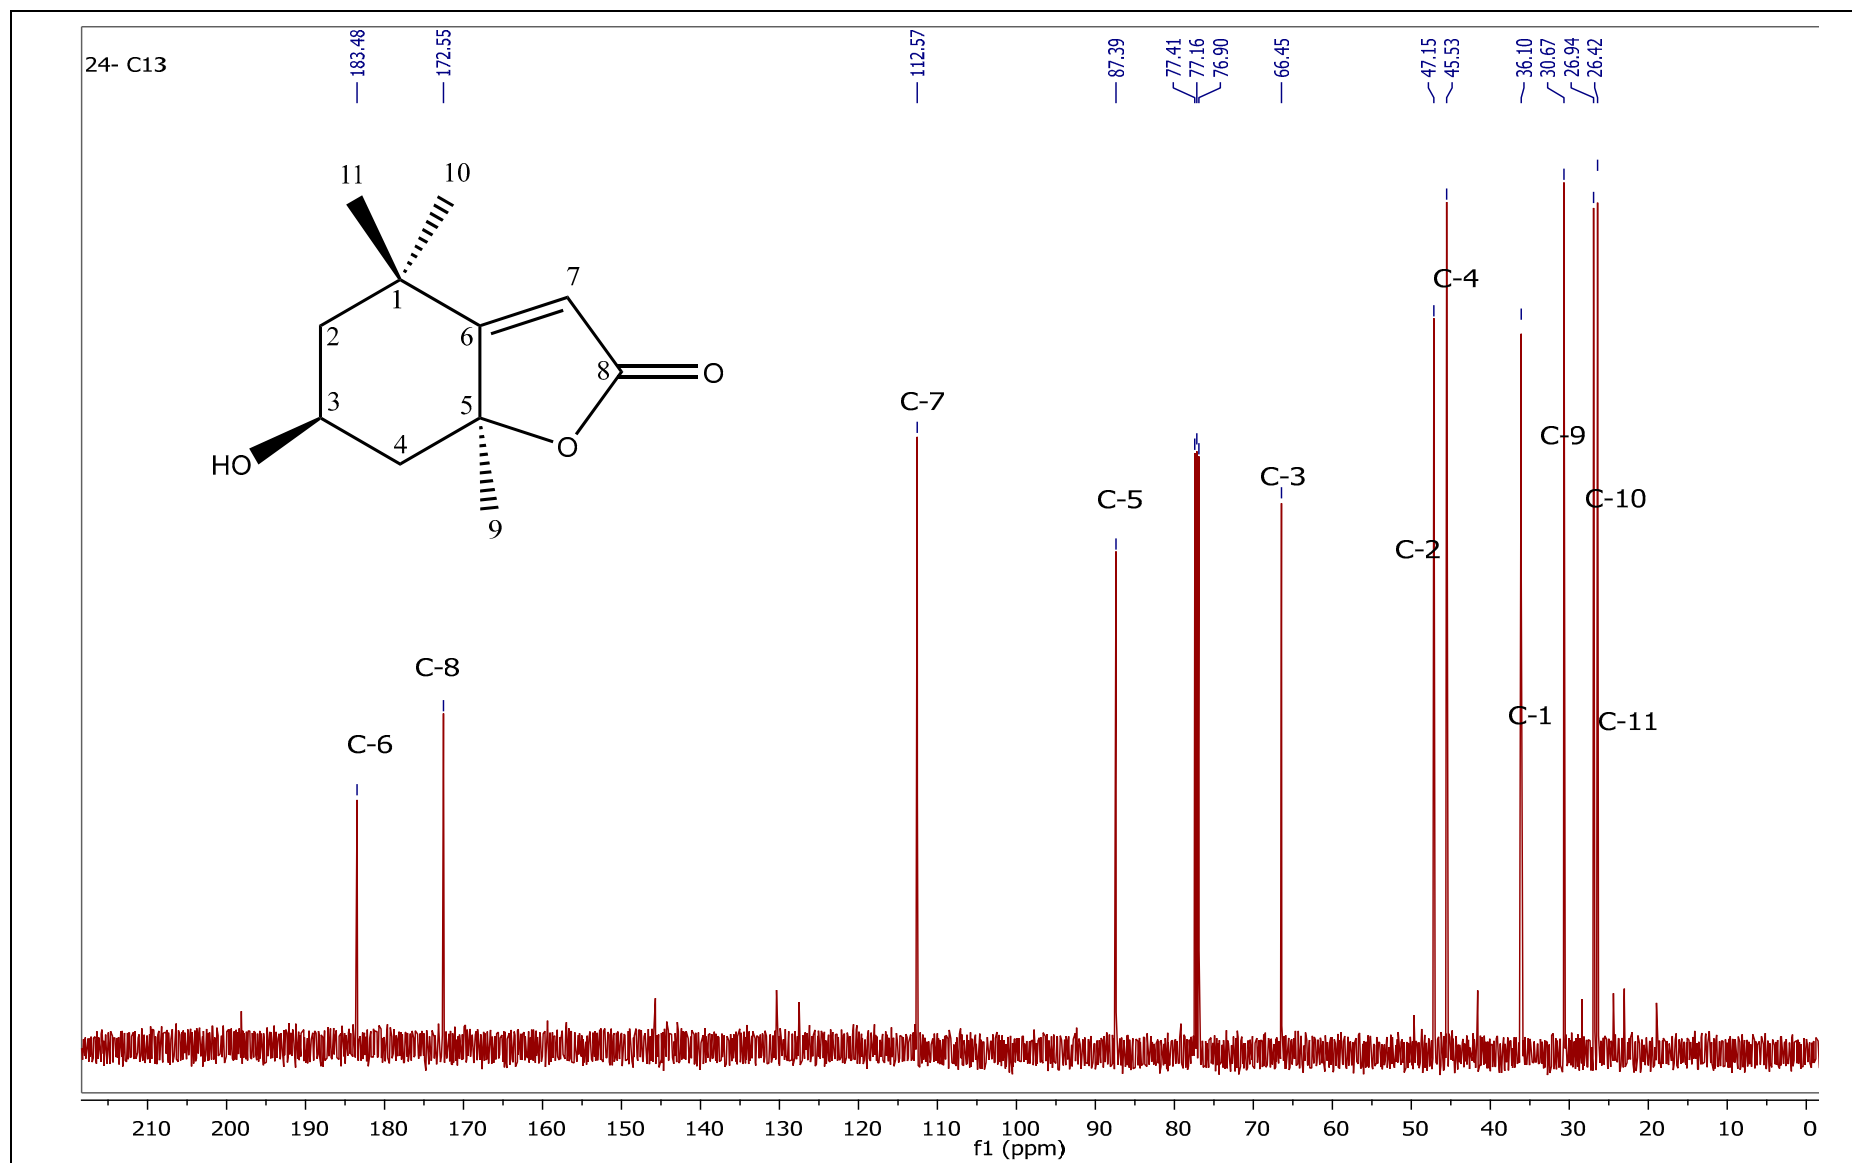

Fig. S15.  $^{13}\text{C}$ -NMR spectrum of C4 in  $\text{CDCl}_3$ .



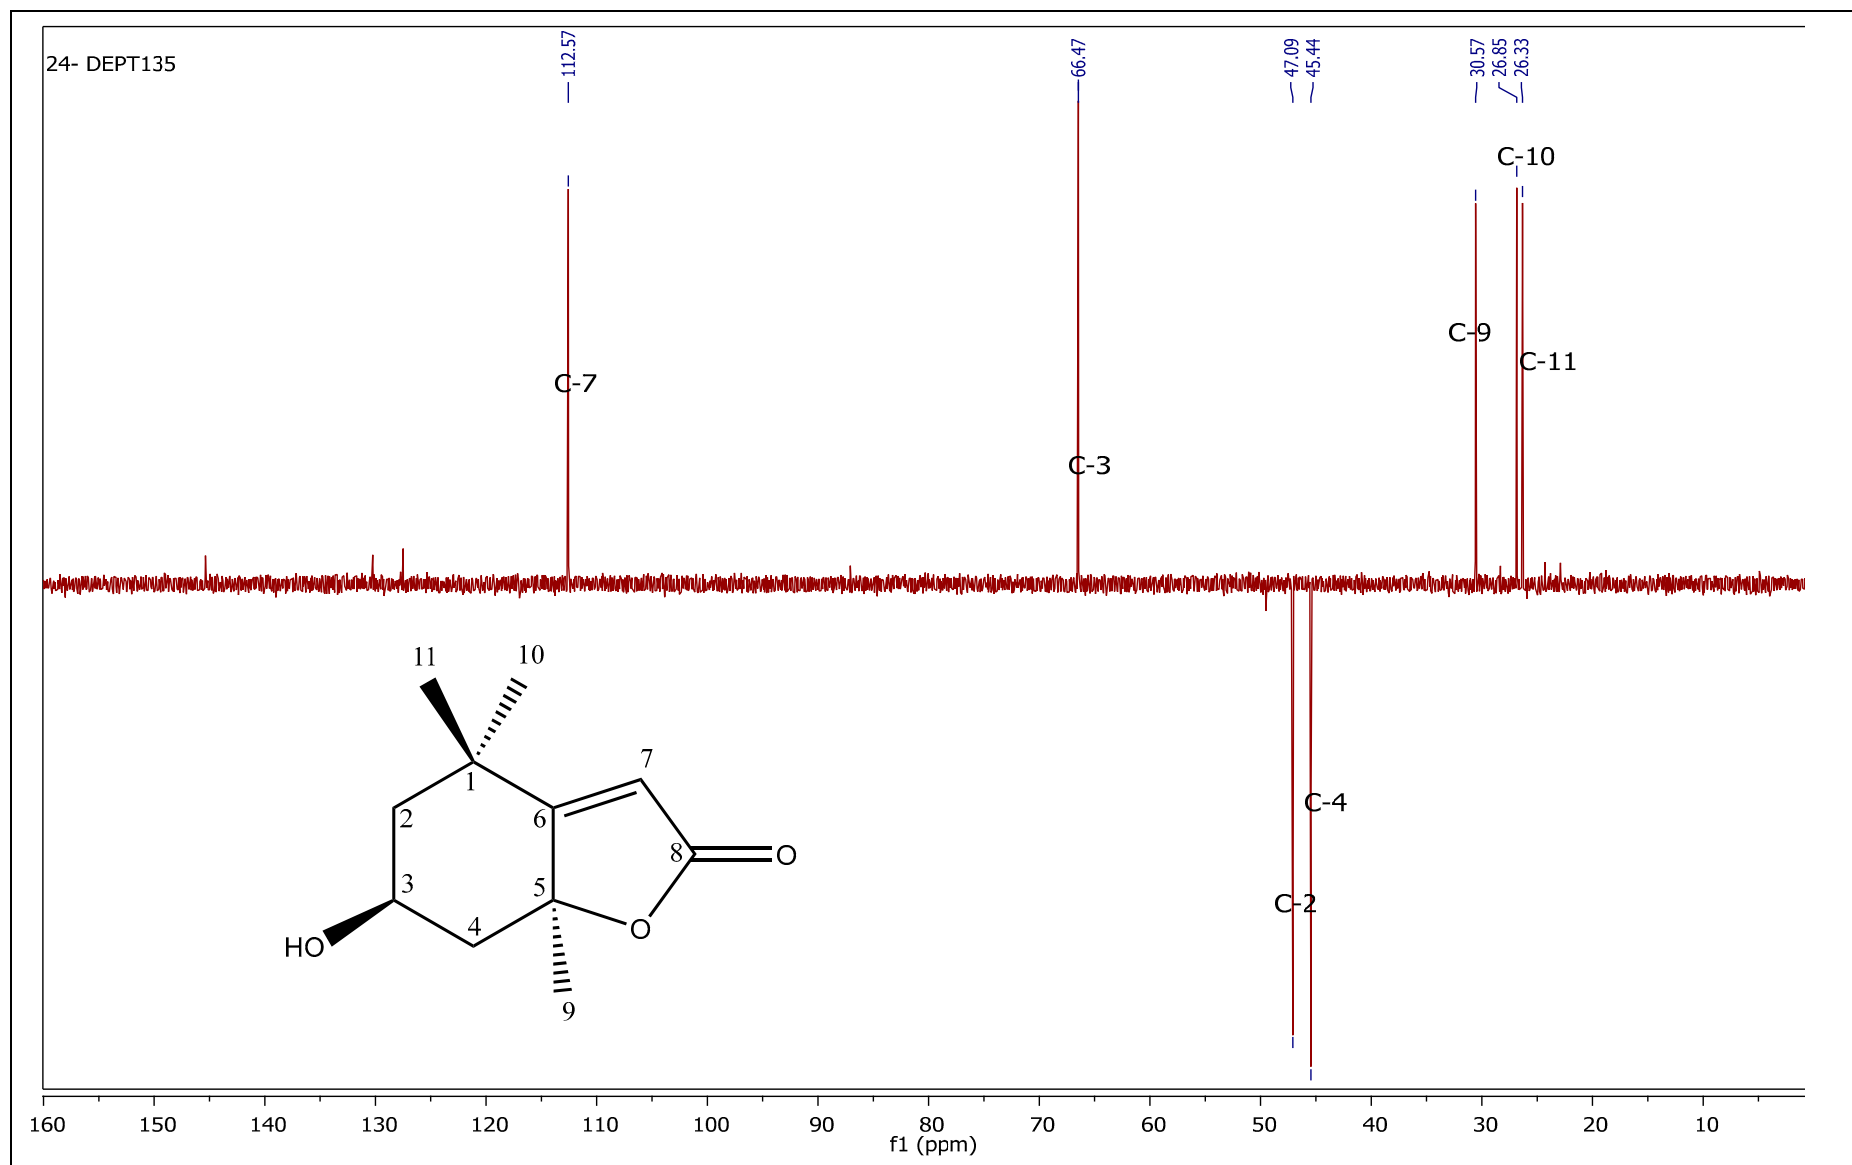

Fig. S16. DEPT spectrum of C4 in CDCl<sub>3</sub>.

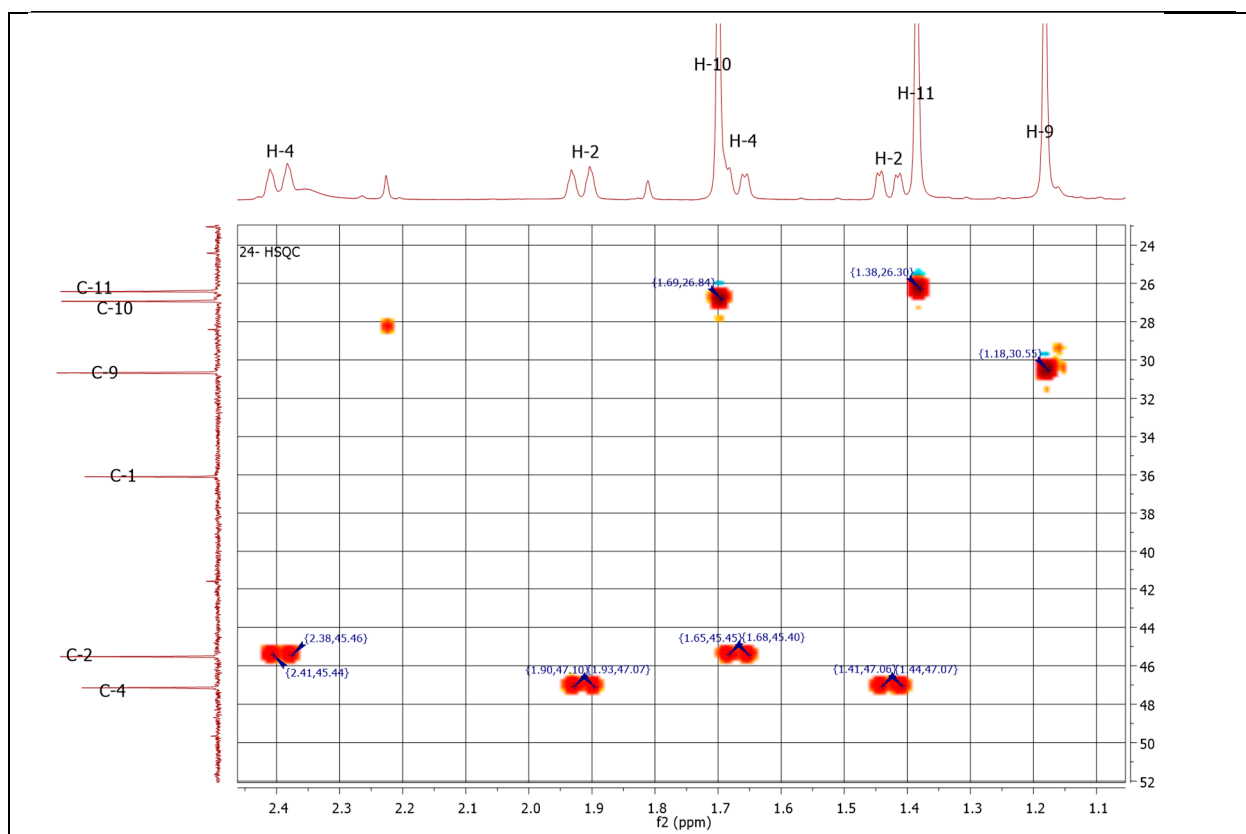

(Expansion; 1.1-2.4 ppm)

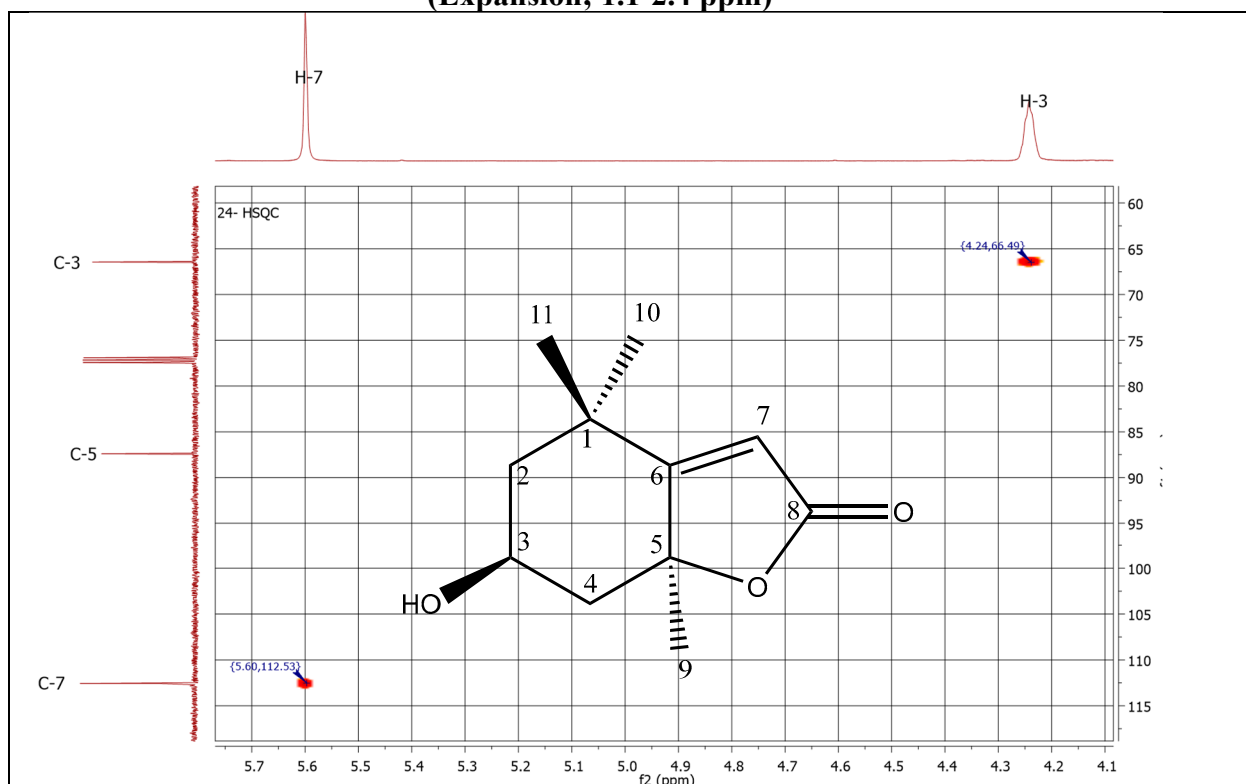

(Expansion; 4.1-5.7 ppm)

Fig. S17. HSQC spectrum (expansion; 1.1-2.4 ppm and 4.1-5.7 ppm) of C4 in CDCl<sub>3</sub>.

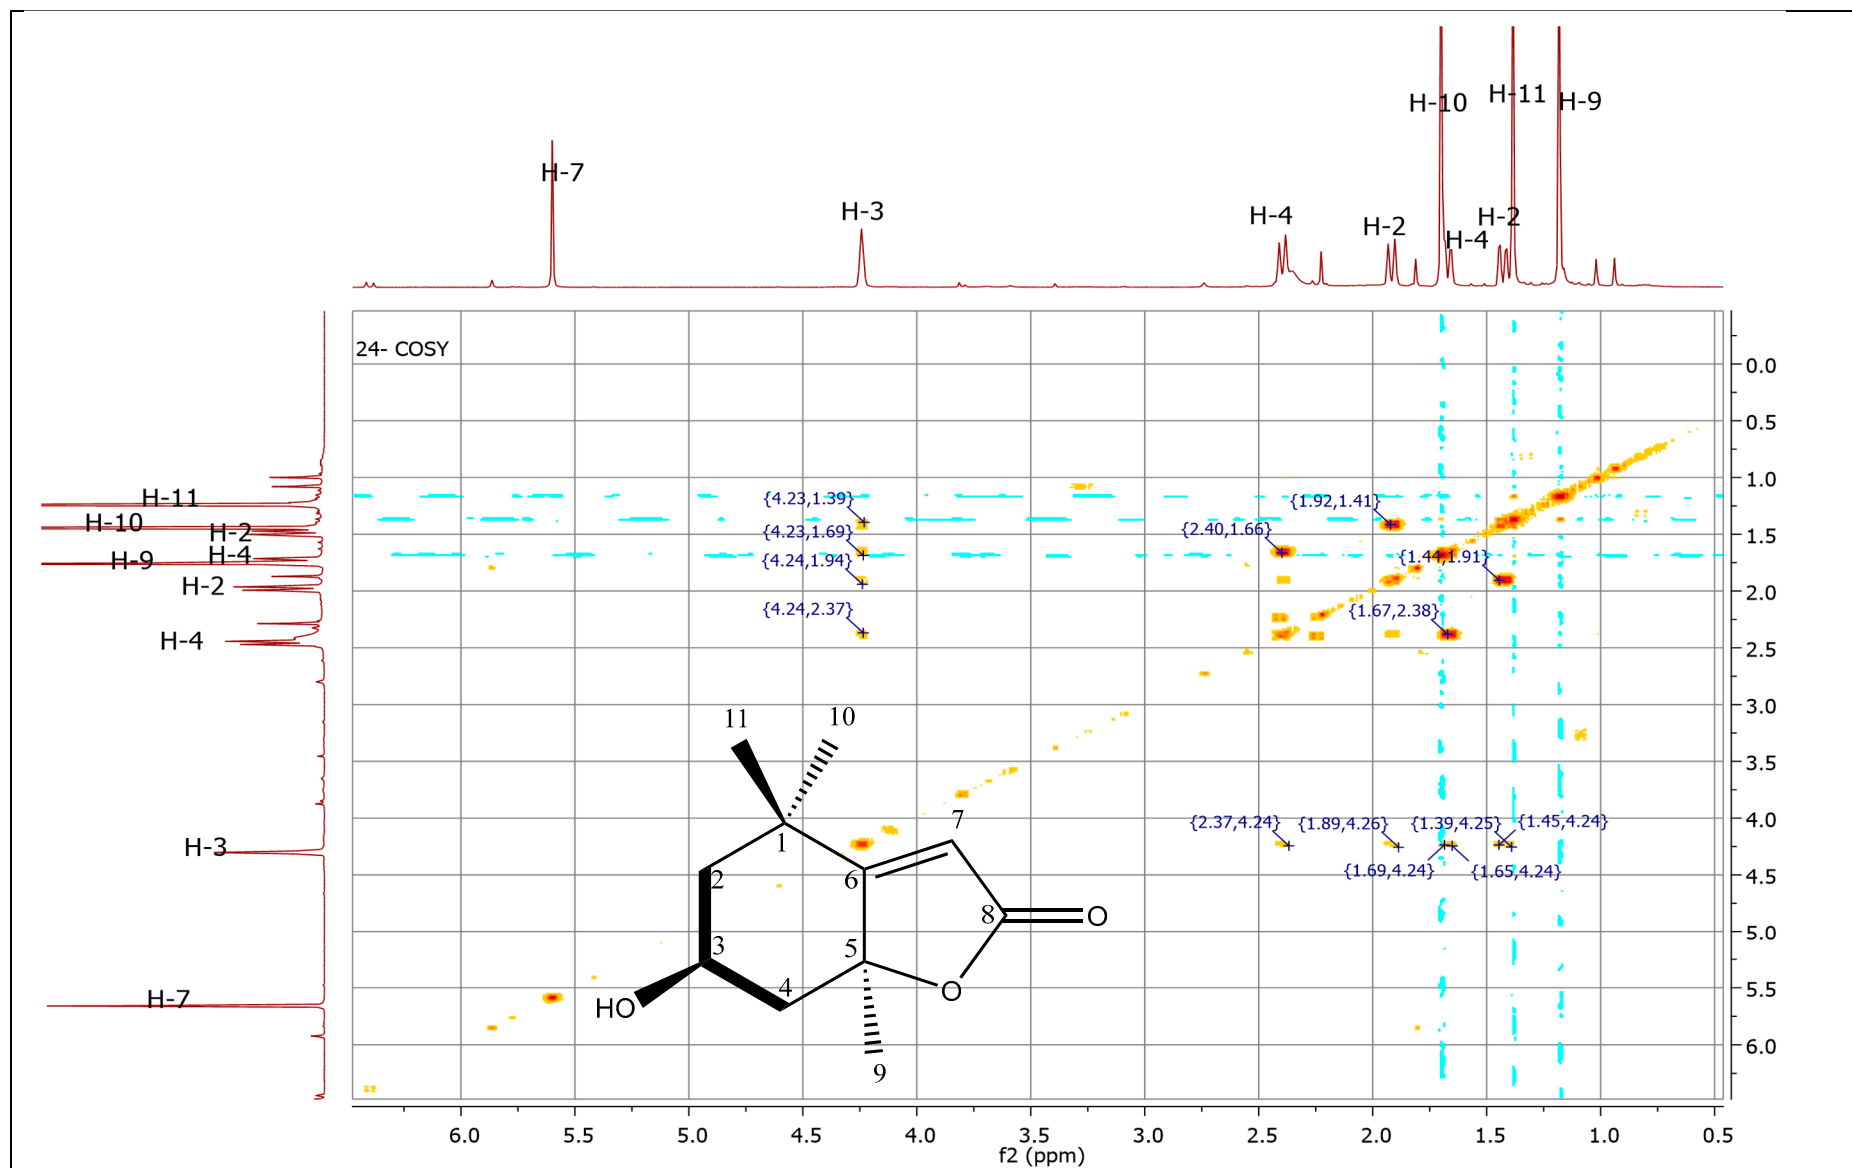

Fig. S18. COSY spectrum (expansion; 0.5-6.5 ppm) of C4 in CDCl<sub>3</sub>.

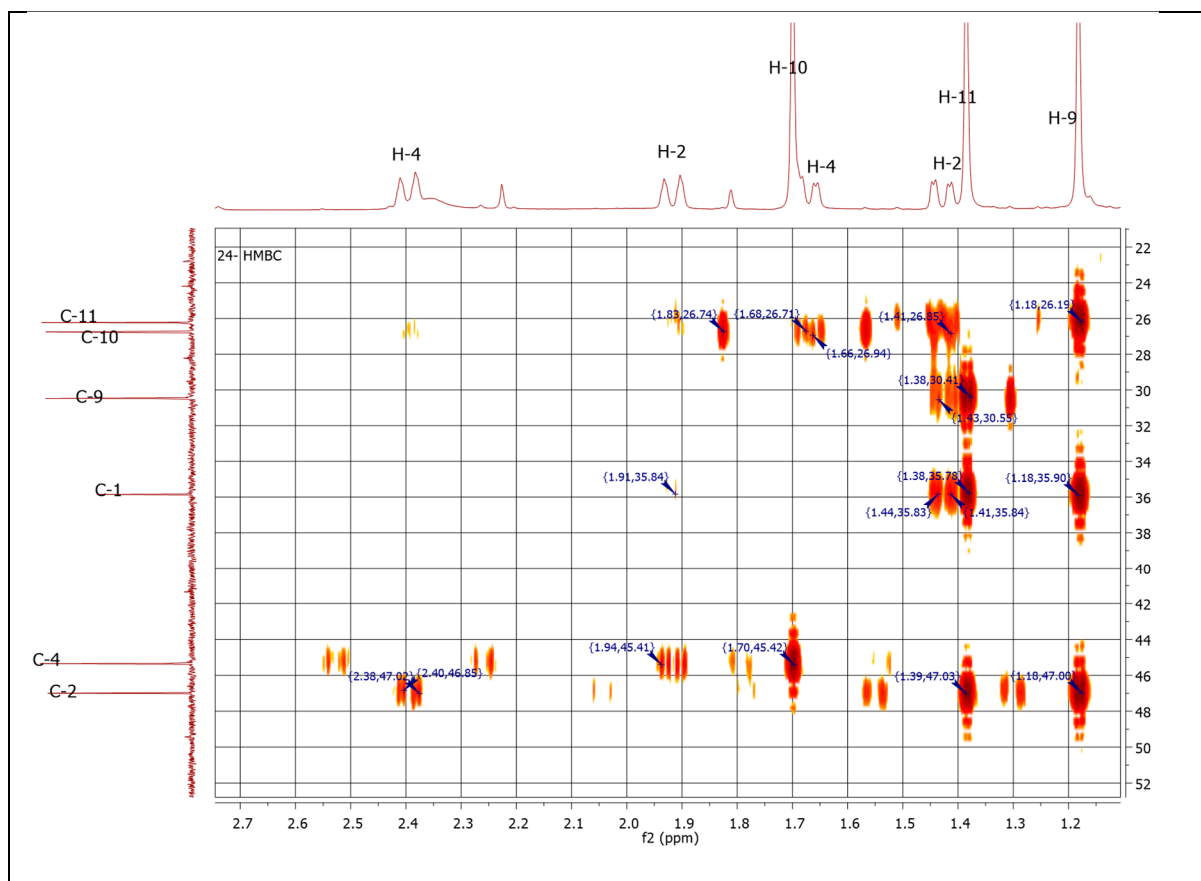

**A. Expansion; 1.0-2.7 ppm**

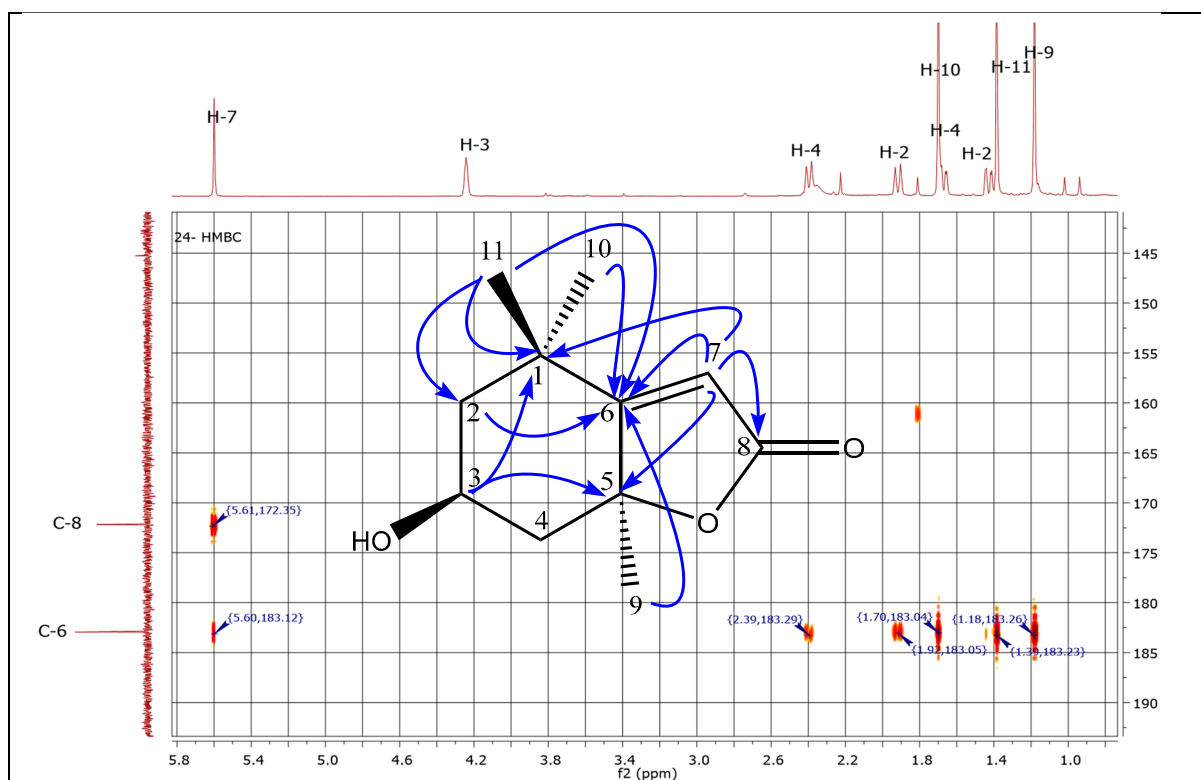

**B. Expansion; 1.0-5.8 ppm**

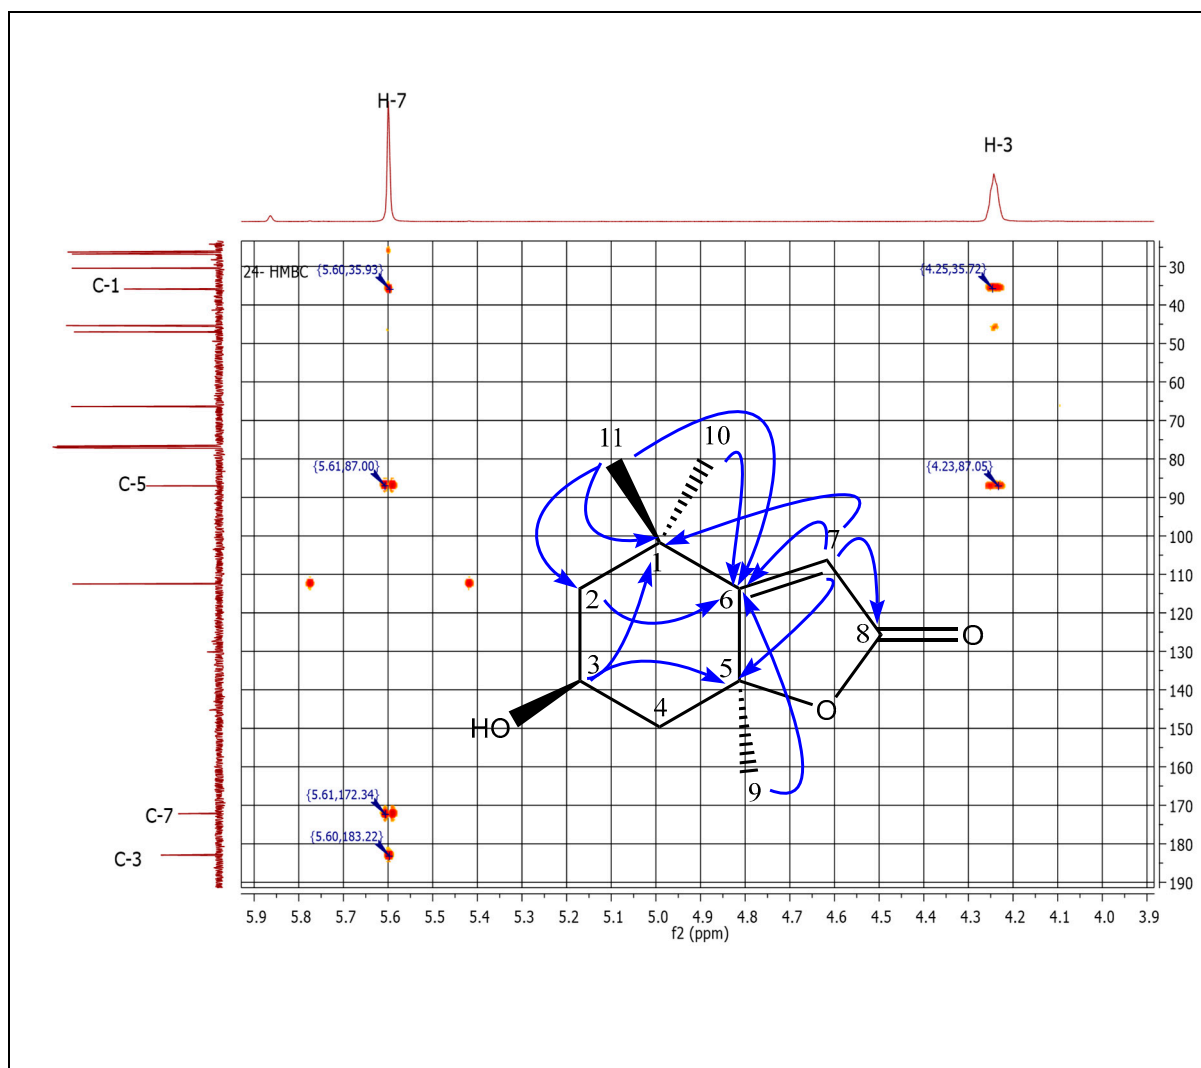

### C. Expansion; 3.9-5.9 ppm

**Fig. S19.** HMBC spectrum (expansion; A. 1.0-2.7, B. 1.0-5.8, and C. 3.9-5.9 ppm) of **C4** in  $\text{CDCl}_3$ .

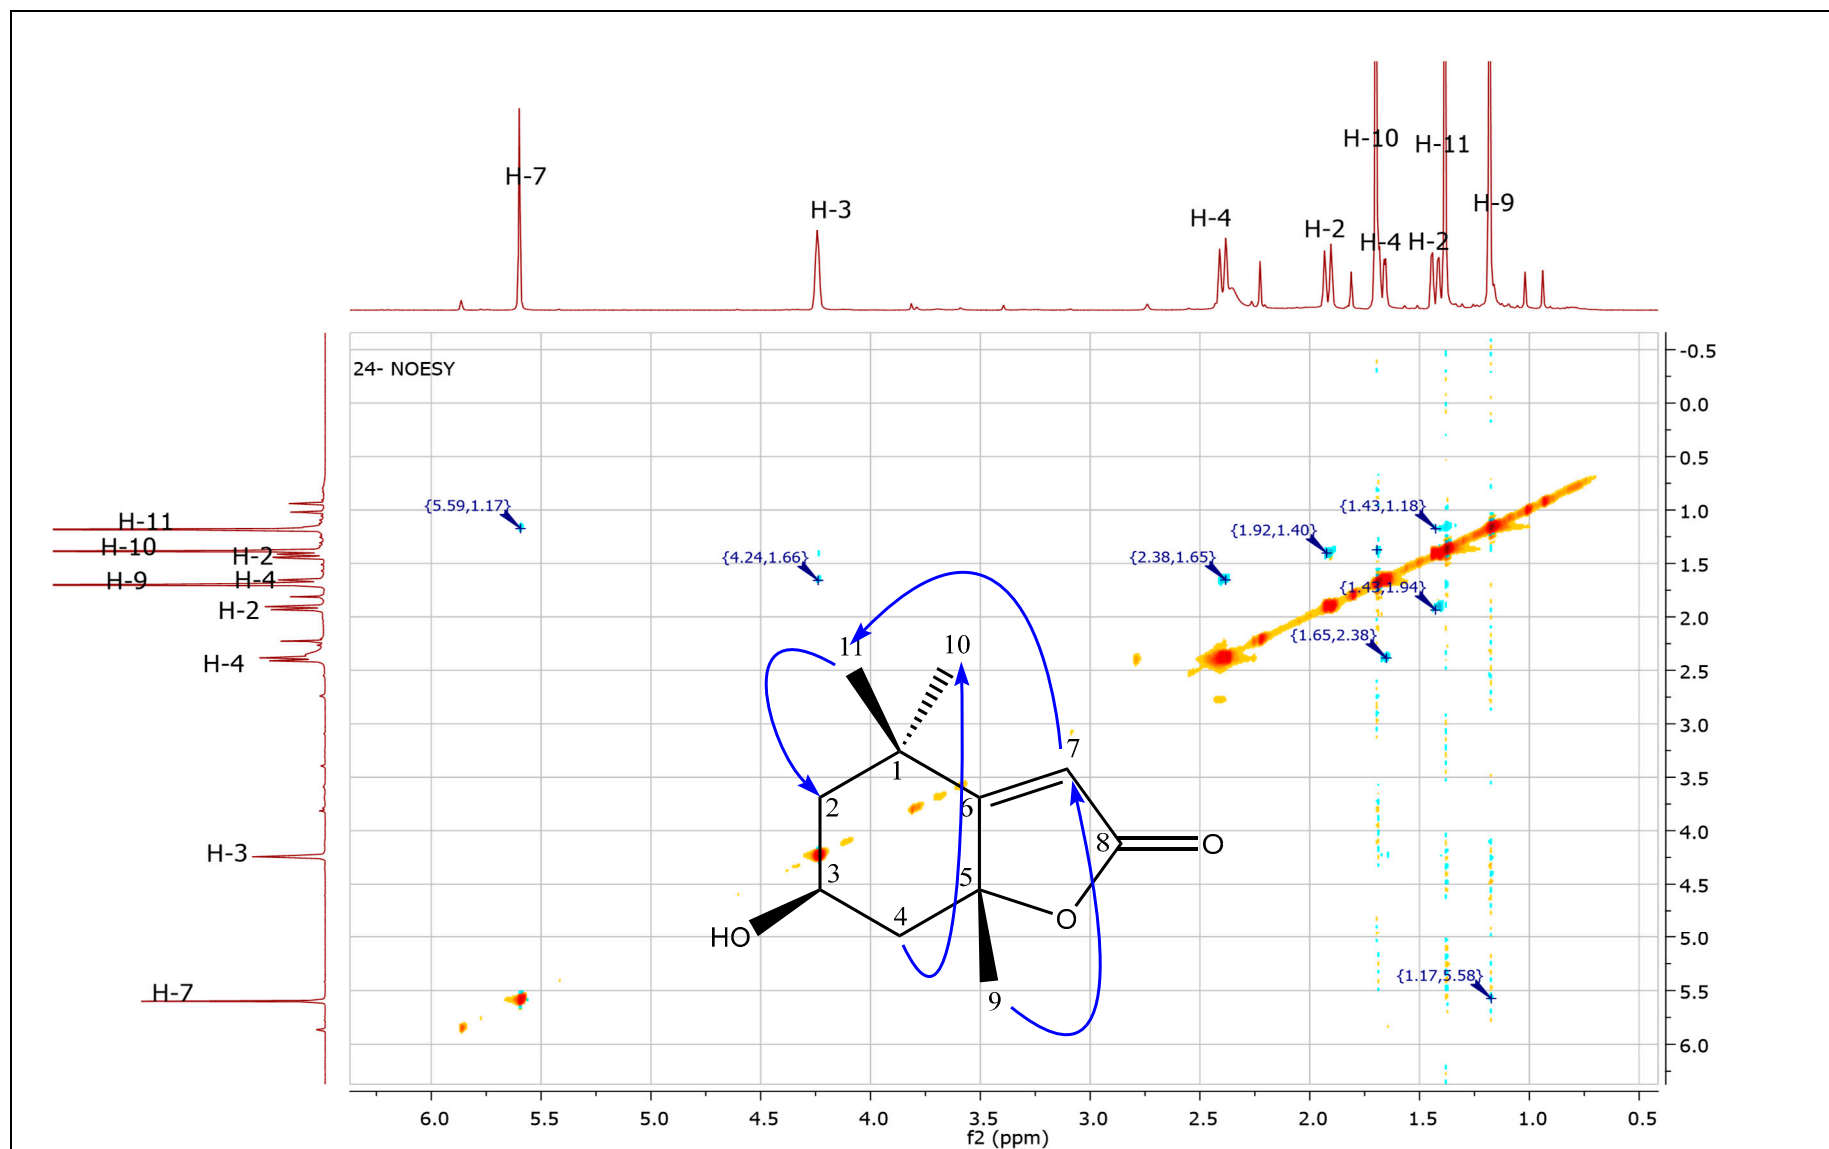

**Fig. S20.** NOESY spectrum (expansion; 0.5-6.5 ppm) of C4 in  $\text{CDCl}_3$ .

Shrouq Sample 24 Positive\_01-03-2021 #43 RT: 0.19 AV: 1 NL: 4.06E8  
T: FTMS + p ESI Full ms [160.0000-1500.0000]

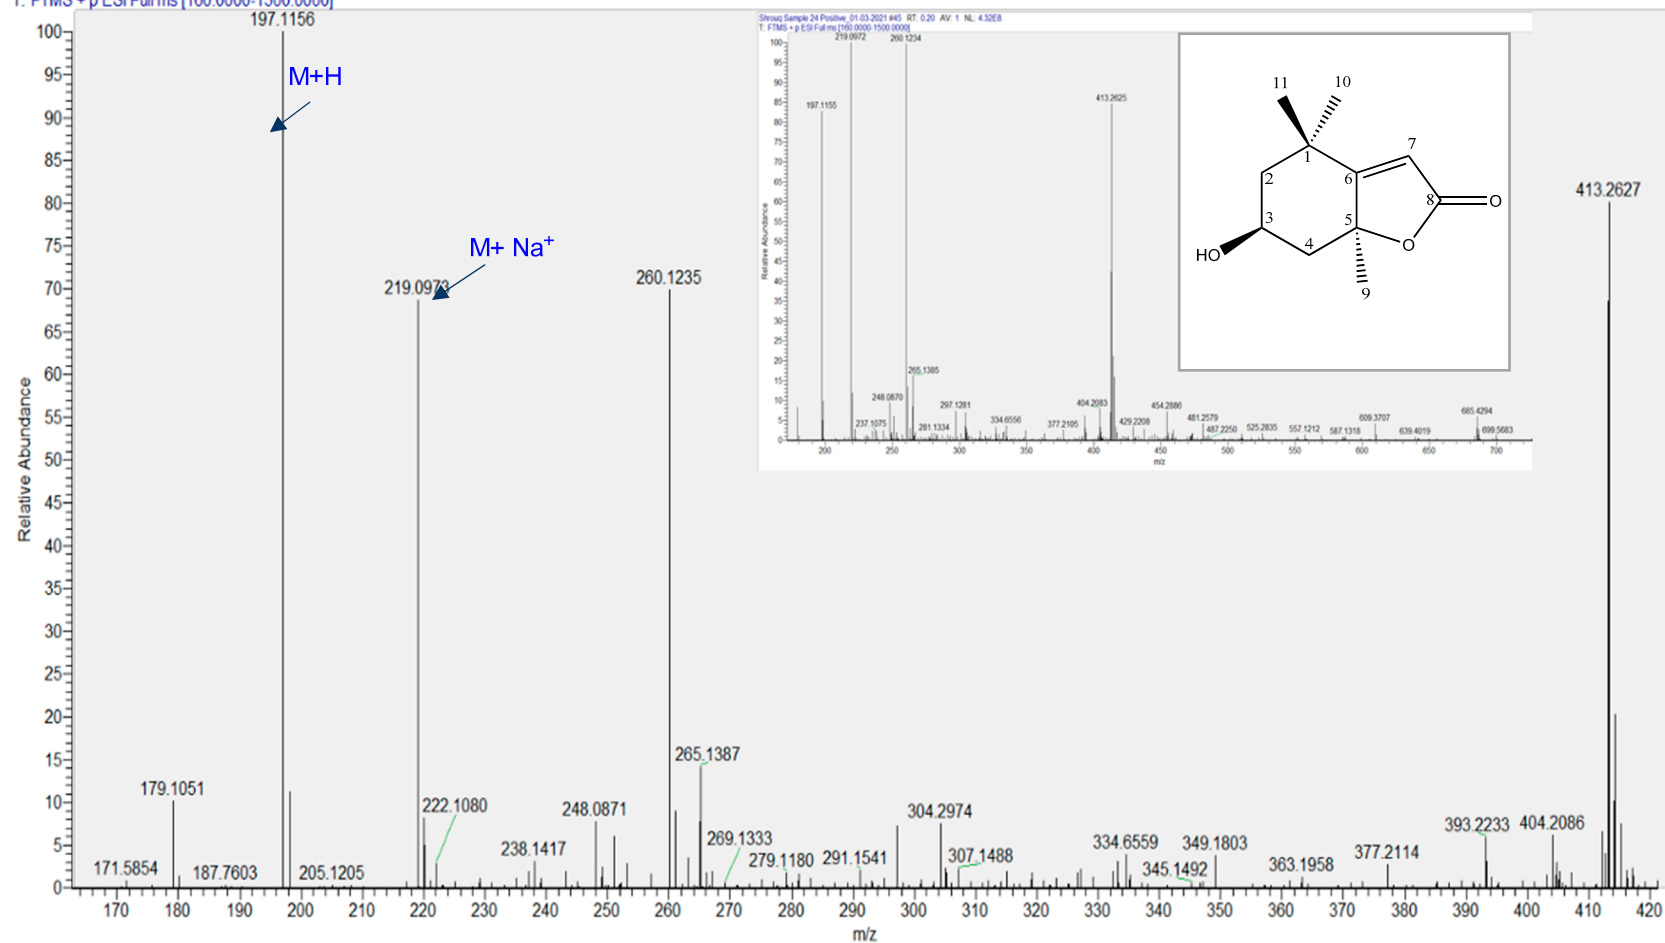

**Fig. S21.** HR-ESI-MS (+ mode) spectrum (expansion; 170-420  $m/z$ ) of C4 in  $CDCl_3$ .

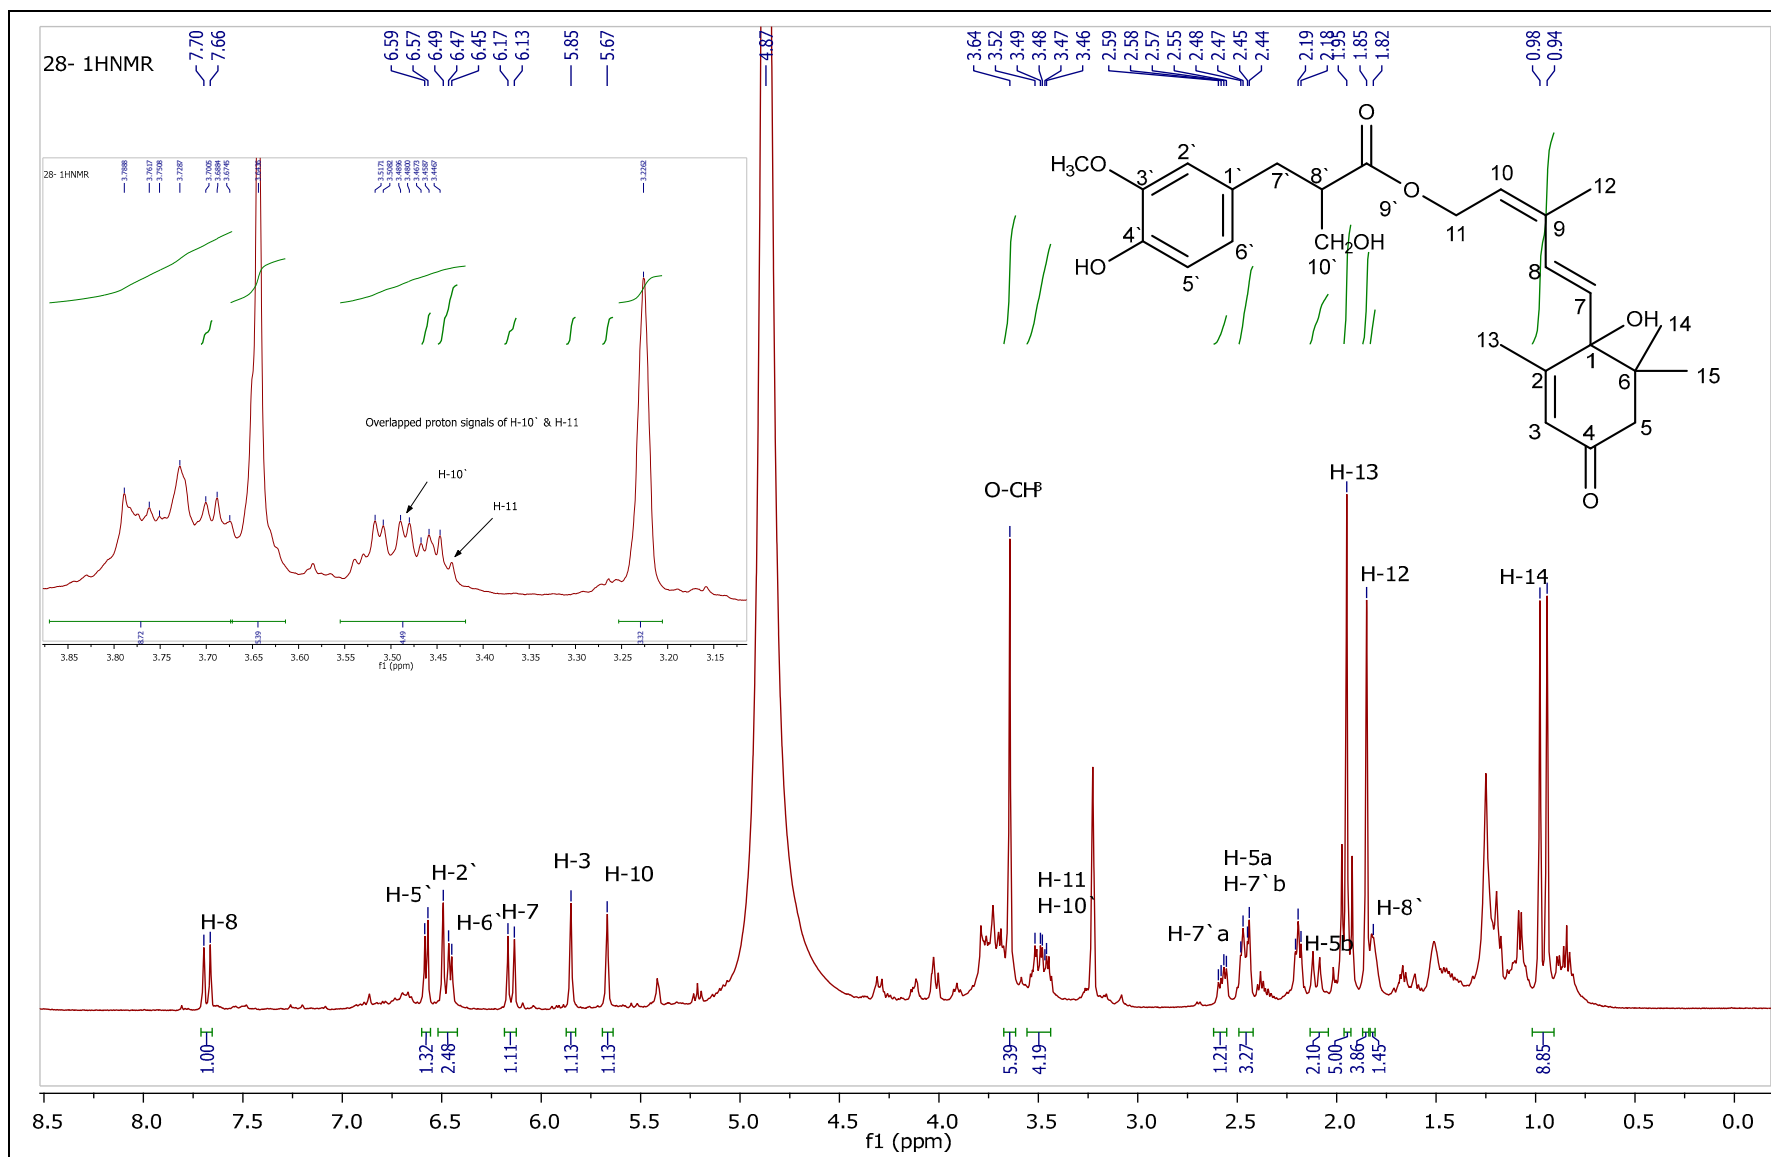

Fig. S22. <sup>1</sup>H-NMR spectrum of C5 in CD<sub>3</sub>OD.



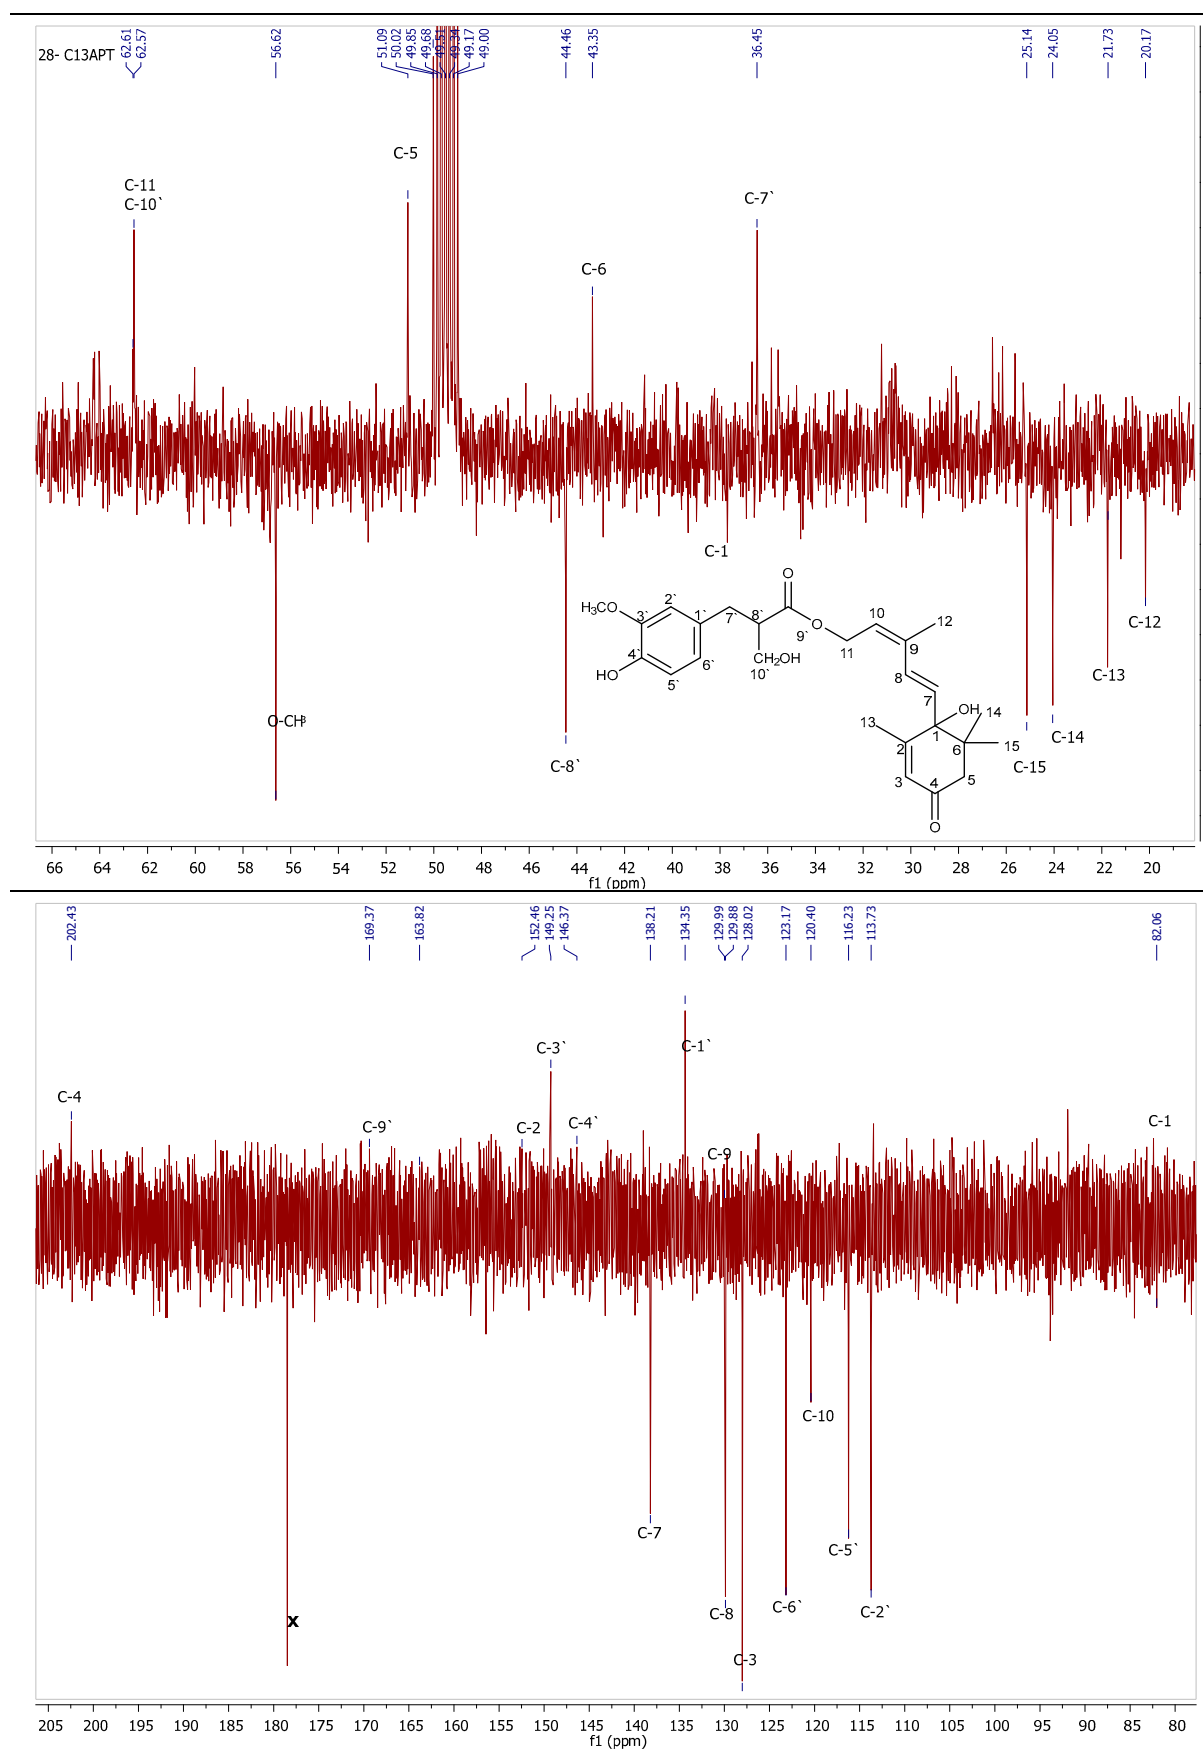

**Fig. S23.** APT spectrum (expansion; 18-66 and 80-205 ppm) of **C5** in CD<sub>3</sub>OD.

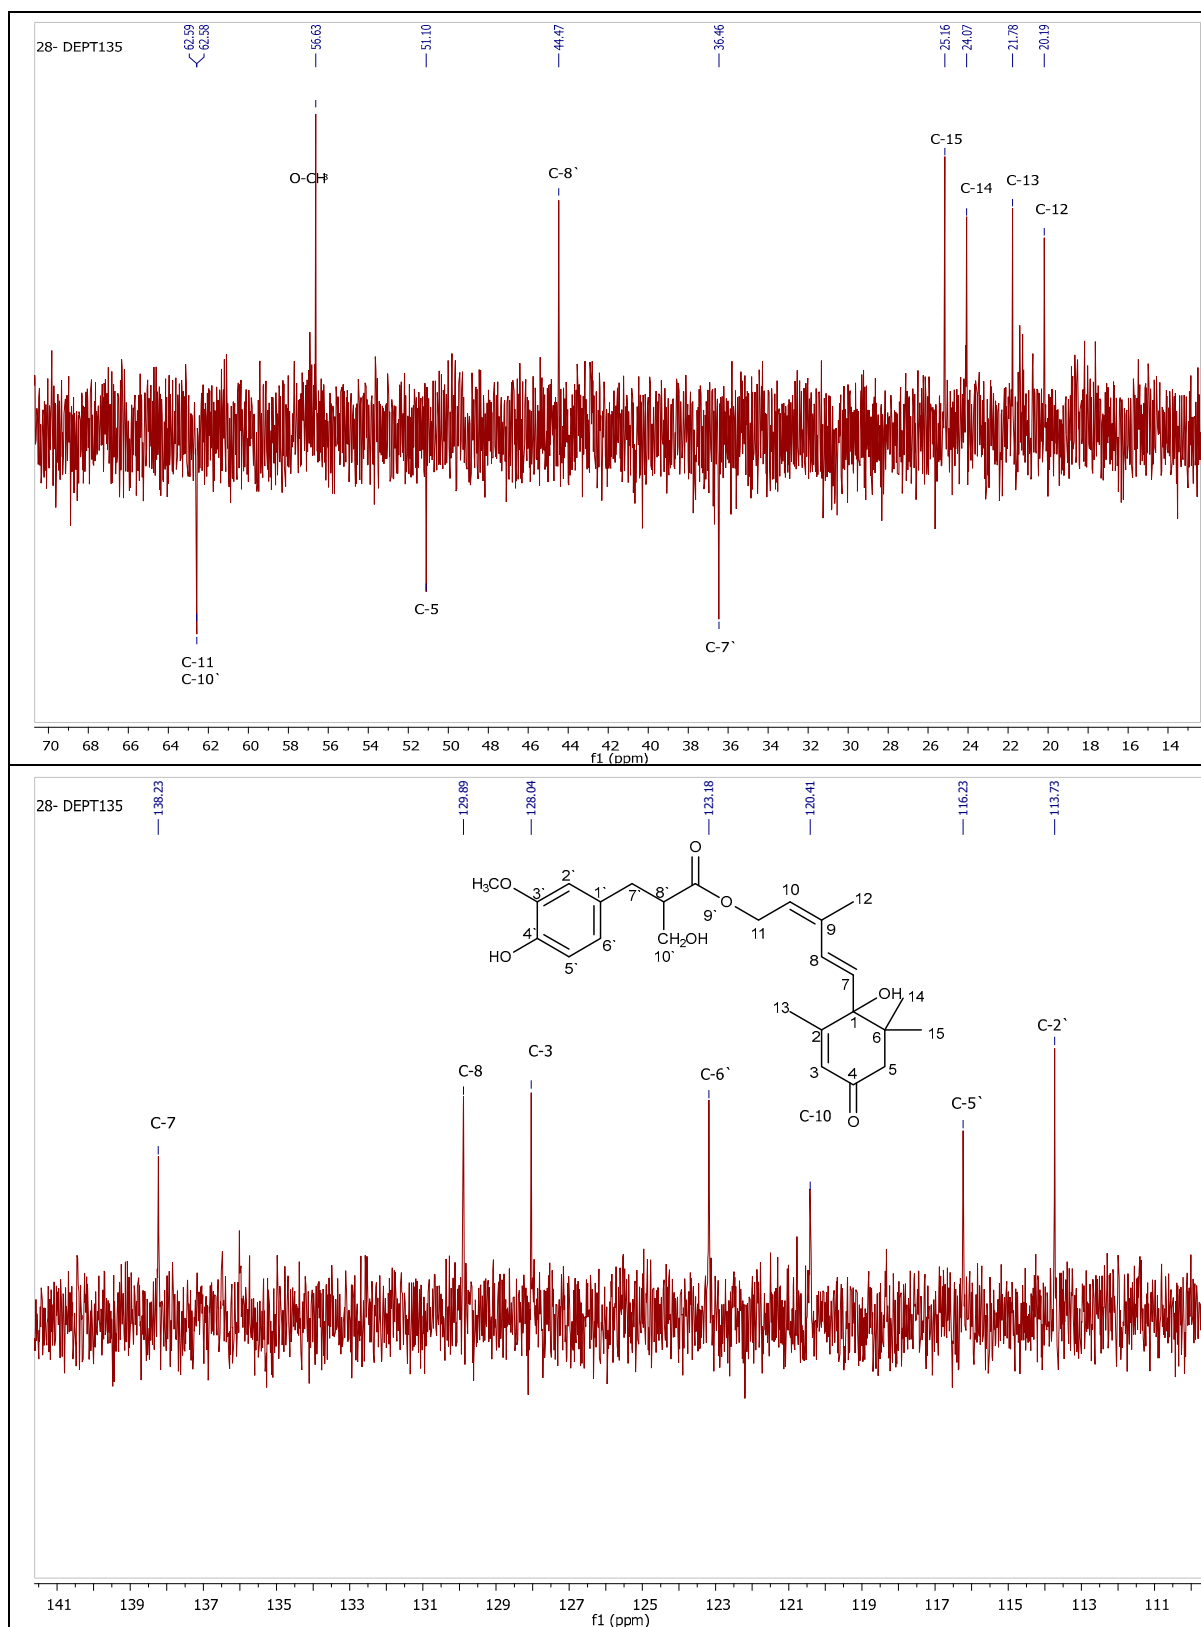

**Fig. S24.** DEPT spectrum (expansion; 12-70 and 111-141 ppm) of **C5** in CD<sub>3</sub>OD.

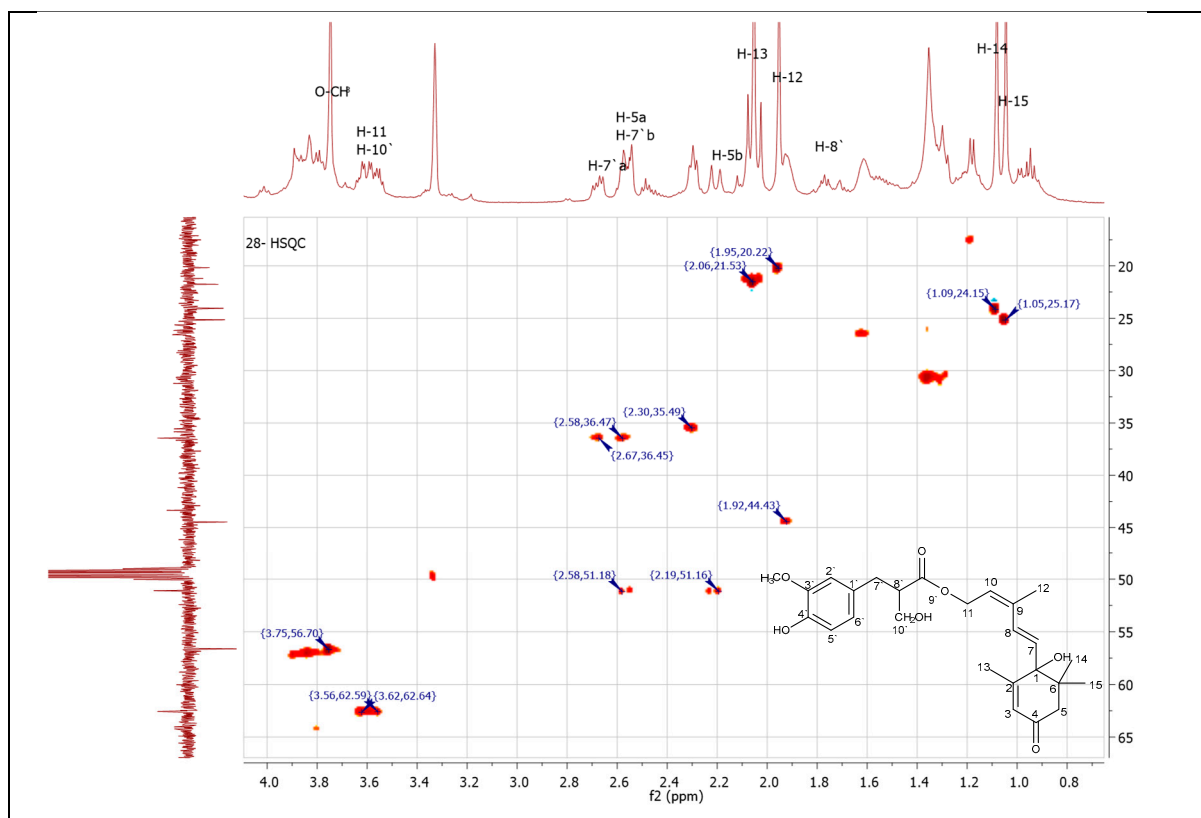

**Expansion; 0.8-4.0 ppm**

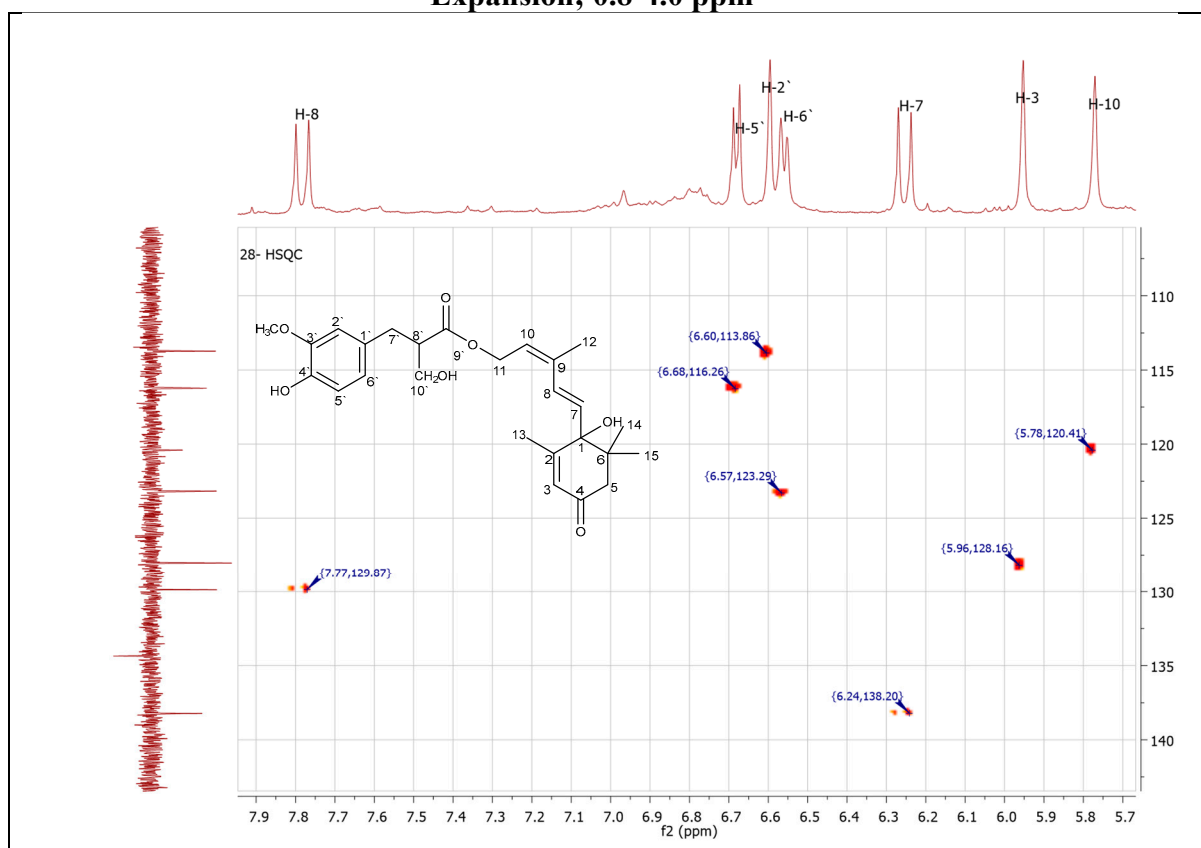

**Expansion; 5.7-7.9 ppm**

**Fig. S25.** HSQC spectrum (expansion; 0.8-4.0 and 5.7-7.9 ppm) of **C5** in CD<sub>3</sub>OD.

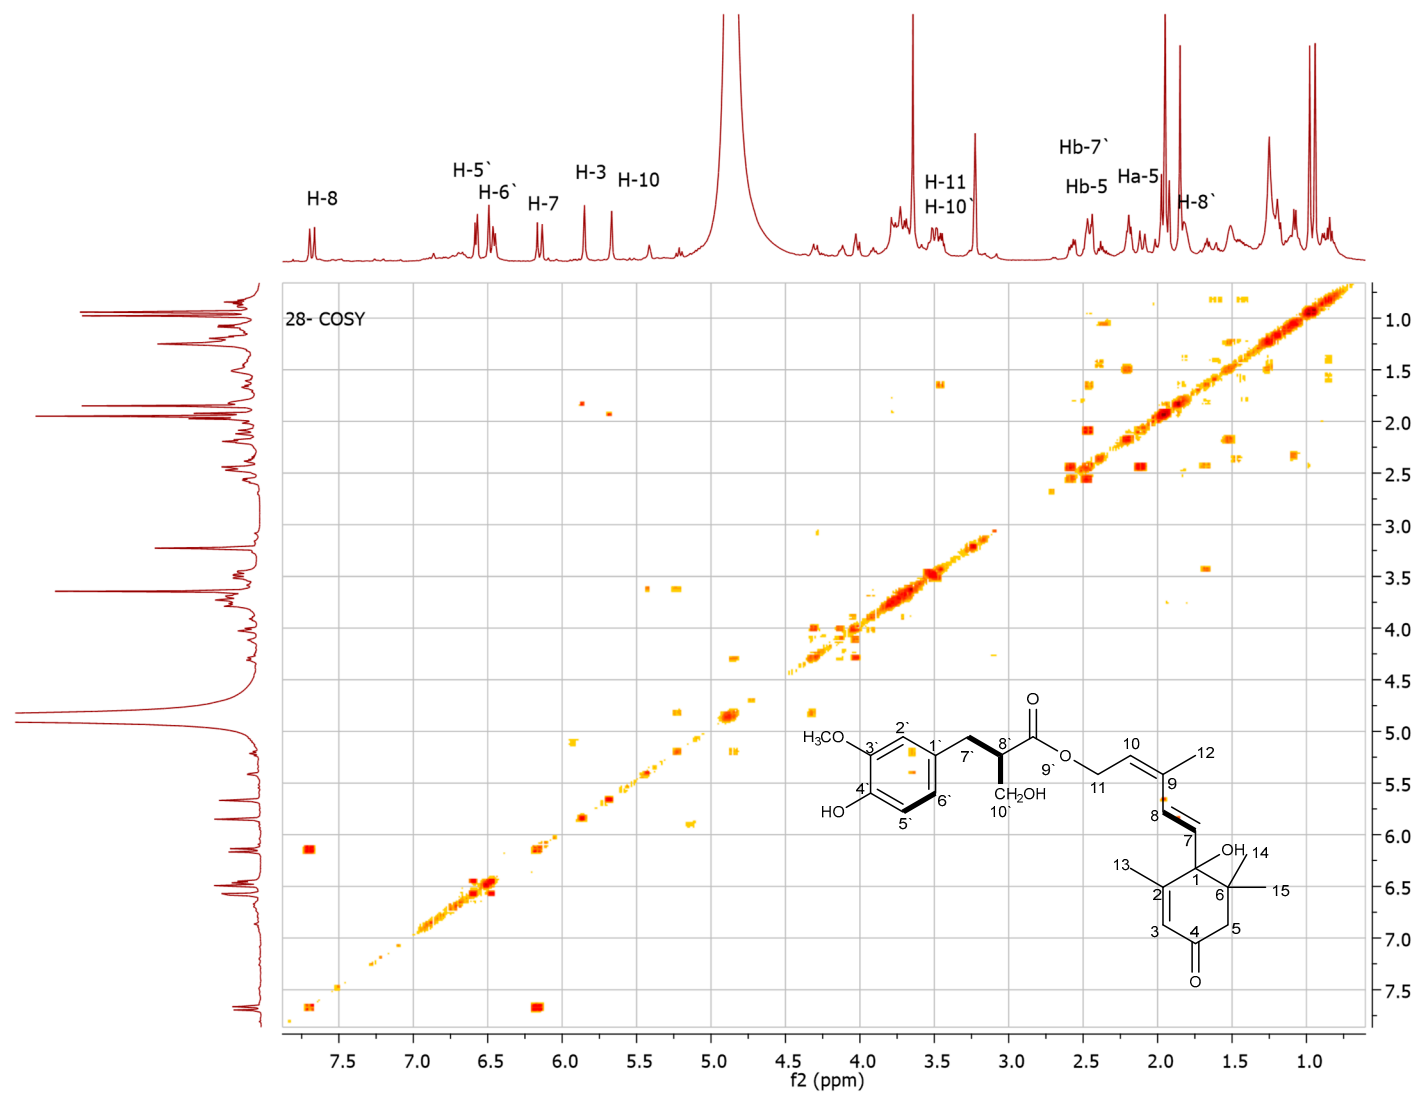

**Fig. S26.** COSY spectrum of **C5** in  $\text{CD}_3\text{OD}$ .

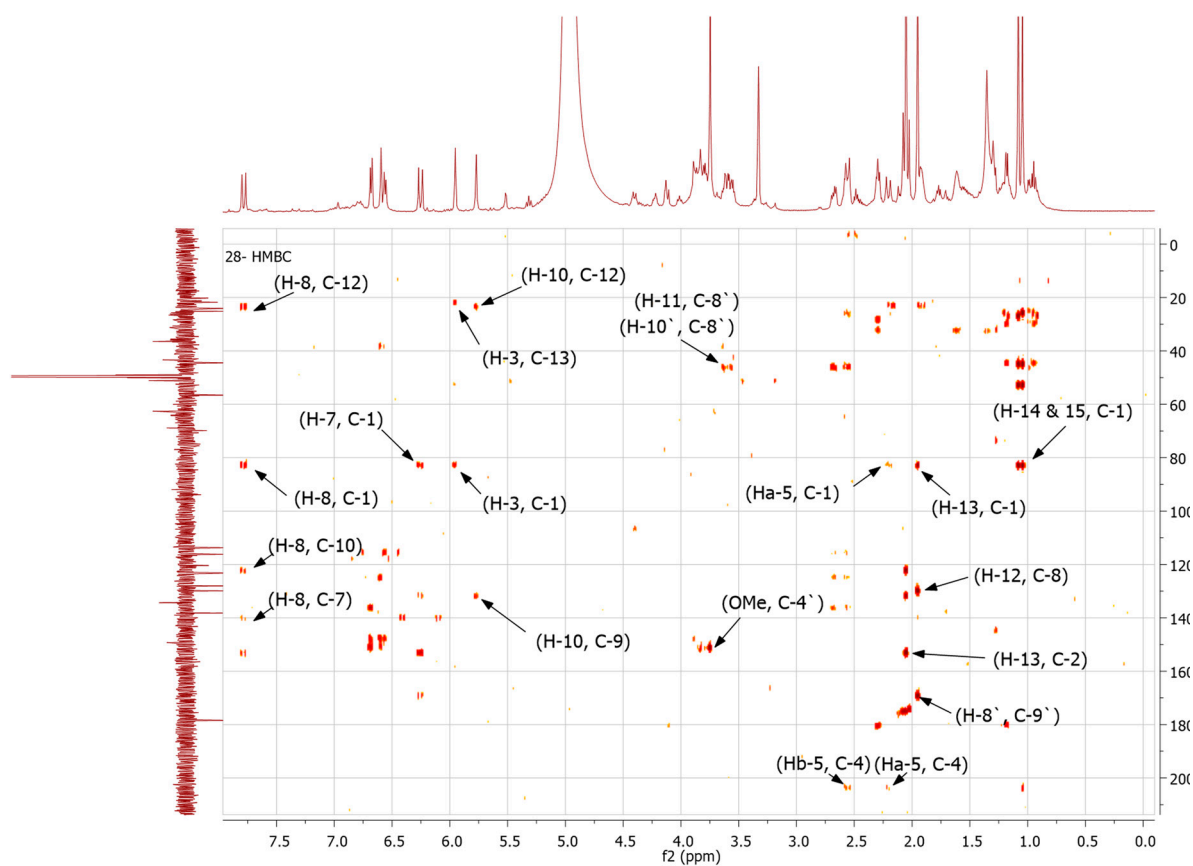

**Fig. S27.** HMBC spectrum of compound **C5** in CD<sub>3</sub>OD.

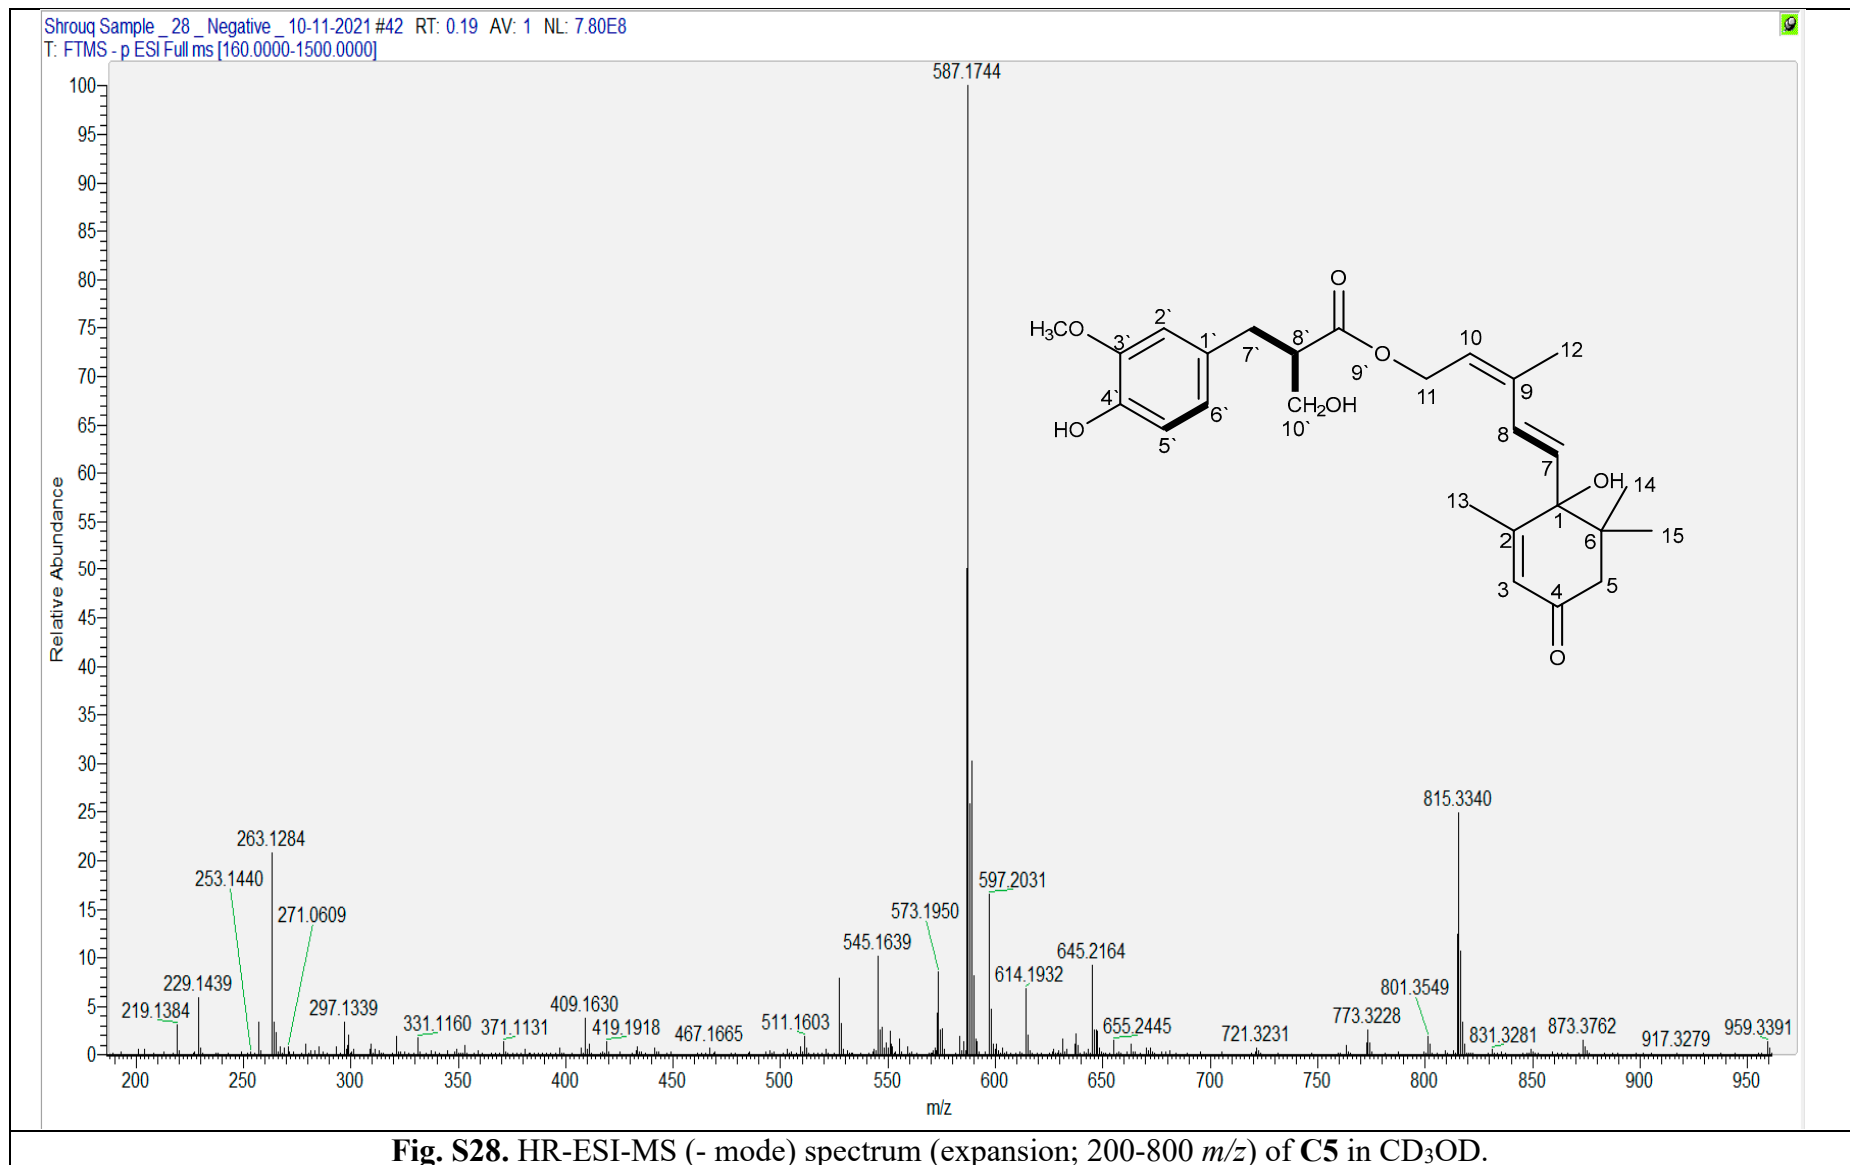

Shrouq Sample\_28\_Positive\_10-11-2021 #43 RT: 0.19 AV: 1 NL: 1.39E9  
FTMS + p ESI Full ms [160.0000-1500.0000]

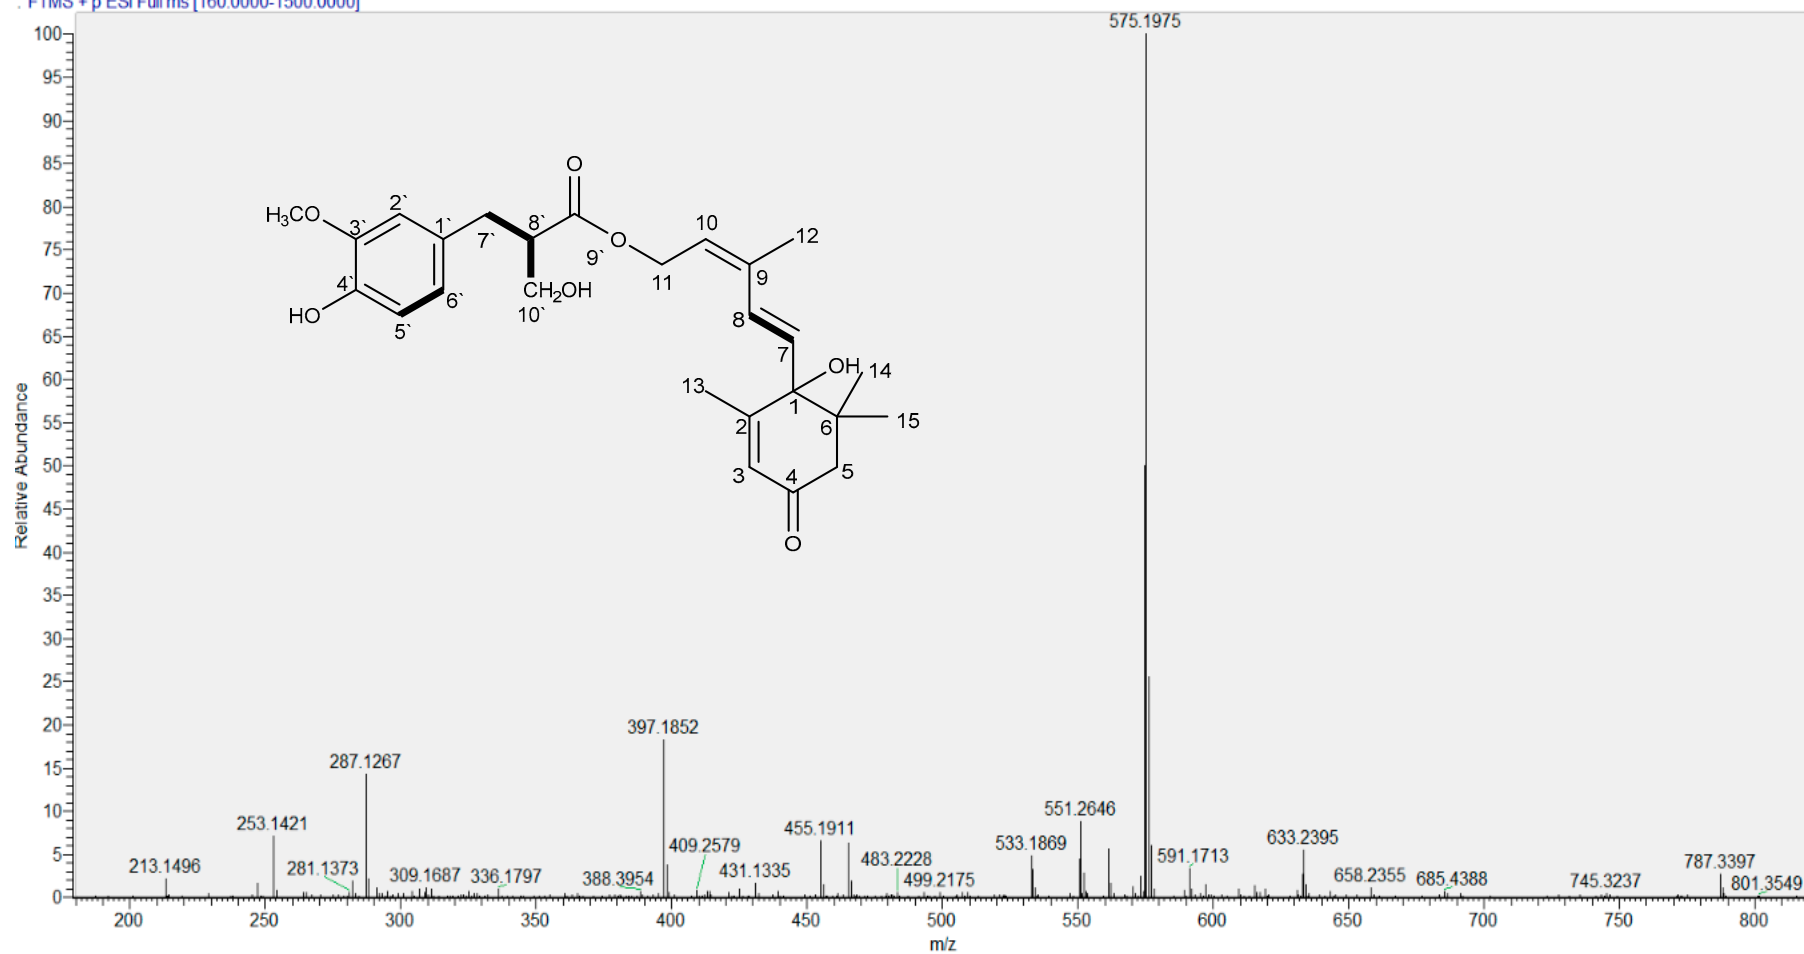

**Fig. S29.** HR-ESI-MS (+ mode) spectrum (expansion; 200-800 *m/z*) of C5 in CD<sub>3</sub>OD.

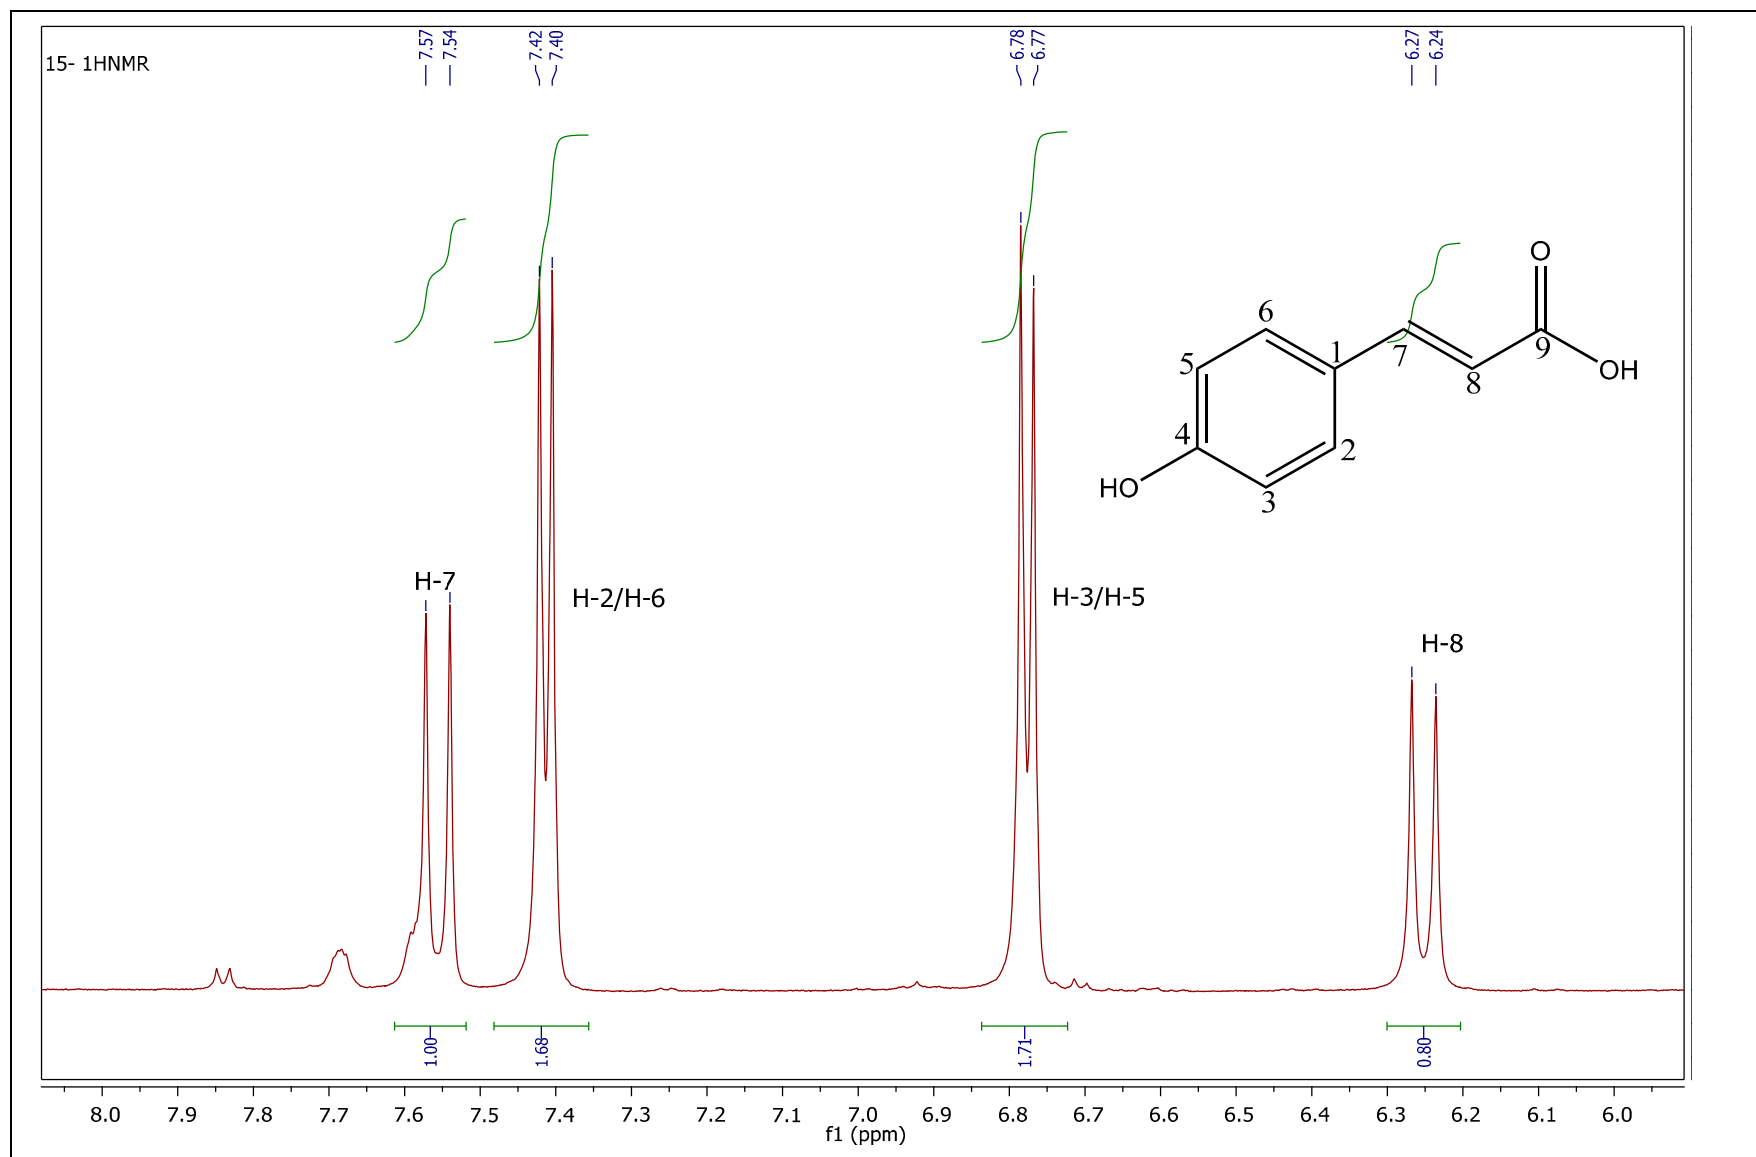



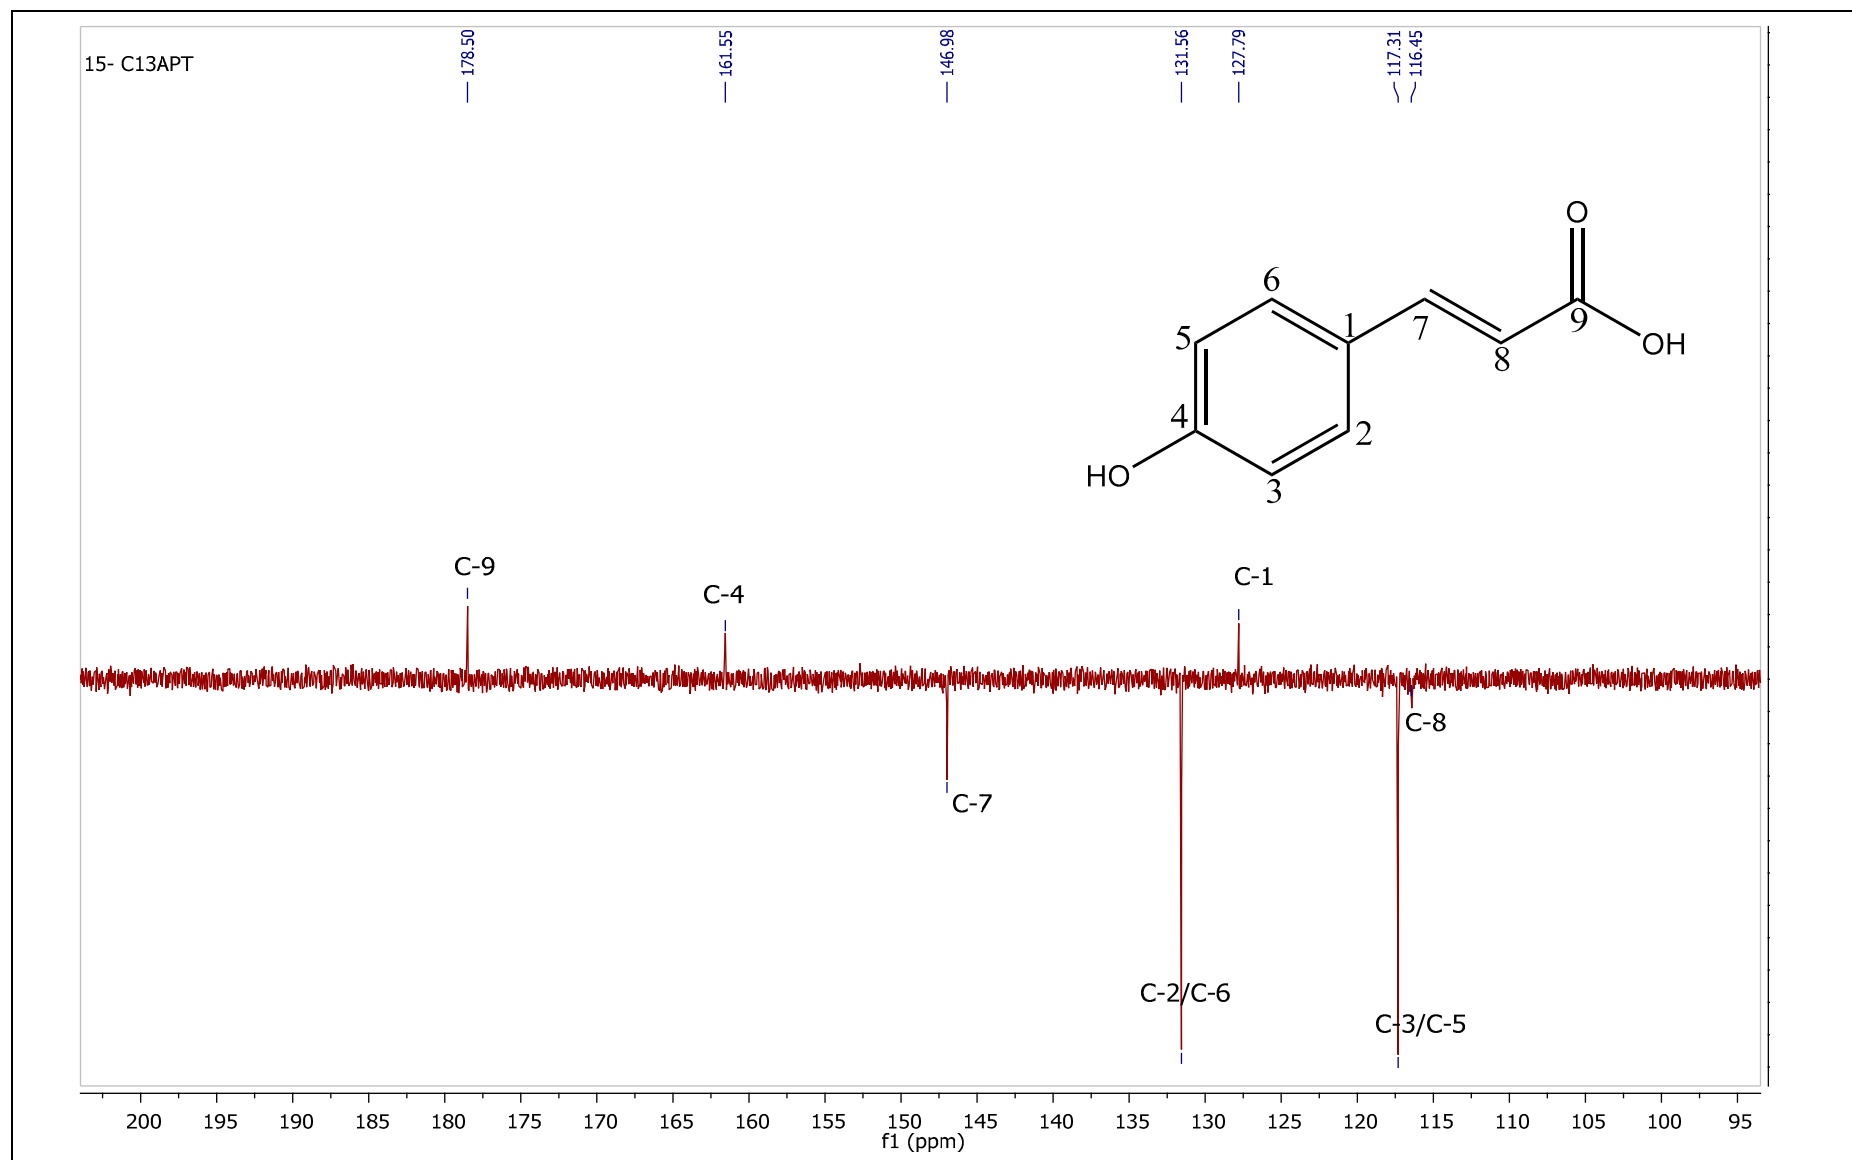

**Fig. S31.** APT spectrum (expansion; 95-200 ppm) of **C6** in CD<sub>3</sub>OD.

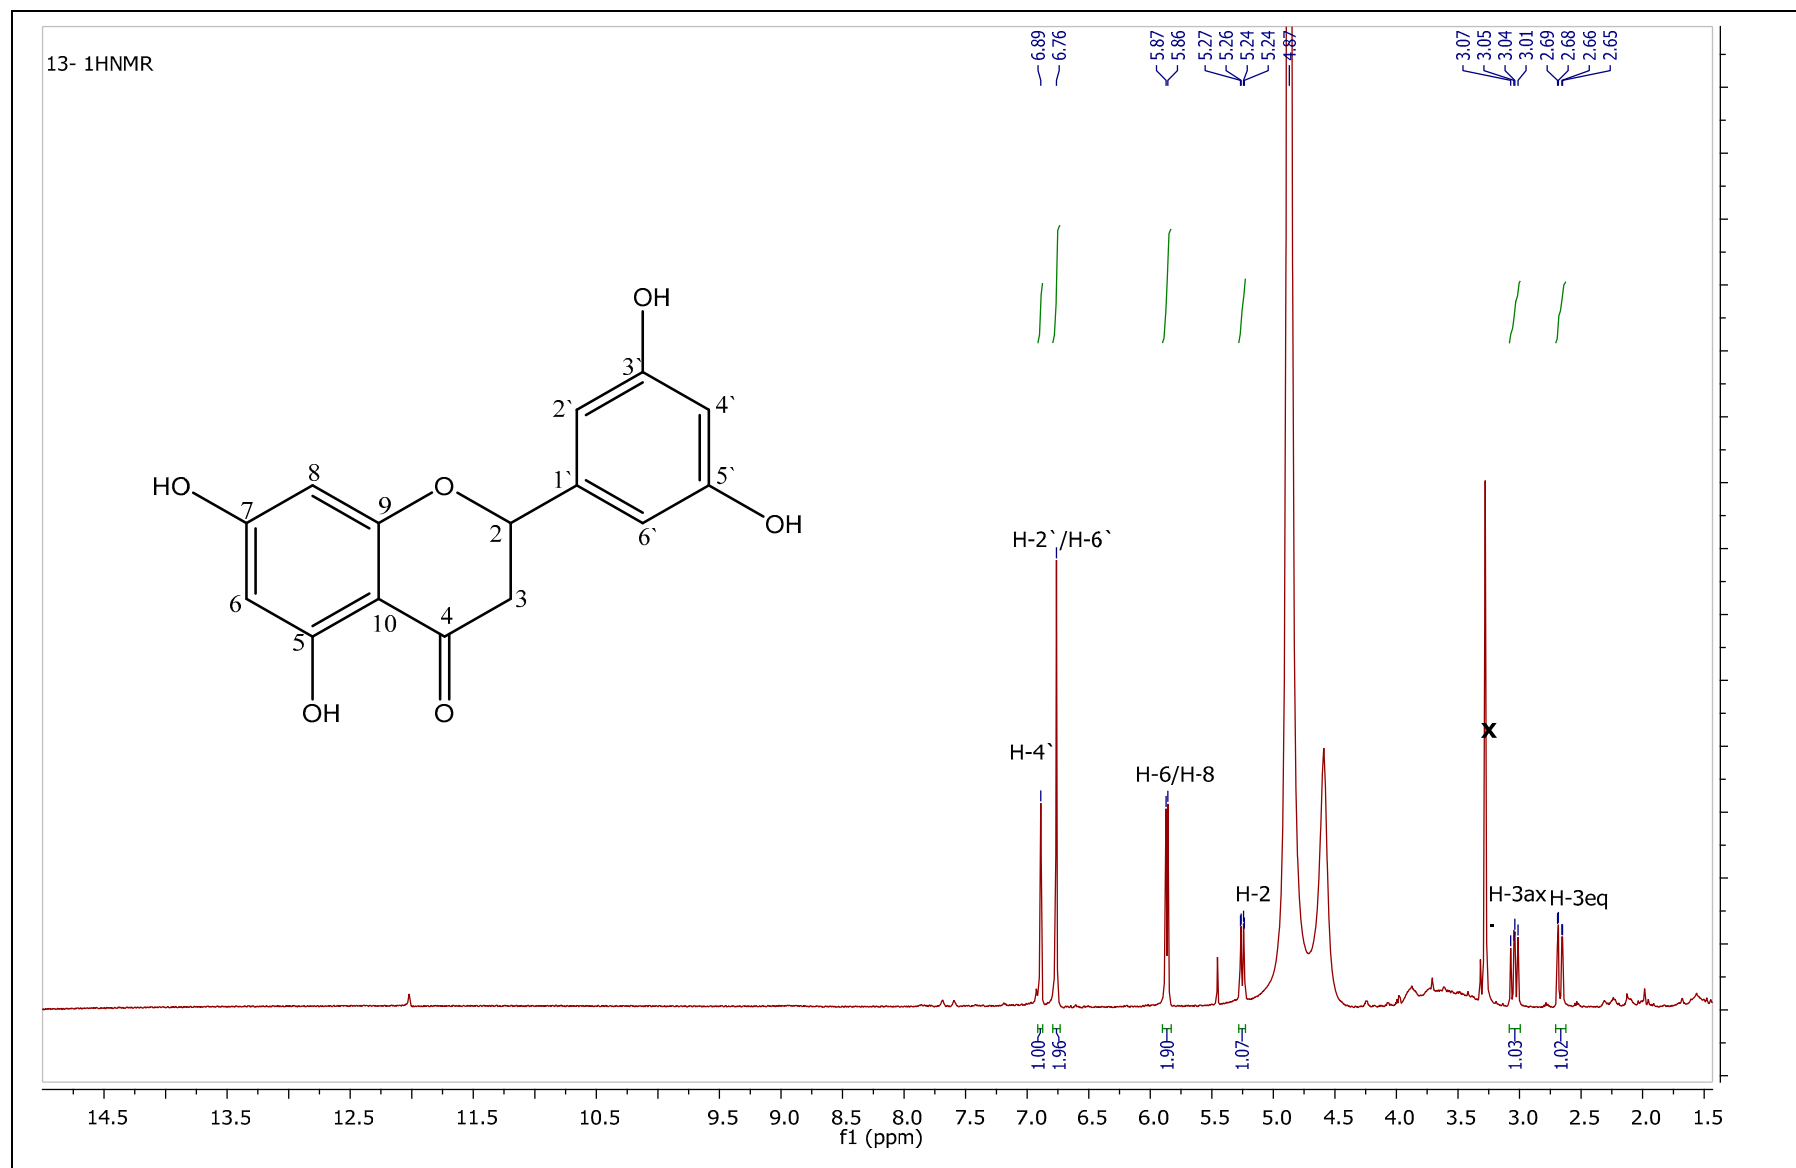

Fig. S32. <sup>1</sup>H-NMR spectrum of C7 in CD<sub>3</sub>OD.

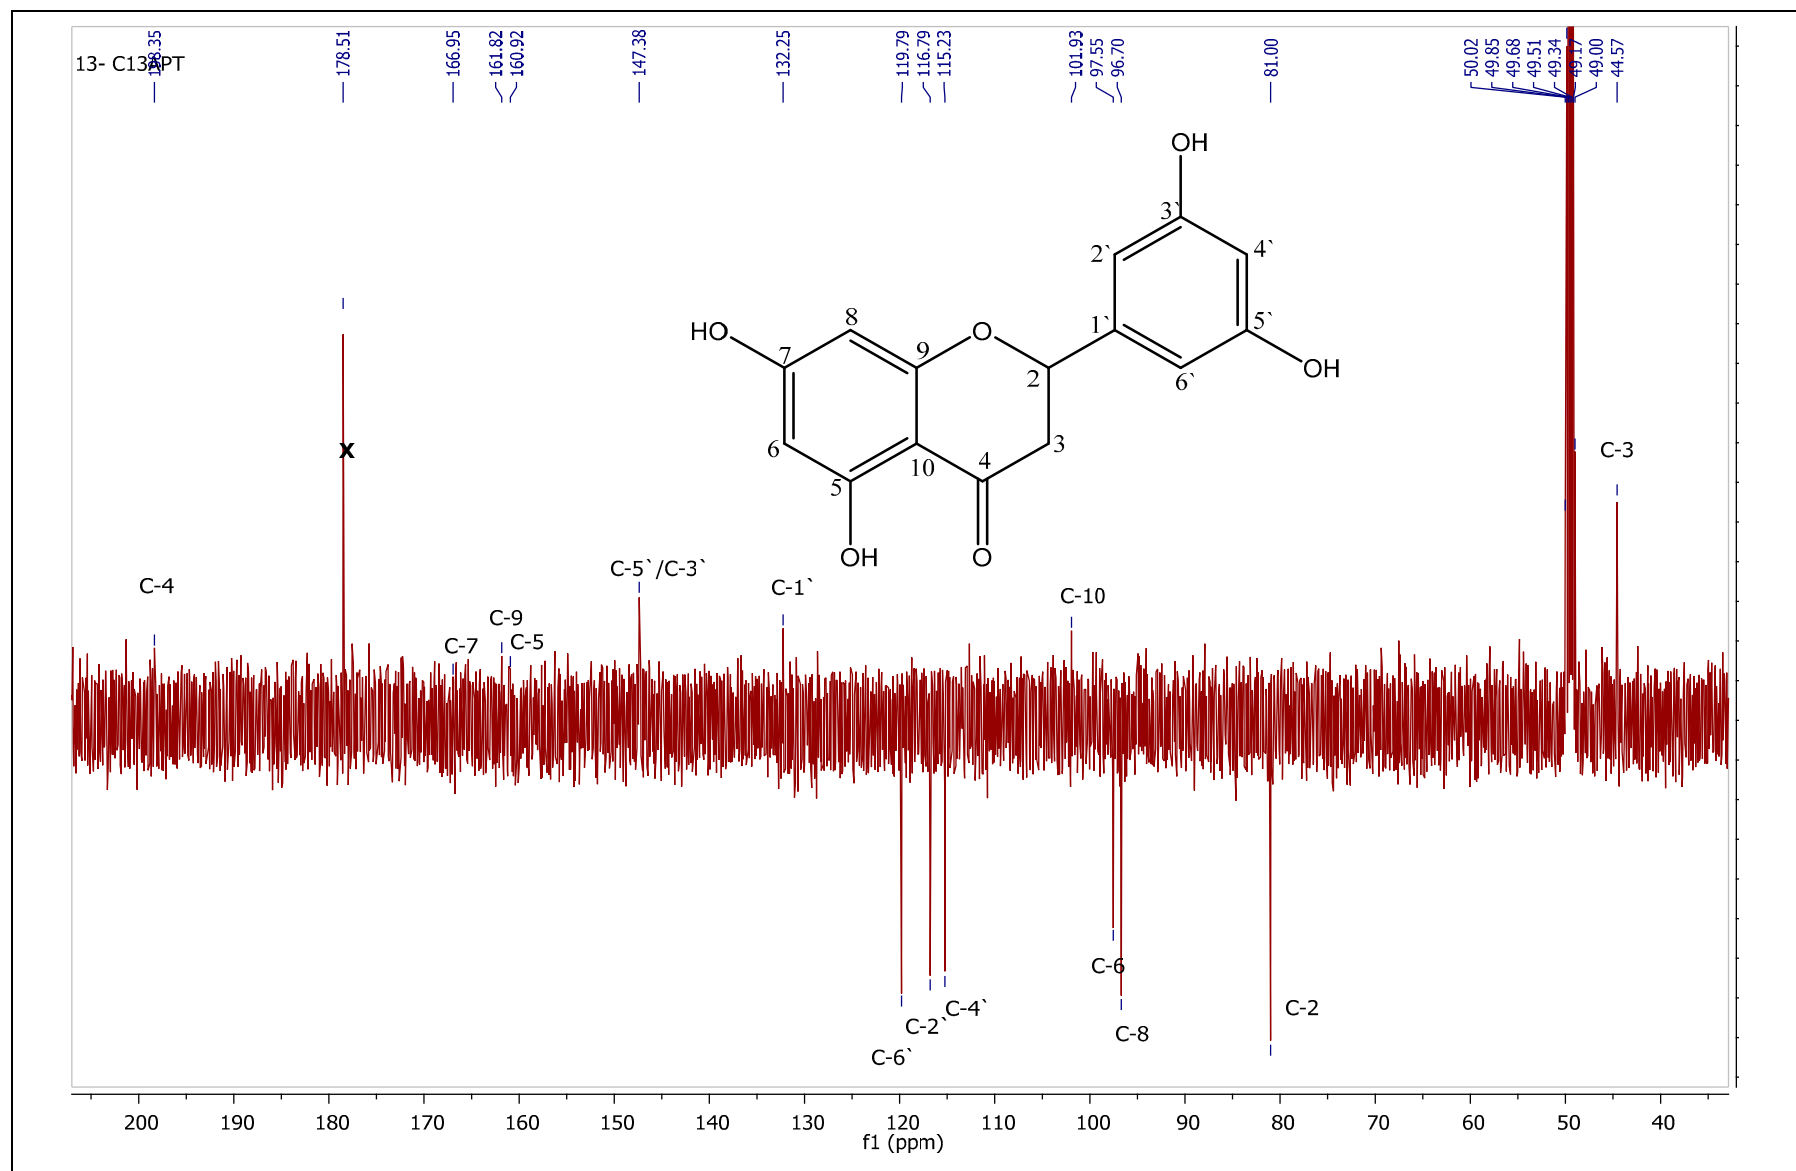

**Fig. S33.** APT spectrum (expansion; 30-210 ppm) of C7 in CD<sub>3</sub>OD.

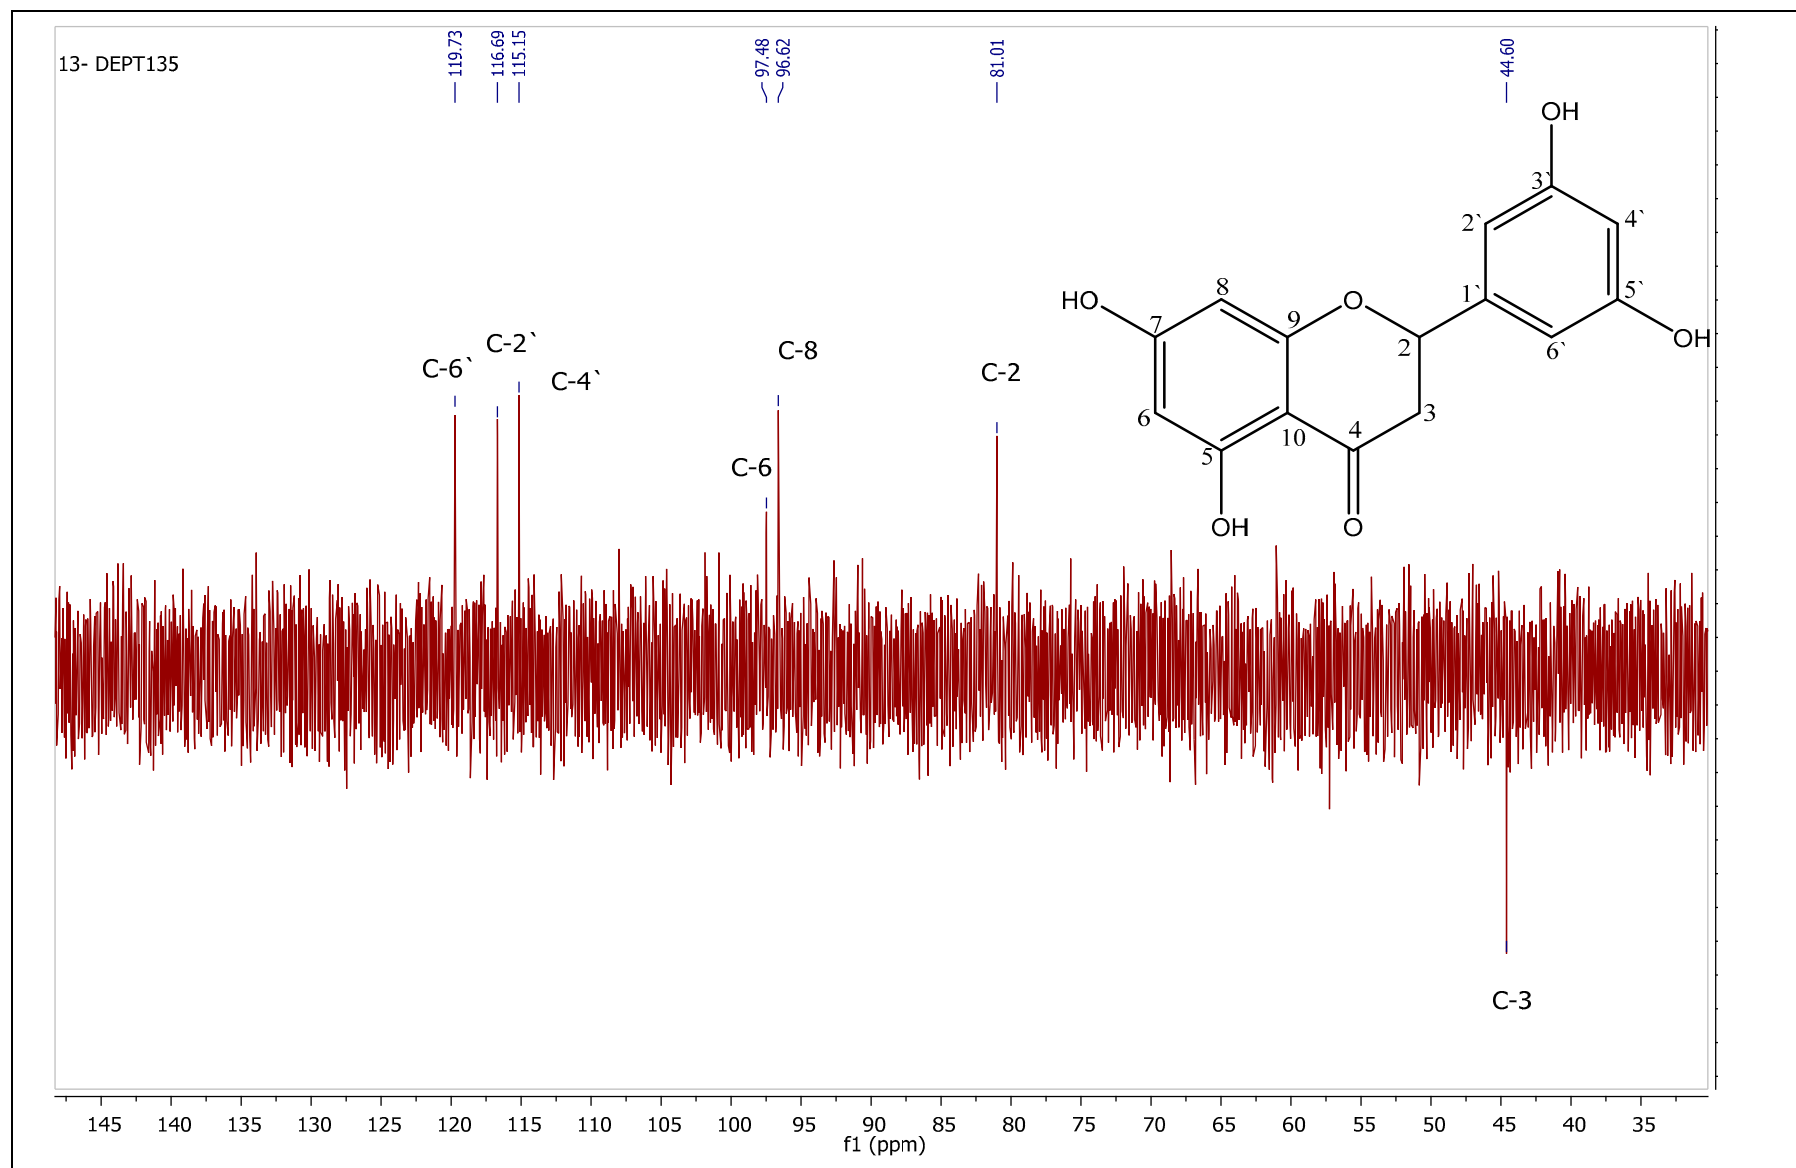

**Fig. S34.** DEPT spectrum (expansion; 30-145 ppm) of C7 in CD<sub>3</sub>OD.

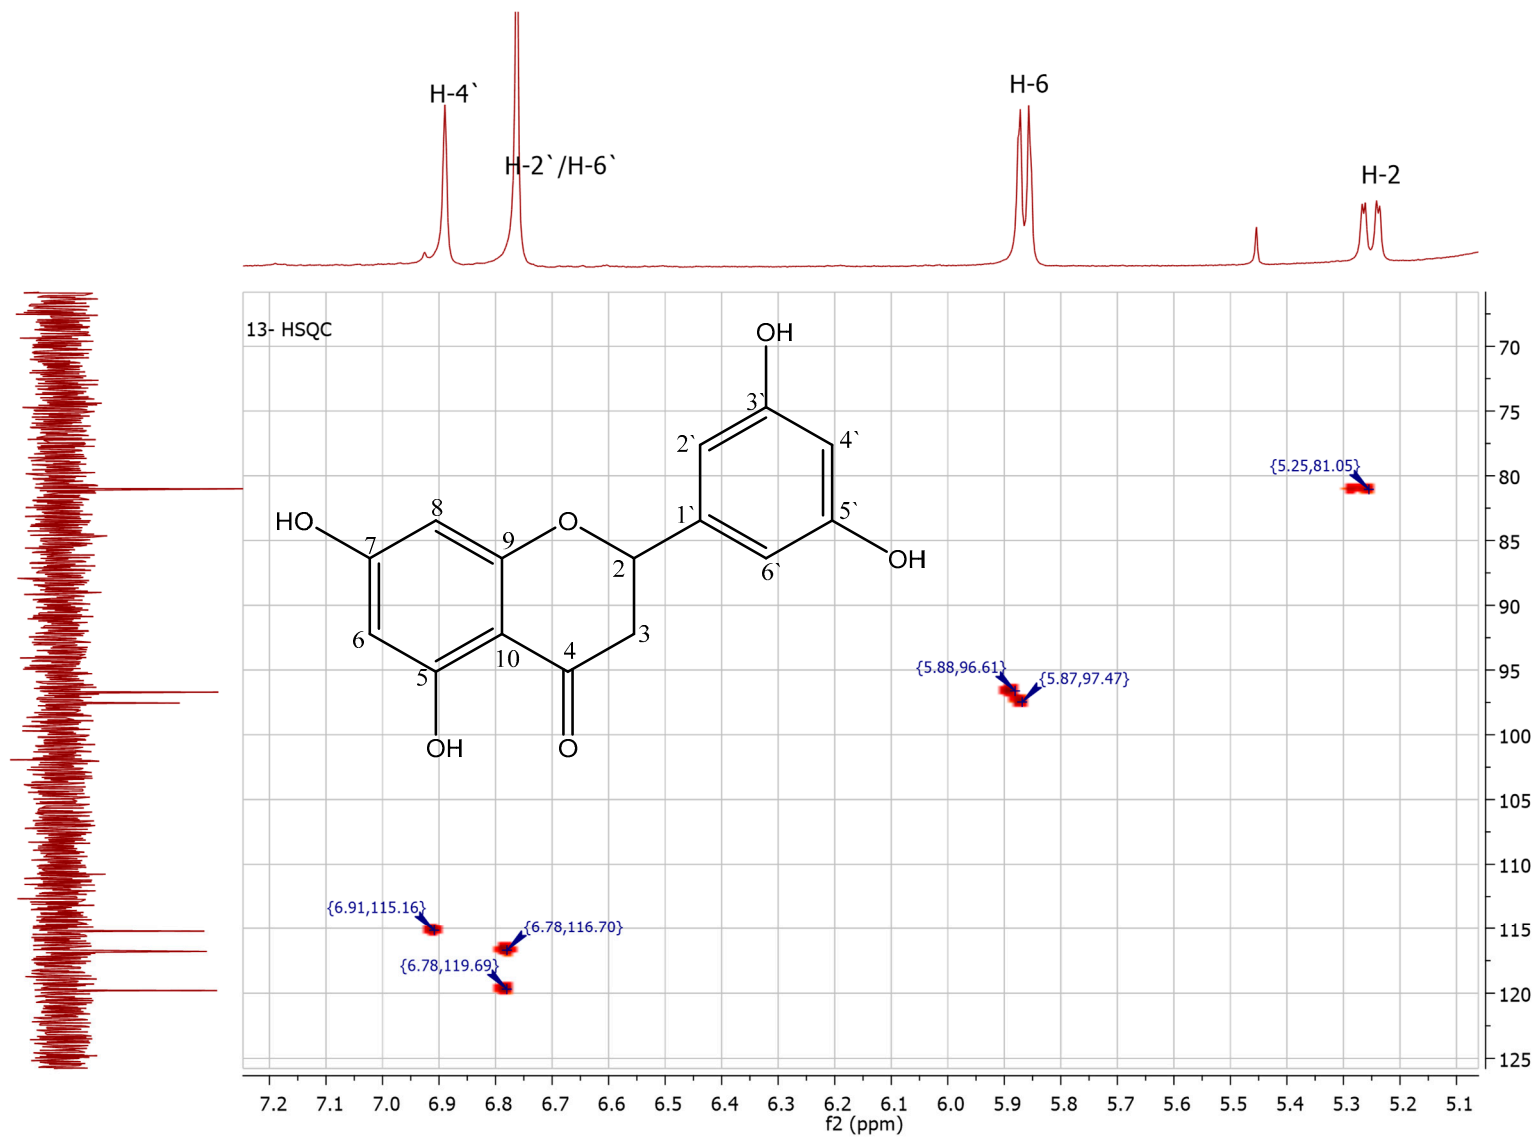

**Fig. S35.** HSQC spectrum (expansion; 5.1-7.2 ppm) of C7 in CD<sub>3</sub>OD.

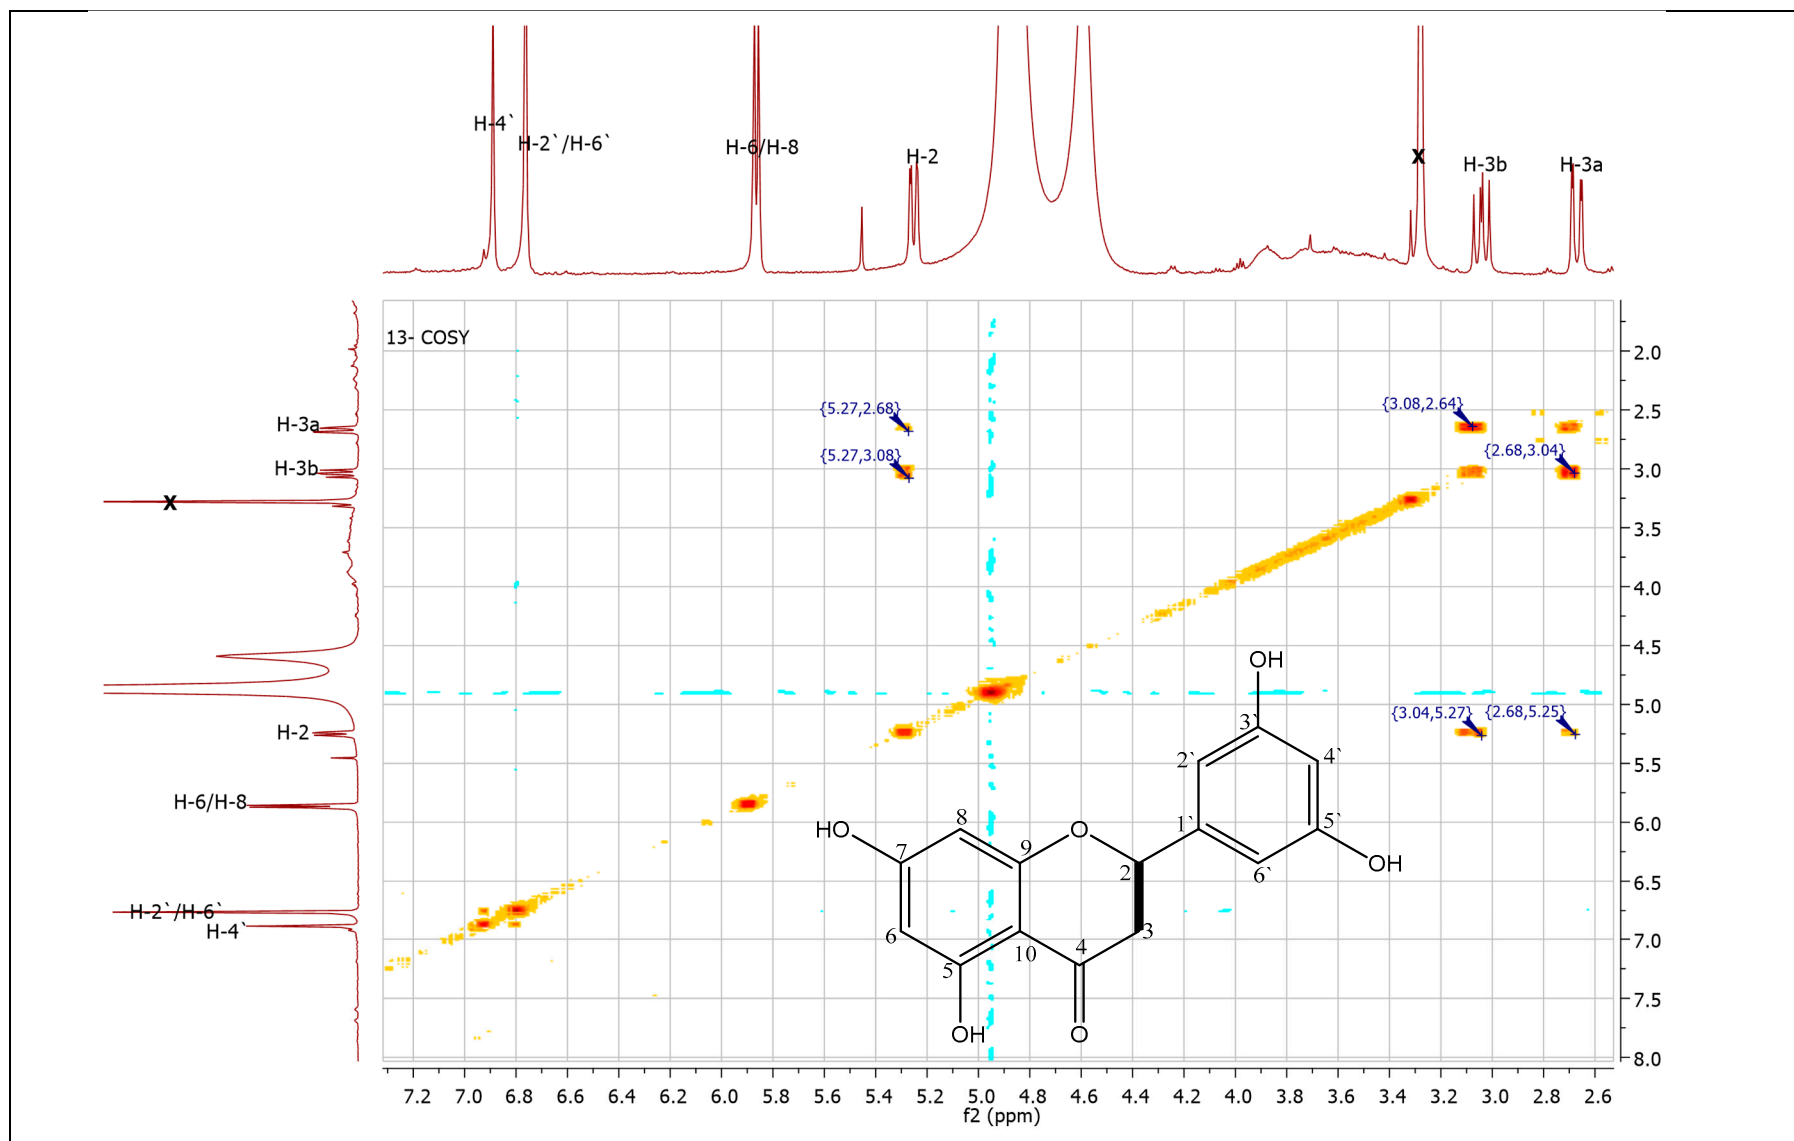

**Fig. S36.** COSY spectrum (expansion; 2.6-7.2 ppm) of **C7** in CD<sub>3</sub>OD.

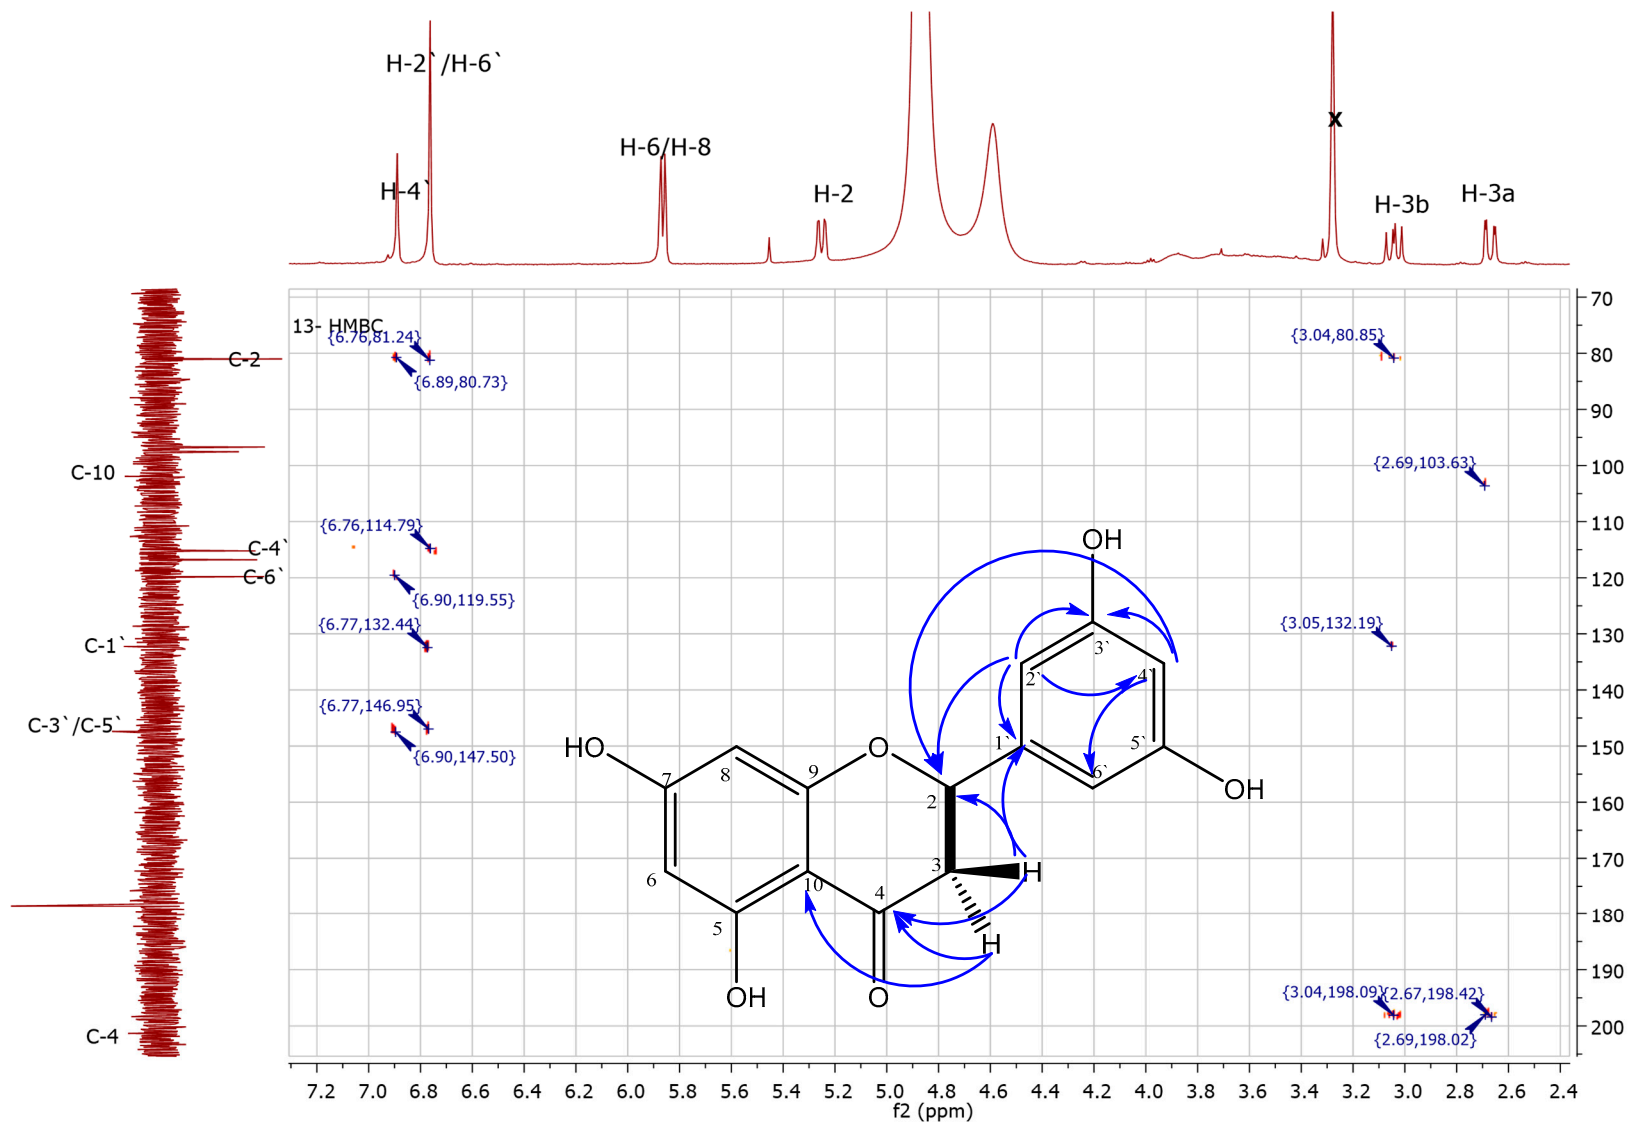

Fig. S37. HMBC spectrum (expansion; 2.4-7.2 ppm) of compound C7 in CD<sub>3</sub>OD.

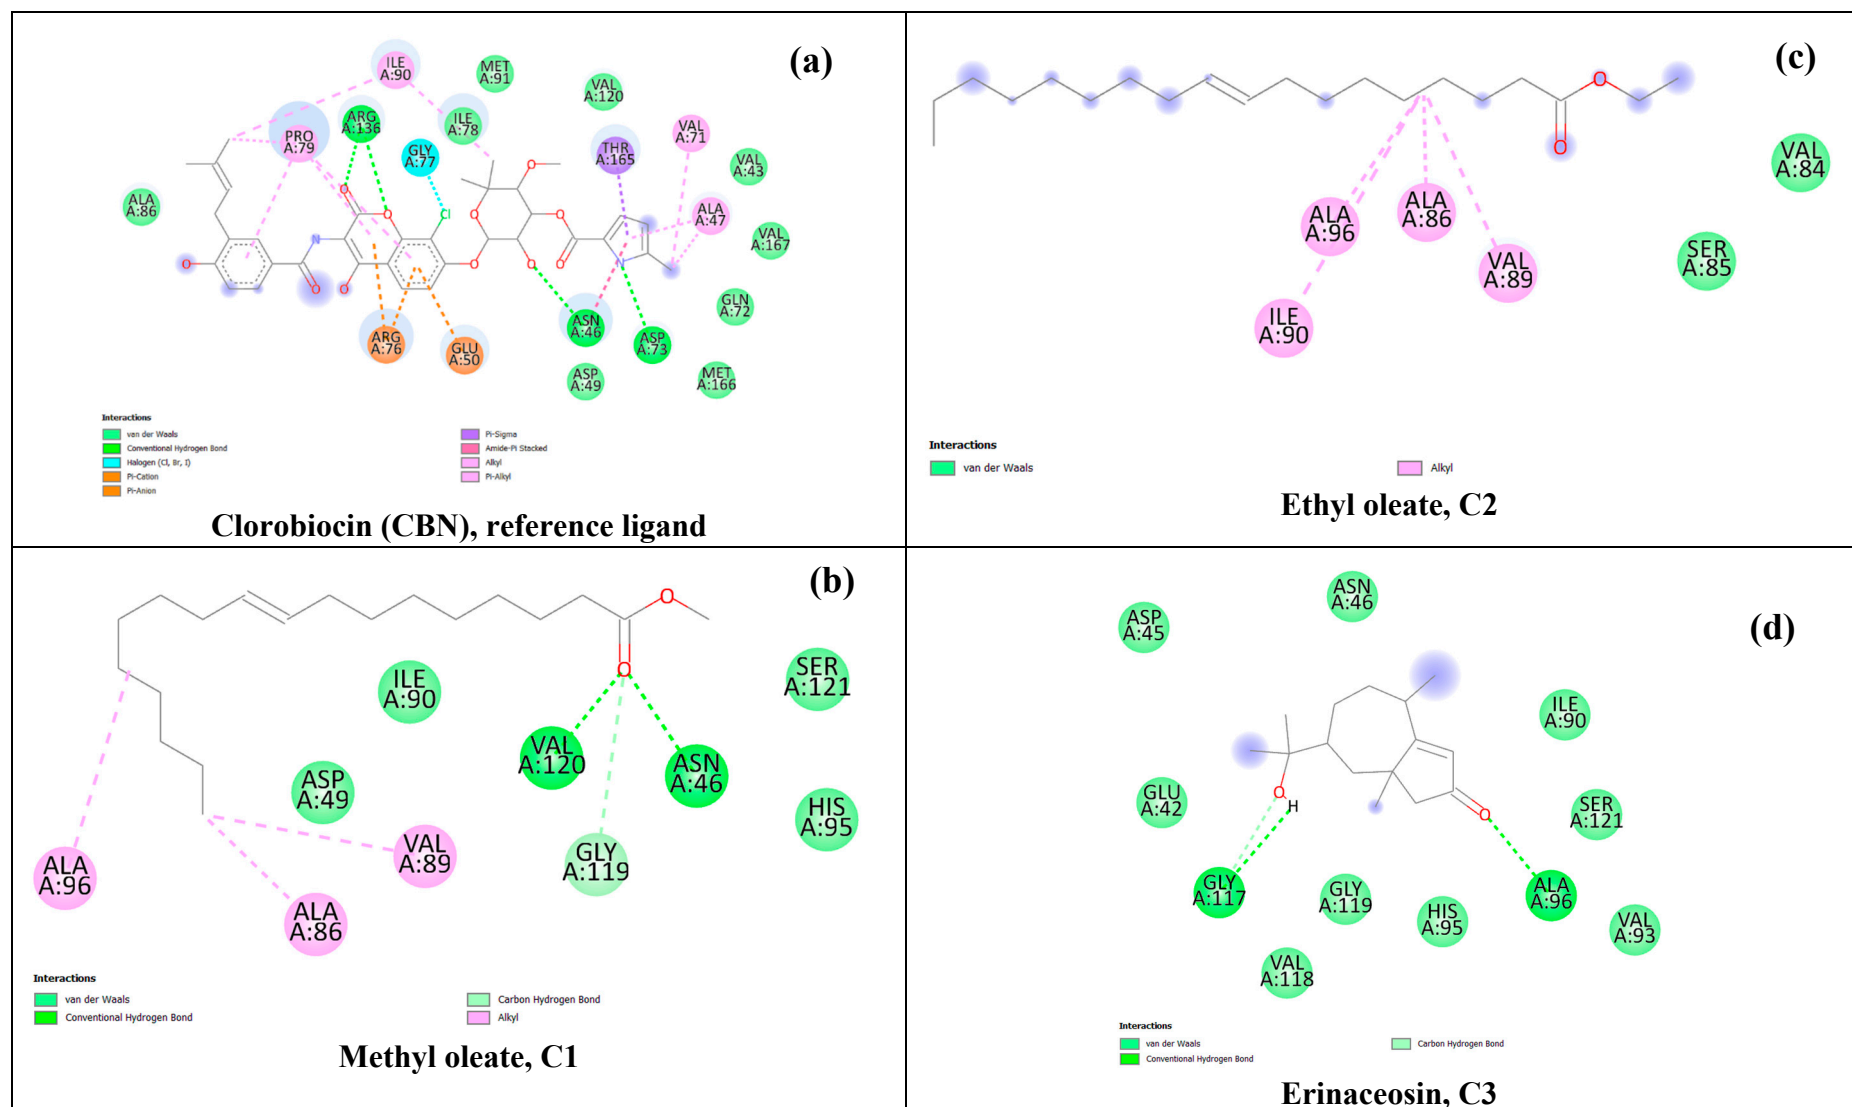



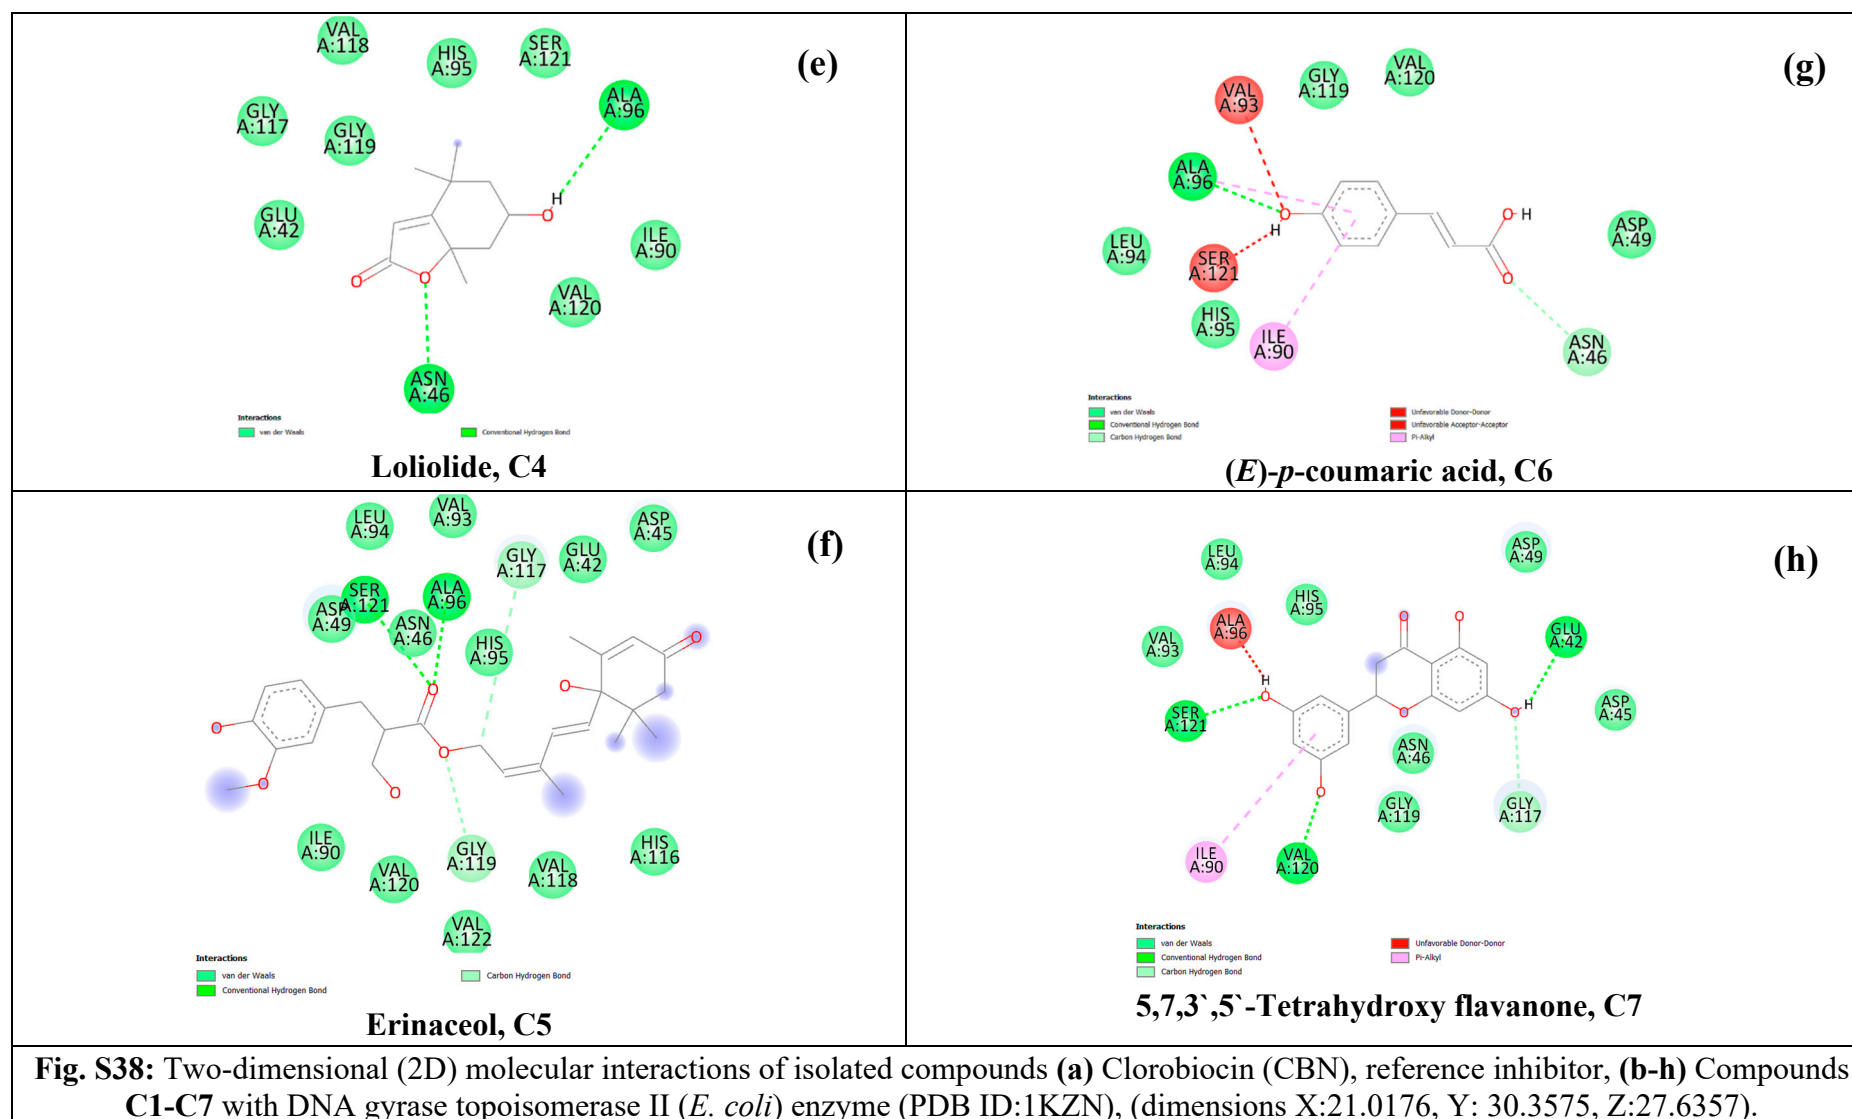

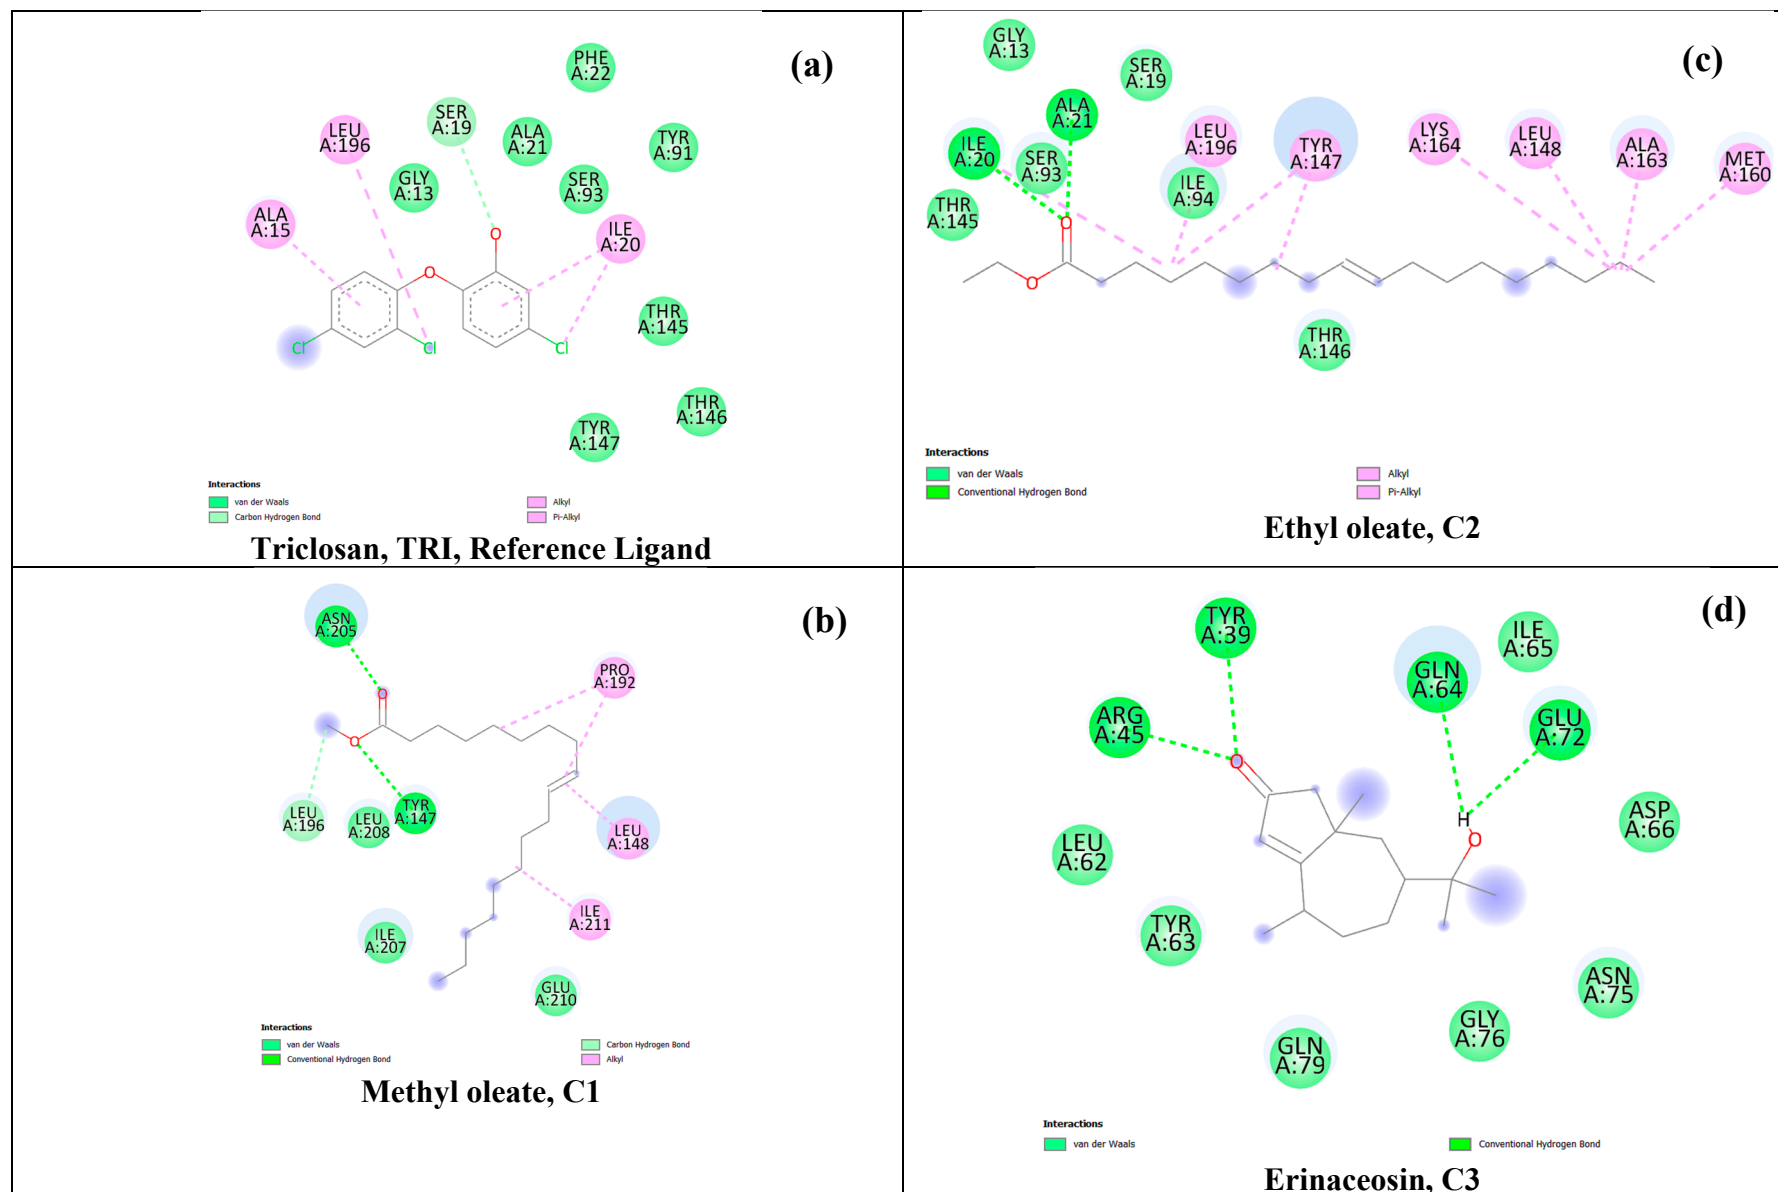

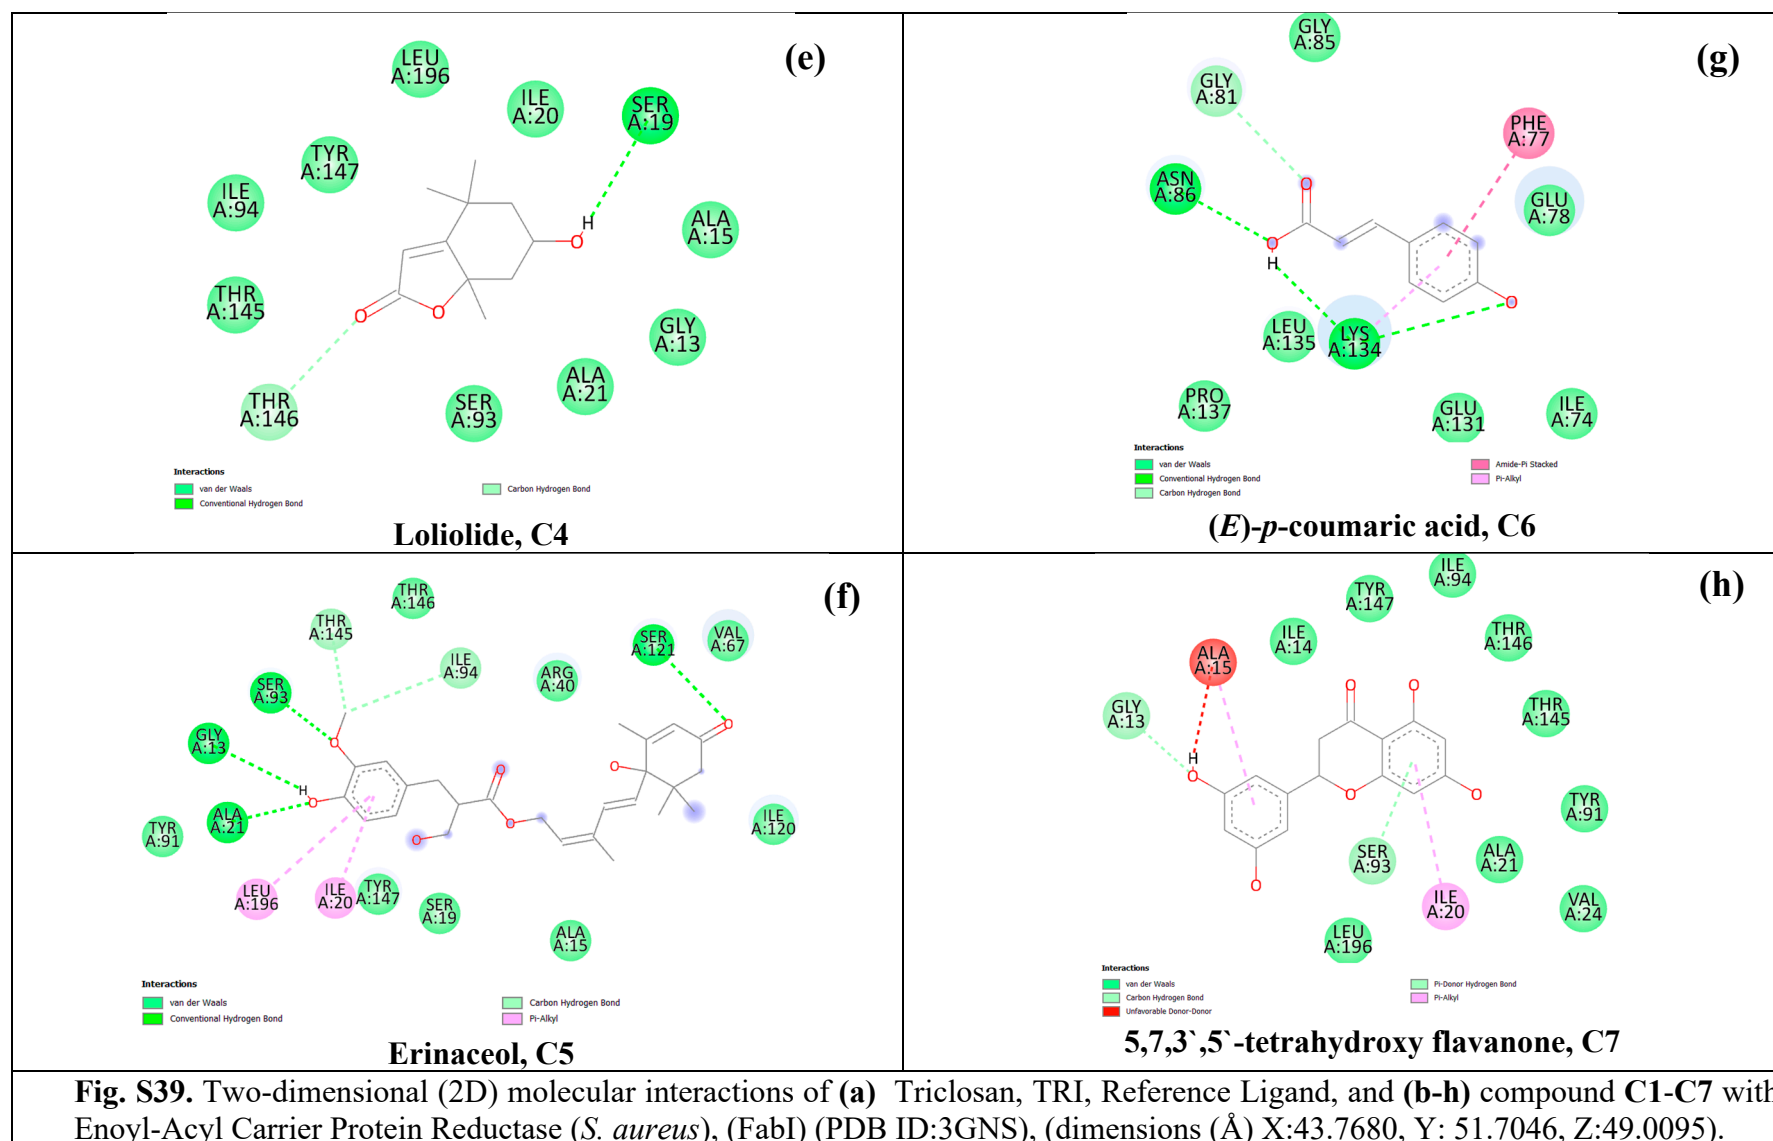

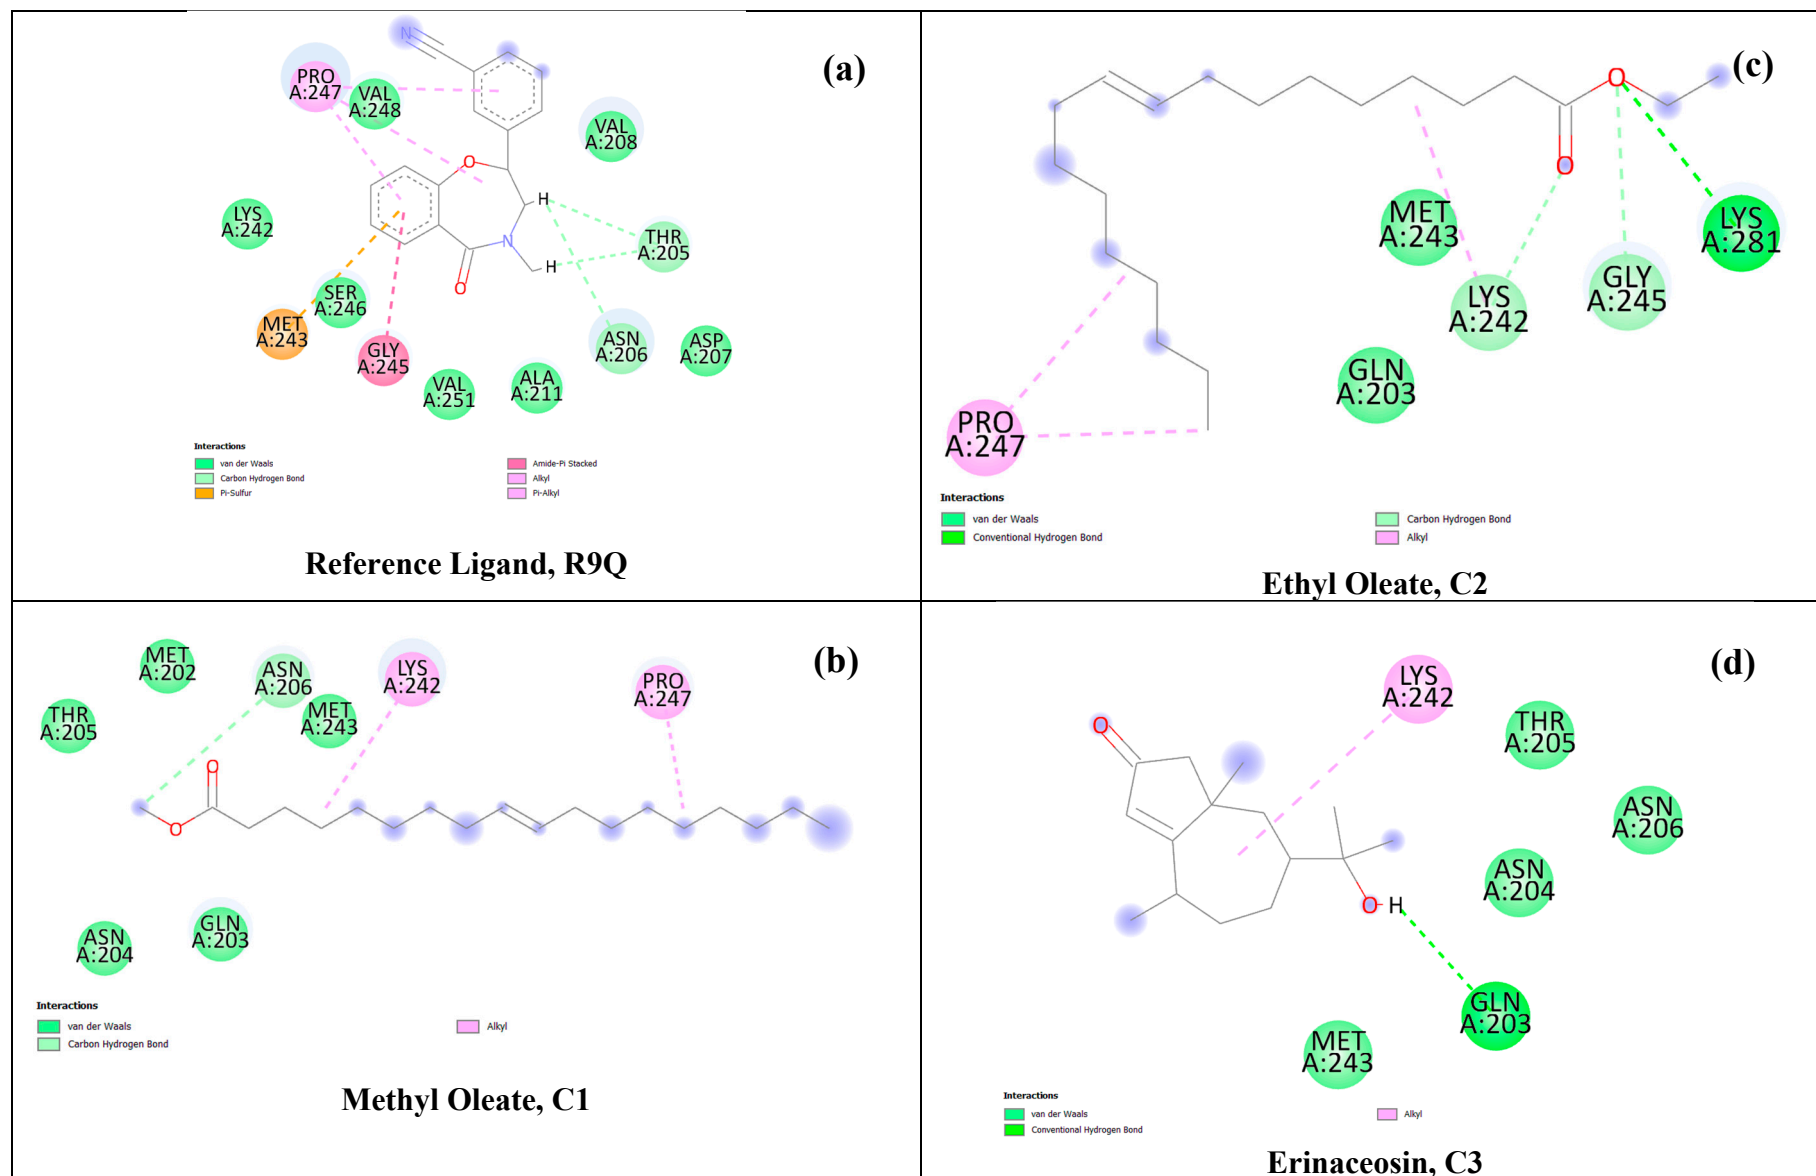

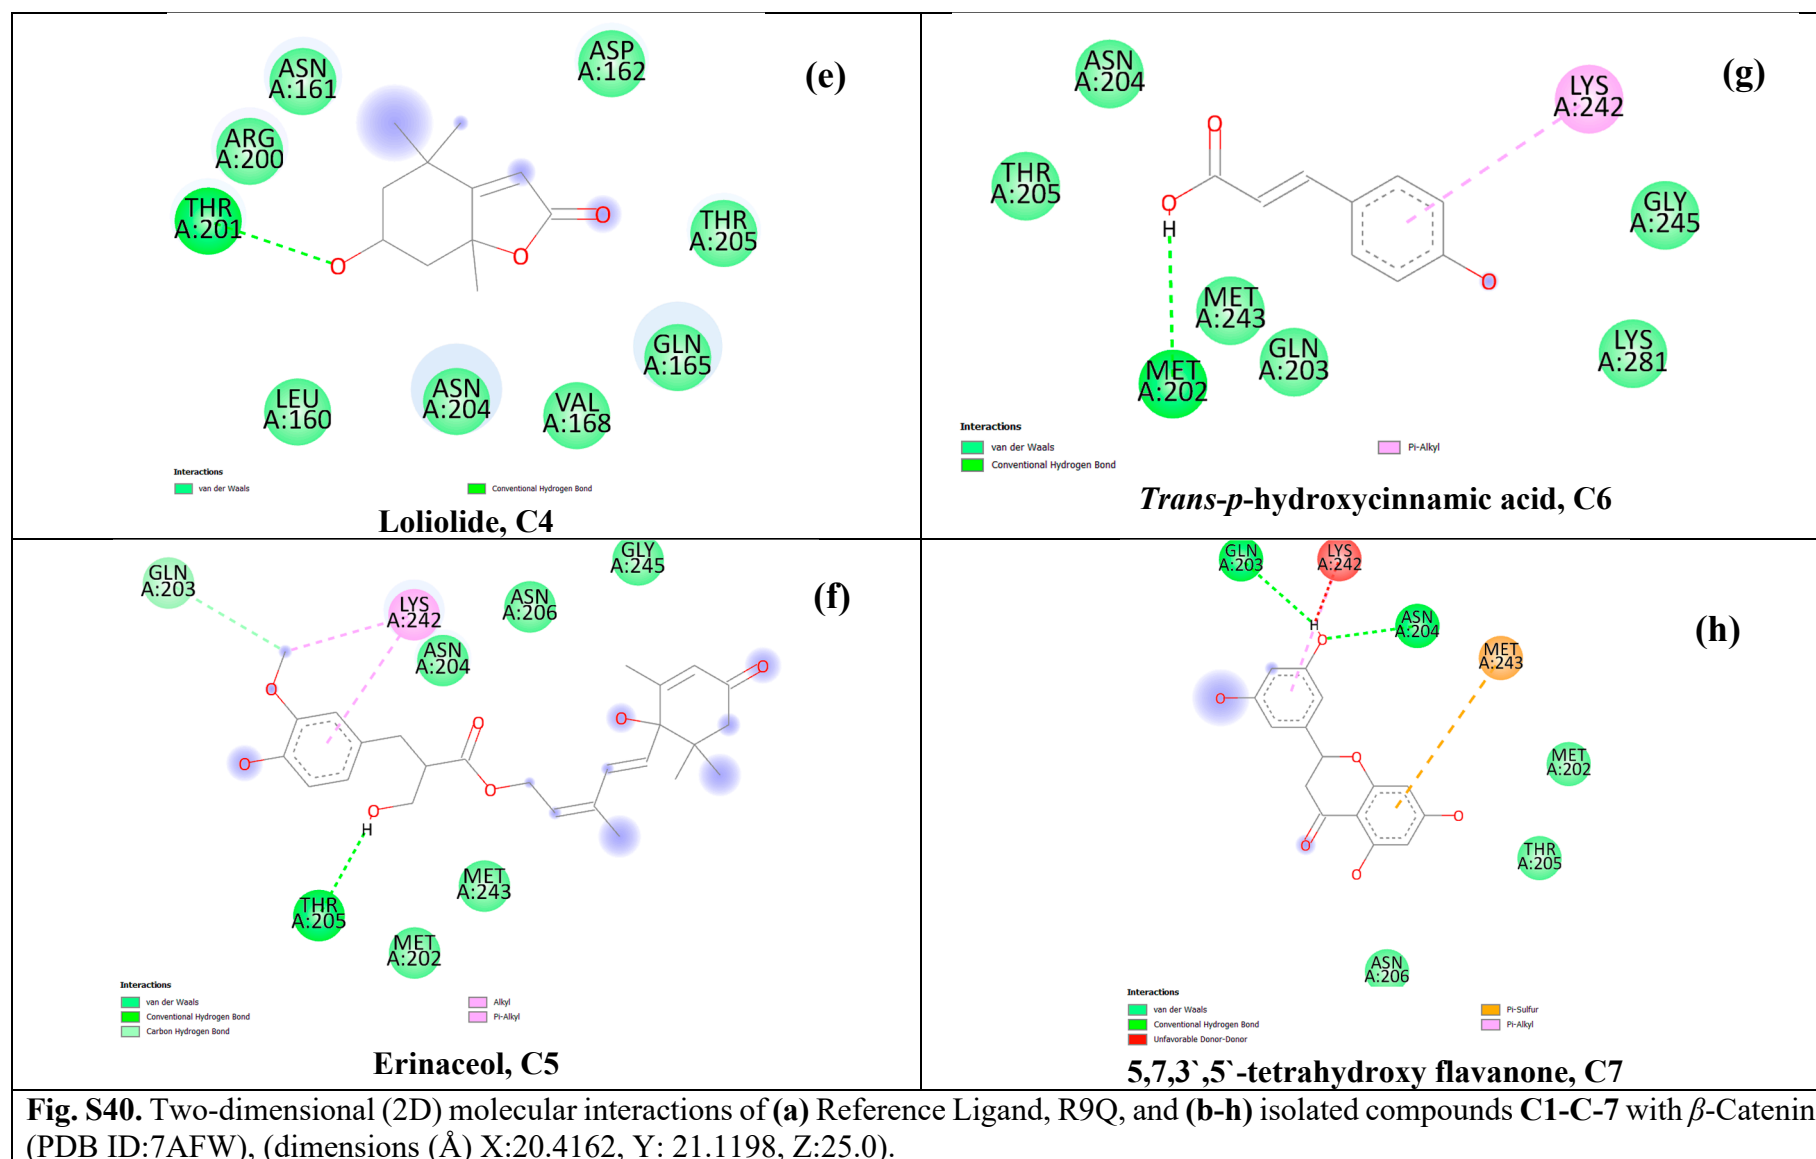

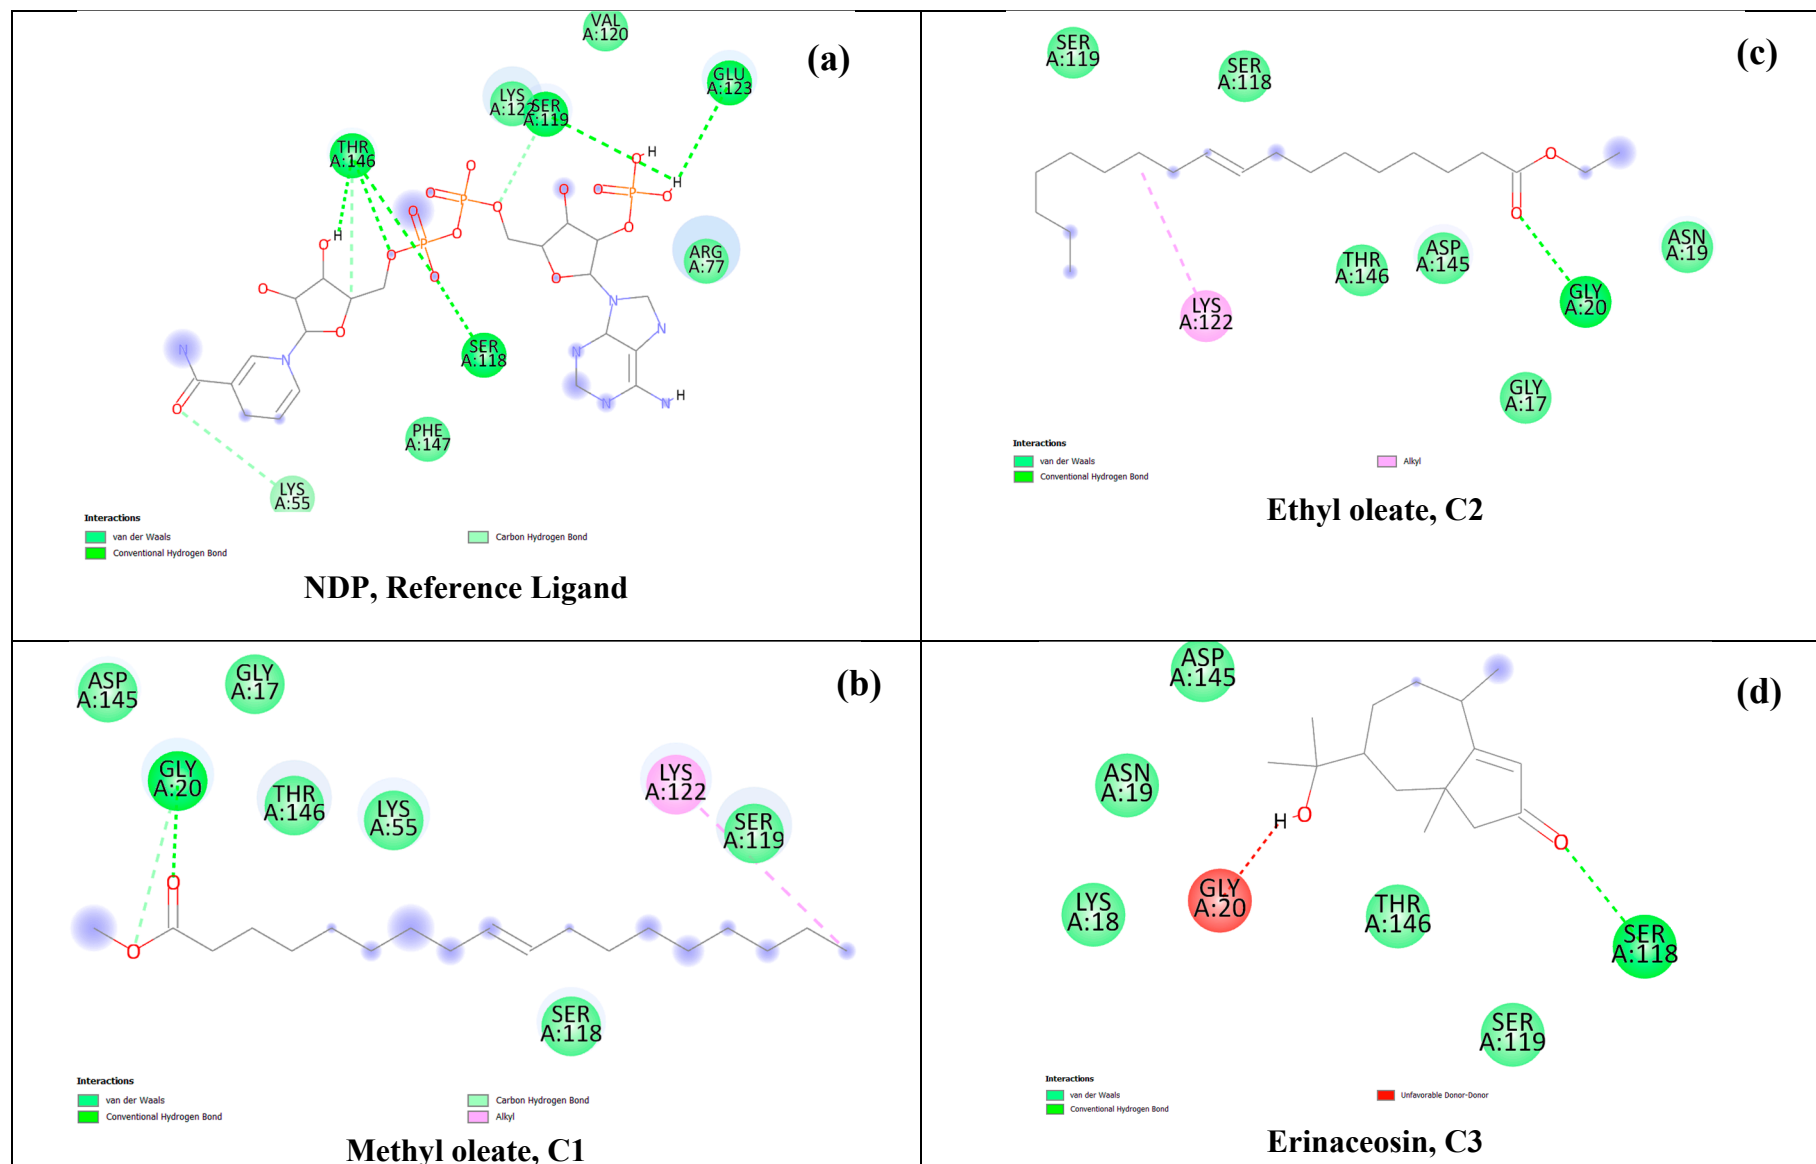

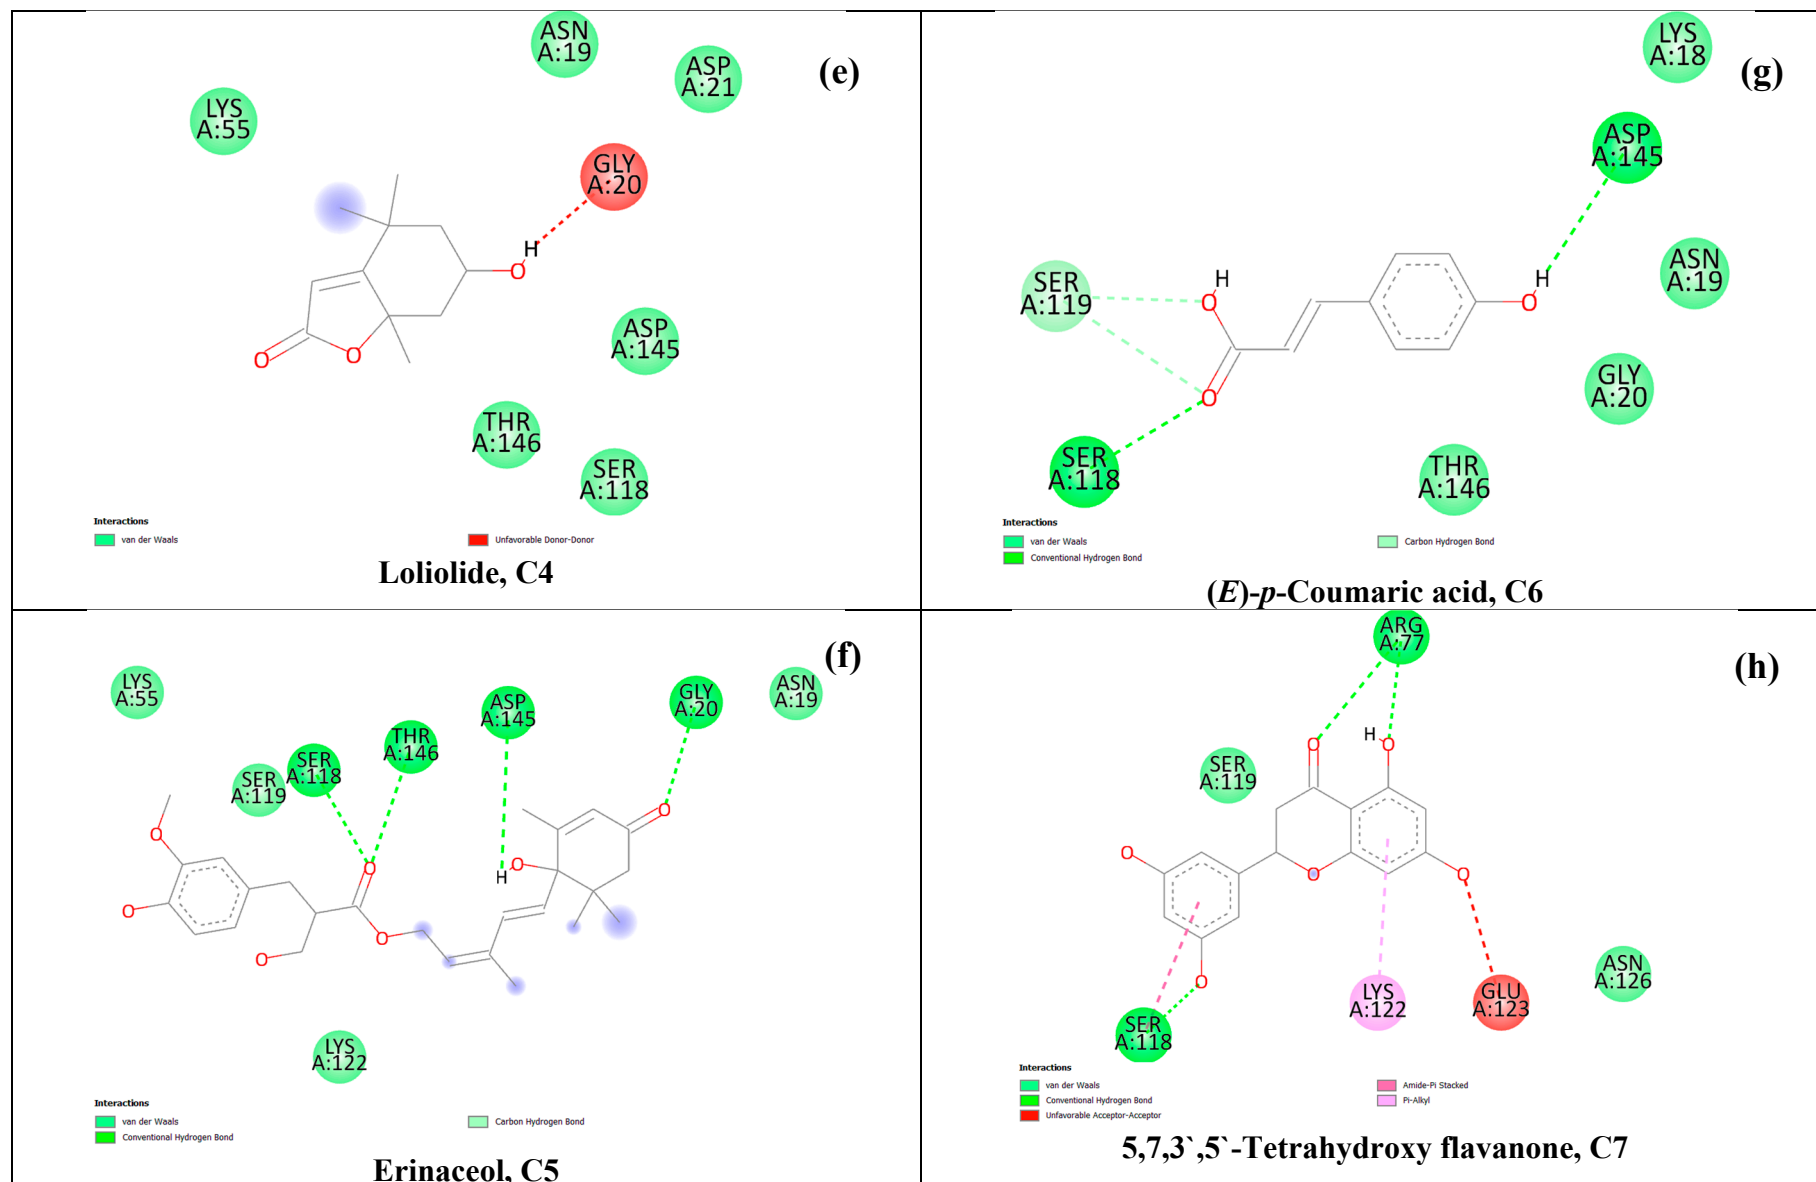

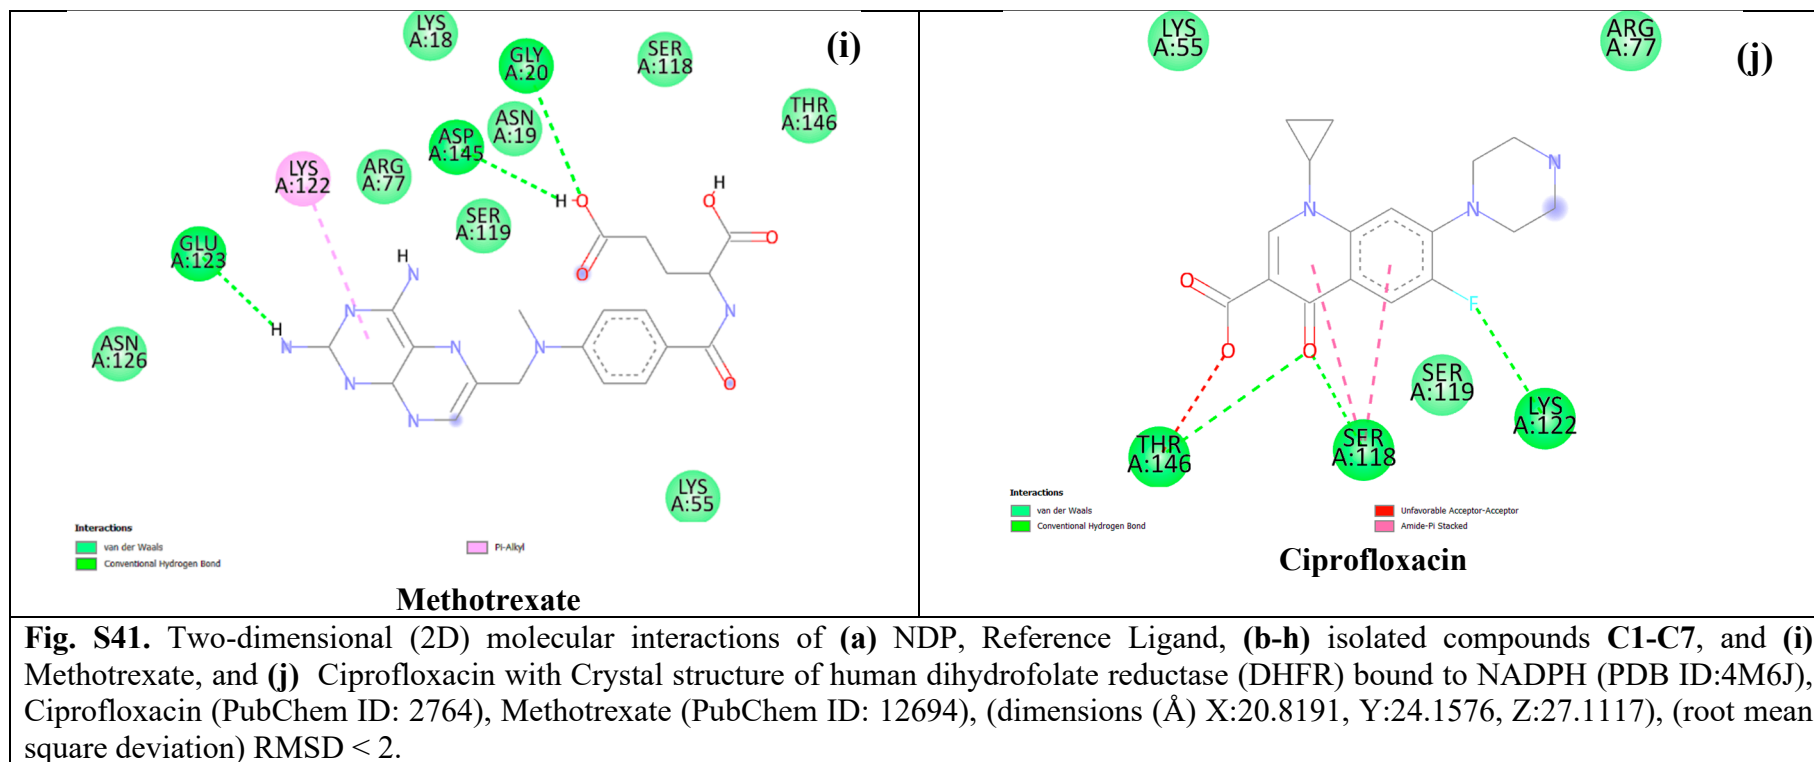



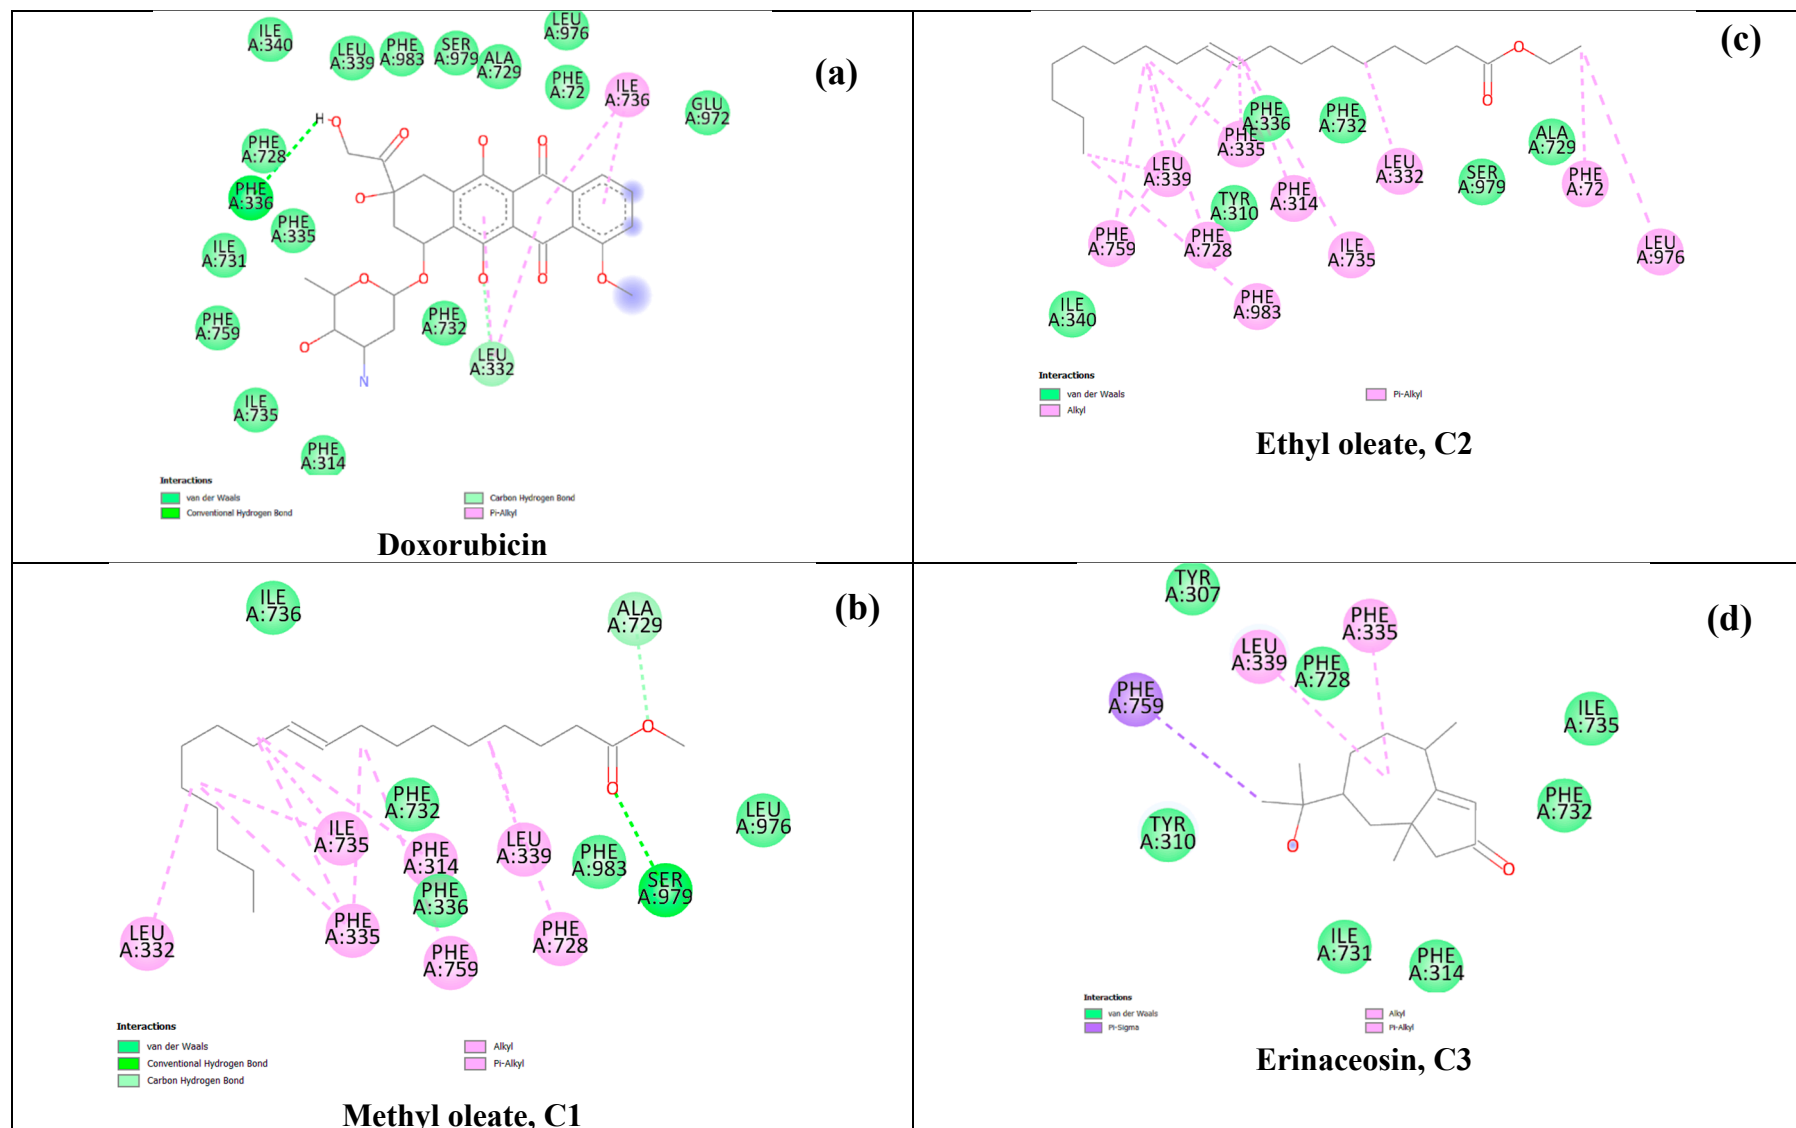

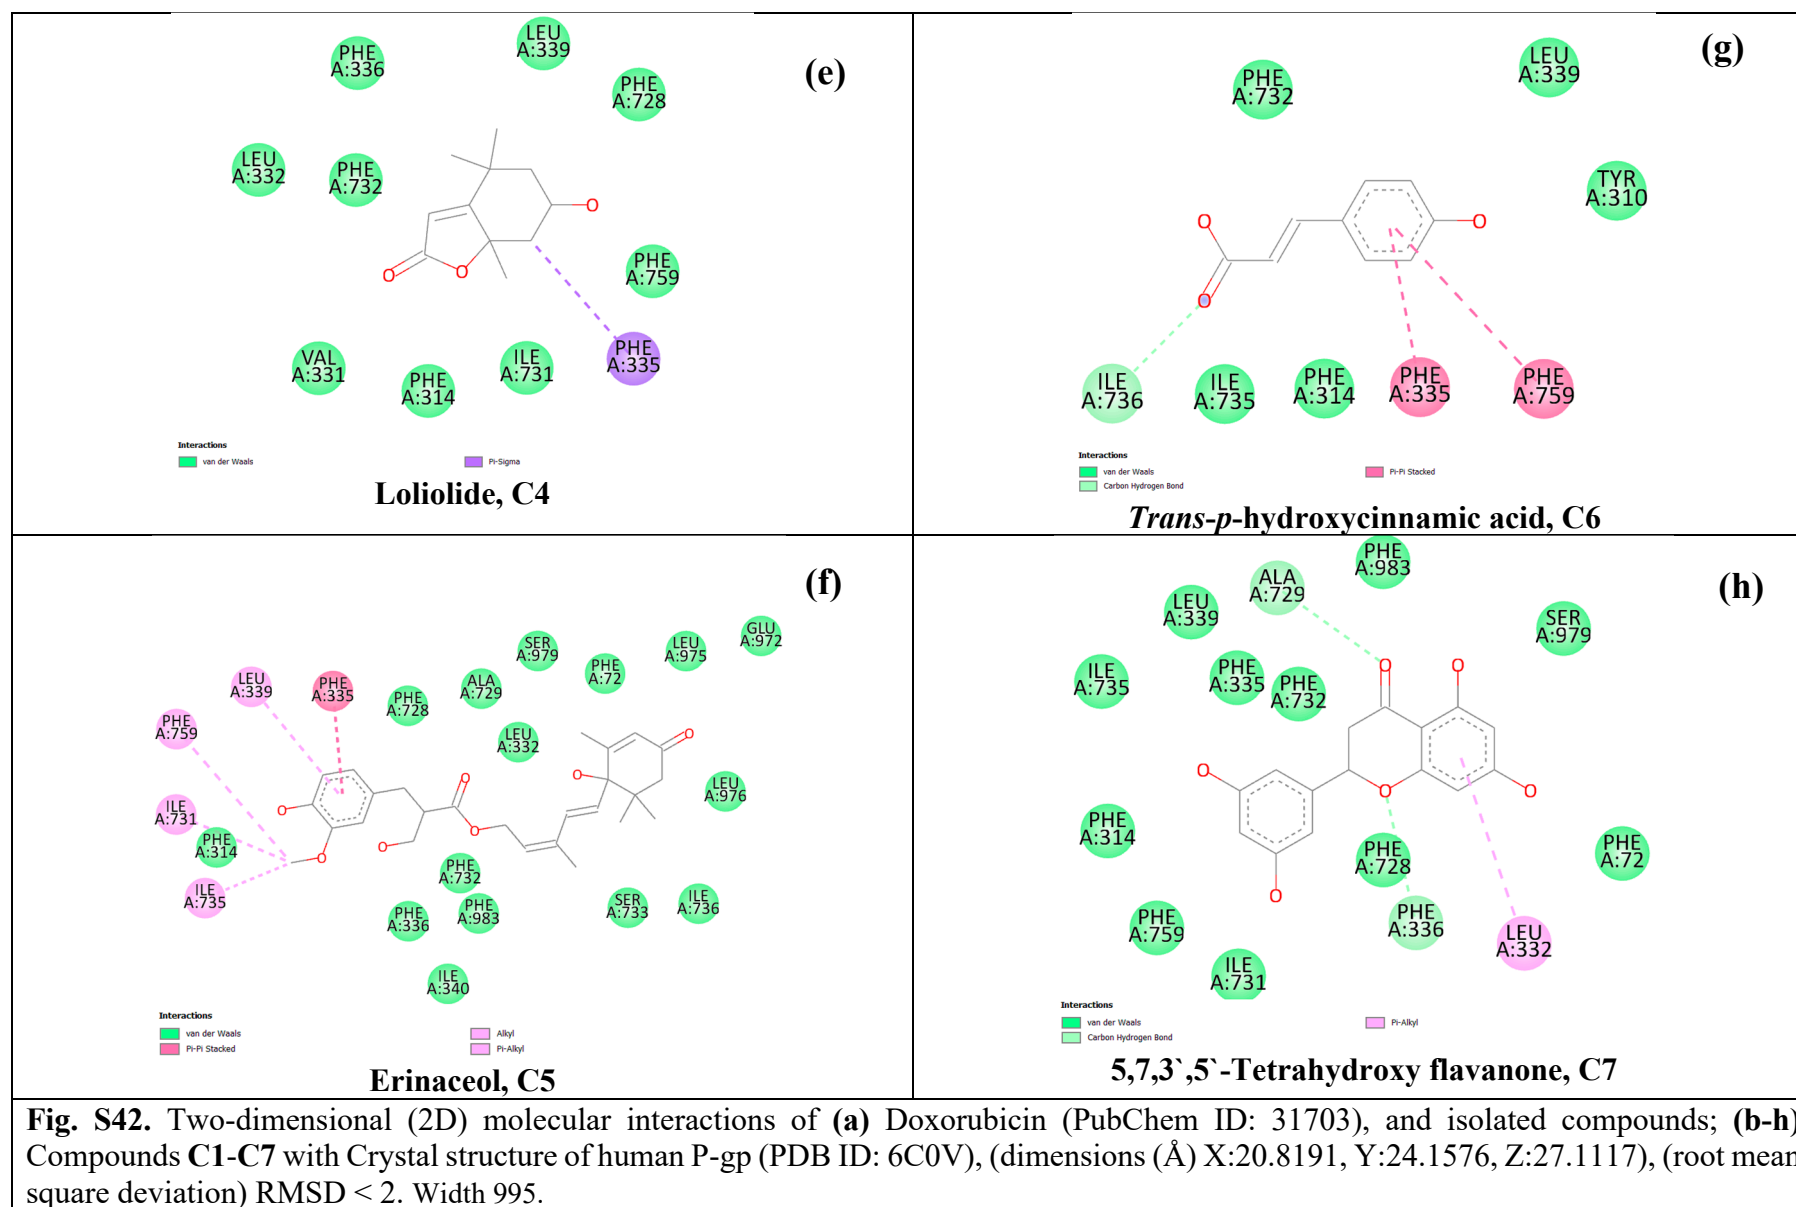

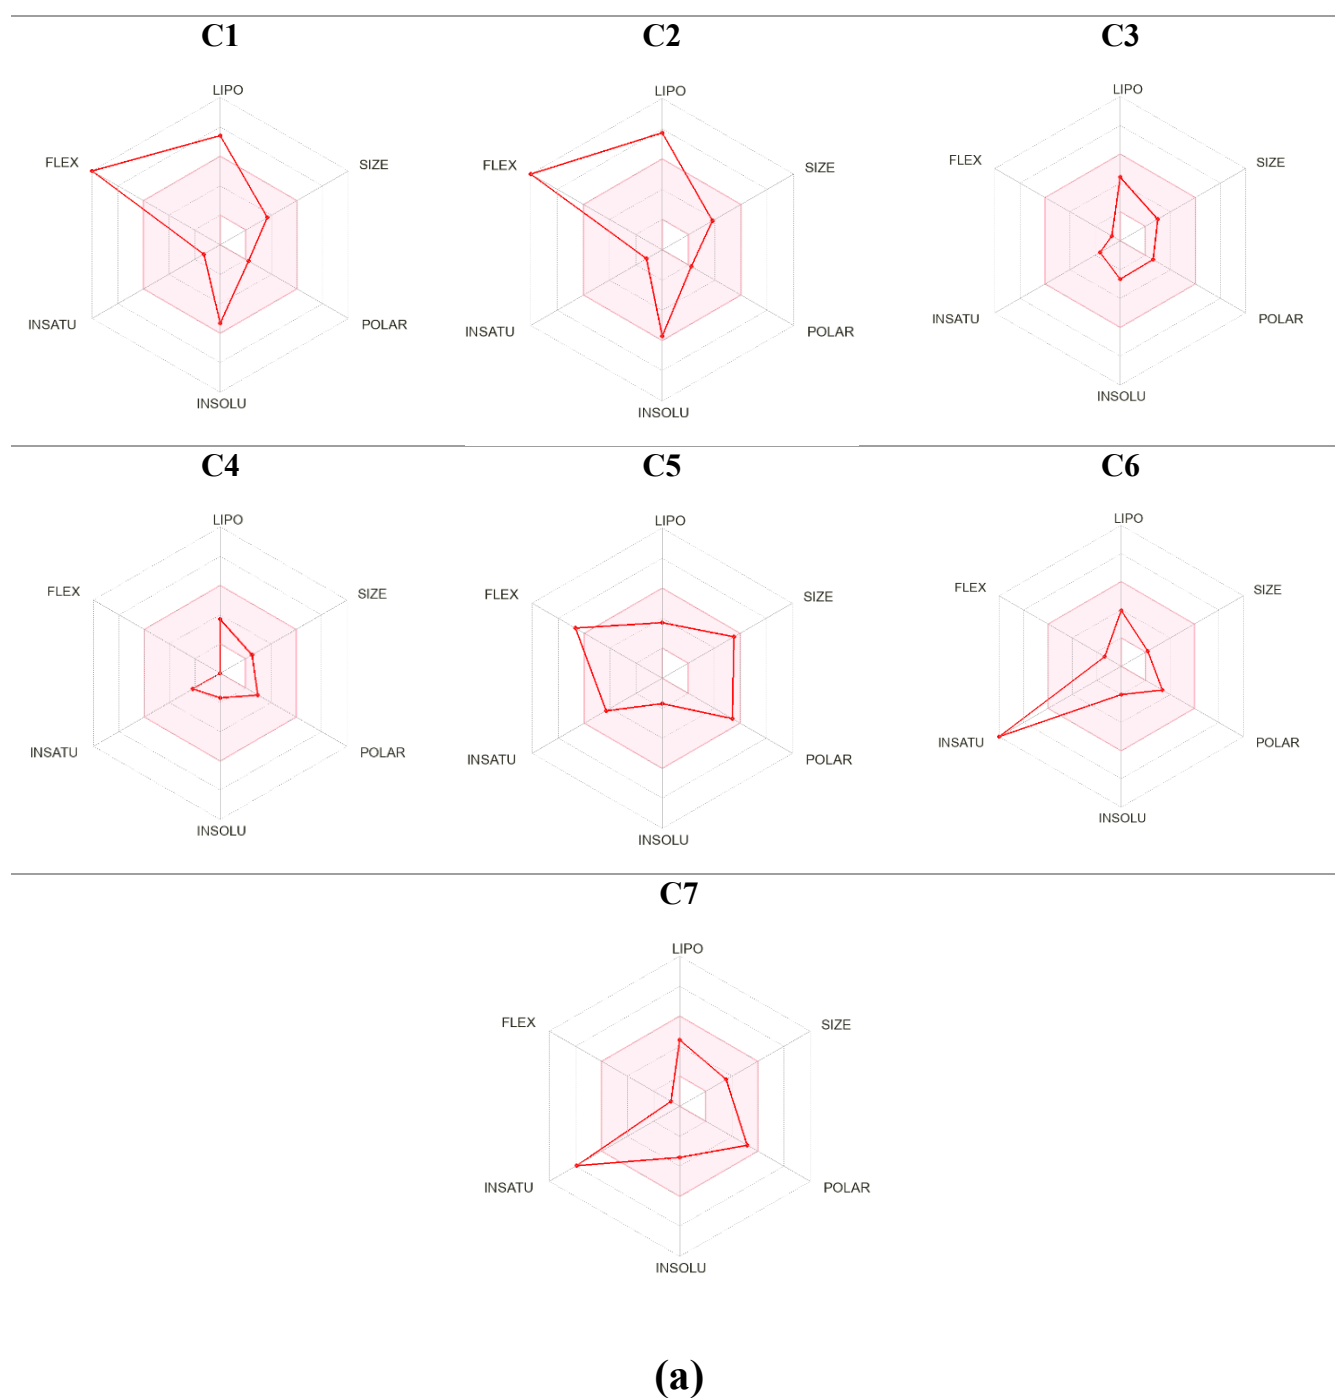

**Fig. S43. Bioavailability radar representation of compounds C1-C7 (molecules 1-7).**

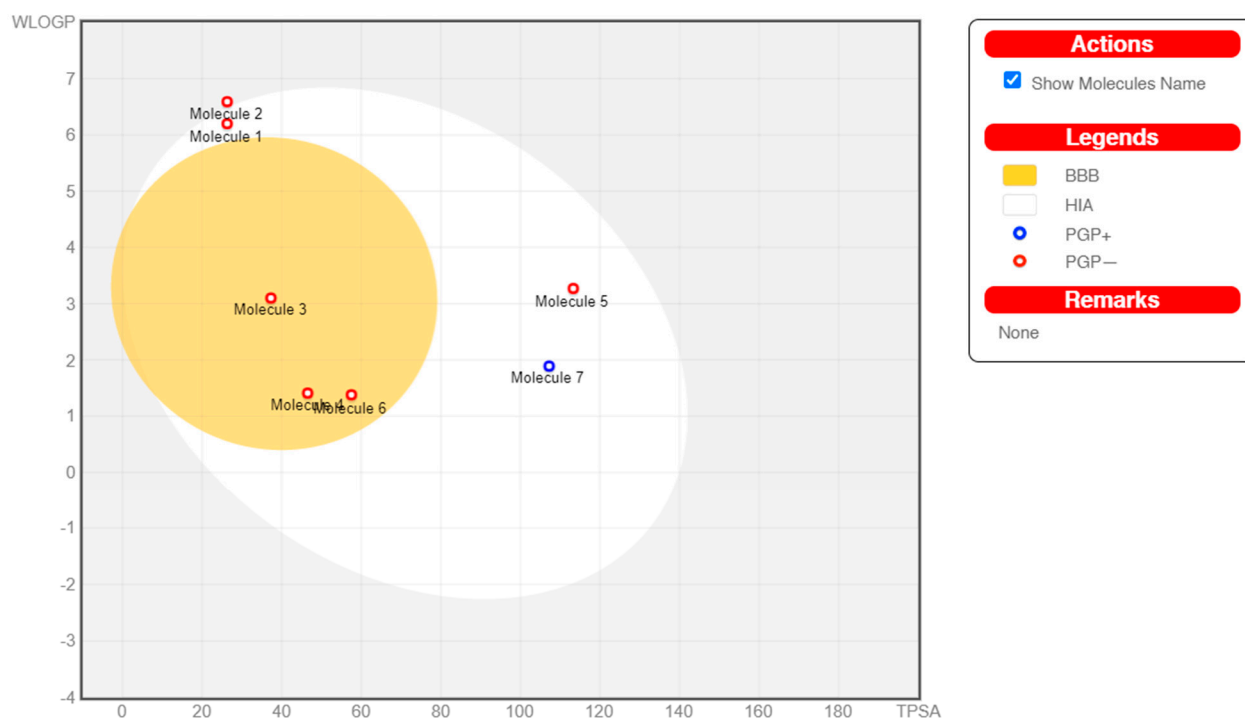

**Fig. S44.** Predicted BOILED-Egg diagram of compounds **C1-C7** (molecules 1-7, respectively).
